# Supplementary material for: The Cell Wall PAC (Proline-Rich, Arabinogalactan Proteins, Conserved Cysteines) Domain-Proteins Are Conserved in the Green Lineage
Source: MDPI journal article supplement (doi:10.3390/ijms21072488), 2020-04-03

GCPKSDCQAVLARWRPEEGCKPVVDAAPVFYPTEEEFKDTLKYIAKIRSAAEPFGICRVVP  
PPGWQPPCPLREDTAKLHVMKFPTRVQEIHKLQVRQPVKKC

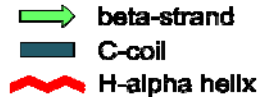

GGWLCDWCRLSKQWQPKKDFKGCKPHPVIVKPRSIALDFLVQVALSPTELGDLDVTENFNT  
LNMDCGSYTSSSVECDKLGPDAGSQDLGVGERERSSSFENKTVTSDEEGSLGSTRIVKDG  
MKKKPHLLRC

GVYTCPFCPNKKRESTGTSNSSIMHKAKVRISAVGCRLEDEMKSAAEVAAQRIVTLQQAVP  
KRLNPTHKIVYPVGVLCNLGRKGGDRTLETGCAELKEKFASFPRPKHVKTFGHWGSLGLAV  
FTFRRGMEGLDDC

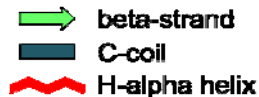

GSECCFQCALLYTTMYNERRIRVMTLSLPCTAILNSVFRSADLDSQFTYFLKQAAQQIPNTPL  
PQVKEQVVTSCVNILYAYRKYCAAASSSGQLILPETLKILPLYTLAFTKSMSLRPDVRIDDR

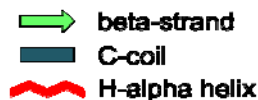

>ALVQ\_2020591\_Tmesipteris\_parva.nd

GLDYCFECVGNVDVMRAAFQSCHDGGWKTILVGIEASNKQLVFNPMQFFDGREIKGCTFG  
DFKGRTQIPNLVDTCLTKPDQLDLNAFVTHELPFSRINESFQMLKEGQSLRC

>ALVQ\_2017464\_Tmesipteris\_parva.nd

GCPSCSTCQKVLARWRPEAACLPVLDDAPVFFPLEEEFSDTMEYIASISAEVKQYGICRIVPP  
QSWRPPCPLKDFEKWTKLFPTRLQQIHKLQVREPQHKRYPQSKKRRTGRPAERGLSWQ  
RSLFSSEC

>JVSZ\_2131256\_Equisetum\_hymale.nd

GVDYCFECAGNSNLMYAAFESCHDGGWQAILVGVDDAAKKIIFGCMQFFDGREIKGCTFGG  
YKGKTQIPGLVQMYLNKELNVERFITHKLPFERIDEAVELLEKGKSLRC

>CAPN\_2040128\_Equisetum\_diffusum.nd

GVDYCFECAGNTNLMHAAFESCHDGGWQAIFVGLSDAAKKVDFSCIEFFDGREMKGCTFG  
GFKGKTQISGLVQRYLNKELNVDGFITHKLPFERINEAVELLEKGQSLRC

>2118953\_Equisetum\_hymale.nd

GCPKCSVCQKVNARWRPEAACRPSIEEAPVYFPLEEEFKDPLEYISSIRAEAEQYGICRIVPP  
QSWRPPCPLRHSEKWETLTFSTRVQQVHKLQVREVC

>ENQF\_2016454\_Lycopodium\_annotinum.nd

GADKCKLCKLTS DHVHAHRLVLSSQCEFFQALFRSGMRDSAEQAIRVHRRKNVLYLYCGE  
LLILSEVEGDCAWSHLGTQRQLTYLRQLVELAEAEWLLEDLQQQC

>ULKT\_2018407\_Lycopodiella\_apressa.nd

GIPLCCLGCLYDTNSEQKSLARRECIRLFGTLALLHGFLAPYLSKIISCIIRRLKDPDTIVRDACV  
DAVGAIALNVISPEDEDPSADYGNDGSFSPVFEVFFKPLVEALNEQNKHLQVGAAMC

>IZGN\_2001467\_Dacrydium\_balansae.nd

GTLKCQCVCQSVHPGDRPHICLELNHFLELMFPLEYAERKKSILVNKQTCKQSKEESTSCKKK  
AENTSAEVPANSSEQAIIHPGVGC

>Zosma236g00130.2

GVSECSDCGNDDSFKGIVAVVCKSEDKSTYDLVGVGESSKDGGKFSVQLPASLLKKDGTQL  
TRQCFACLHSSKNAPCIENHPDSLMLSLASTFKSEGEAALHVFATATGKLAFSRVC

>Zosma16g01740.2

GKAECPCDCGSHNLNGIRVRVMCRSRTSHRLYRSRVHGNRELDLNGKFTLQLPATLLNKDG  
TGLIRKCYAQLYSTSKKAQCPTEKNNREMFRLVLTSKFKSVHVFGIPTGKFNFSTRNVC

>Spipo1G0061700.2

GAGECSDCASKNIDSAVAFNGLNVAVYCMGGKGQFQIKGVGKLDKDGKFSVKLPSTVKE  
EGGLKEQCFAQLHGGSQNTPCPSAGGSFDAAKLVPEVVEGGEHTFVTAGTLSFSSETC

>Spipo6G0013300.2

GAGECSDCAIKNIDAAVAFNGLNVAVYCVAGKGQFHIRGVAKLDKNGQFSVRLPSDIVKENG  
GLKEQCFAQLHGGSKNTPCPSAGGSFDAAKLVAKSVEGATHTFVTAGKLRFSSETC

>Lus10026281.2

GFGECADCAKSQLHPSQIFSGLHVTIDCKPHSGEFKTIGSAKLDELGKFSVSLPNGVVAEDG  
QKLKQECYAQLHSAADGAAPCAAHGGLESTKVVFNSQKKTFFELSGGKIKFSPEVC

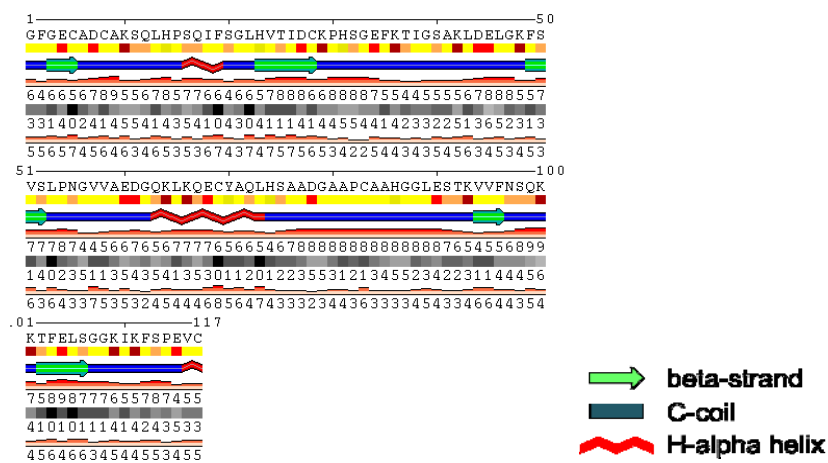

Supplement: s1 [file s1]
