# Supplementary material for: The Cell Wall PAC (Proline-Rich, Arabinogalactan Proteins, Conserved Cysteines) Domain-Proteins Are Conserved in the Green Lineage
Source: MDPI journal article supplement (doi:10.3390/ijms21072488), 2020-04-03
Supplement: s1 [file s1]

**Supplementary file 11.** *In silico* mutagenesis experiment to test the stability of the 3D-structure of a set of PAC domains mutagenized on one of the six conserved Cys residues.

The sequences of the PAC domains are given in Supplementary file 2.

*In silico* mutation experiment for possible five Cys-PAC domain variants. The six Cys residues have been replaced by Ser and the change in stability was determined by MAESTRO.

ddG ... change in unfolding free energy in kcal/mol, positive values indicate destabilization. Confidence ... values closer to 1 indicate better prediction confidence

| Xray/Model                    | Mutation to Ser at | ddG     | confidence |
|-------------------------------|--------------------|---------|------------|
| 4z8w (template)               | Cys 1              | 3.57549 | 0.77027    |
|                               | Cys 2              | 2.12721 | 0.86736    |
|                               | Cys 3              | 2.45255 | 0.8131     |
|                               | Cys 4              | 2.75184 | 0.82611    |
|                               | Cys 5              | 2.45704 | 0.82707    |
|                               | Cys 6              | 1.32267 | 0.83781    |
| AmTr_v1.0_061.7.1 (clade A)   | Cys 1              | 3.39842 | 0.78146    |
|                               | Cys 2              | 2.68815 | 0.83047    |
|                               | Cys 3              | 2.98417 | 0.79527    |
|                               | Cys 4              | 3.44757 | 0.78292    |
|                               | Cys 5              | 2.76256 | 0.79688    |
|                               | Cys 6              | 2.60587 | 0.81457    |
| AmTr_v1.0_066.9.4 (clade B)   | Cys 1              | 3.87618 | 0.76273    |
|                               | Cys 2              | 2.55631 | 0.8366     |
|                               | Cys 3              | 3.06021 | 0.80979    |
|                               | Cys 4              | 3.81503 | 0.79575    |
|                               | Cys 5              | 2.68014 | 0.82918    |
|                               | Cys 6              | 2.14382 | 0.85645    |
| AmTr_v1.0_062.88.1 (clade C)  | Cys 1              | 3.42963 | 0.8024     |
|                               | Cys 2              | 2.2582  | 0.88253    |
|                               | Cys 3              | 3.03229 | 0.79154    |
|                               | Cys 4              | 3.99712 | 0.76382    |
|                               | Cys 5              | 2.79181 | 0.82795    |
|                               | Cys 6              | 0.77256 | 0.91274    |
| AmTr_v1.0_041.161.2 (clade D) | Cys 1              | 2.56958 | 0.84224    |
|                               | Cys 2              | 1.6971  | 0.88547    |
|                               | Cys 3              | 3.90044 | 0.76834    |
|                               | Cys 4              | 3.90877 | 0.77109    |
|                               | Cys 5              | 1.2632  | 0.89708    |
|                               | Cys 6              | 2.3301  | 0.82932    |
| AmTr_v1.0_00047.2 (clade E)   | Cys 1              | 2.90614 | 0.80333    |
|                               | Cys 2              | 2.78046 | 0.80662    |
|                               | Cys 3              | 4.21589 | 0.73165    |
|                               | Cys 4              | 4.33569 | 0.71088    |
|                               | Cys 5              | 2.80004 | 0.80999    |
|                               | Cys 6              | 1.45091 | 0.90019    |
| AmTr_v1.0_068.122.1 (clade G) | Cys 1              | 3.65844 | 0.76977    |
|                               | Cys 2              | 2.69138 | 0.81918    |
|                               | Cys 3              | 2.82805 | 0.82595    |
|                               | Cys 4              | 3.36102 | 0.81705    |
|                               | Cys 5              | 2.72987 | 0.83278    |
|                               | Cys 6              | 1.35604 | 0.89068    |
| AmTr_v1.0_153.4.1 (clade H)   | Cys 1              | 3.44759 | 0.80186    |
|                               | Cys 2              | 1.70675 | 0.88404    |
|                               | Cys 3              | 3.41888 | 0.78206    |
|                               | Cys 4              | 3.40637 | 0.75515    |
|                               | Cys 5              | 2.37172 | 0.8465     |
|                               | Cys 6              | 1.24852 | 0.89123    |
| AmTr_v1.0_019.72.1 (clade I)  | Cys 1              | 3.30608 | 0.78534    |
|                               | Cys 2              | 1.52879 | 0.87337    |
|                               | Cys 3              | 3.37773 | 0.78849    |
|                               | Cys 4              | 3.4131  | 0.78992    |
|                               | Cys 5              | 2.40839 | 0.84372    |
|                               | Cys 6              | 0.88844 | 0.92186    |
