# Supplementary material for: The Cell Wall PAC (Proline-Rich, Arabinogalactan Proteins, Conserved Cysteines) Domain-Proteins Are Conserved in the Green Lineage
Source: MDPI journal article supplement (doi:10.3390/ijms21072488), 2020-04-03
Supplement: s1 [file s1]

## Supplementary file 2. Amino acid sequences of *bona fide* PAC domain proteins.

Originally, the accession numbers of the onekp database were of the following type: #onekp:WZYK\_scaffold\_2017325 Bazzania\_trilobata. They have been simplified for more convenience, as follows: >YFGP\_2017325\_Bazzania\_trilobata.

In the protein name, “.nd” means that the type of protein could not be determined because the amino acid sequence of the protein is not complete; “.1”, “.2”, “.3”, “.4” refers to the type of protein (see Figure 2).

Sequences in blue were not retained for the phylogenetic analysis because their percentage of identity with other PAC domain sequences of the same plant was higher than 85%.

Sequences in violet were not retained for phylogeny analysis because in some cases, only one/a few species were selected for a given plant family.

Sequences in brown were not retained because they were incomplete and it was not possible to predict either their sub-cellular localization or the presence of additional functional domains.

### Marchantiophyta

```
>Mapoly0014s0128.2
GNVFCDQCMKNTVFPFALPMLGAKVSVECKAADGSMMASAEATTDFFLGGFVASFKGMADLEGCKAY
MKSSPDSSCSIAGYEGGGELKLRSKFFFTSFYGVPEPMFFKPAAPKSFC
>WZYK_2017325_Bazzania_trilobata.2
GSVFCDECLKQEAFPGVPLKDATVKIQCYDGTGANVVASATATTDFFGGYGATFKGVSDLGDCQAF
LANSPDTSCLNLEGGGKTLDLKSKFLSDAFYIVDPLFYKPVQPKDFC
>WZYK_2010801_Bazzania_trilobata.1
GCVYCDNCAIGFETPVSTHIAGAEVKLECRDRHTEHVVEAFATTDKAGNYEIPVKEDQRTVCDTVL
VKSPMKGCSKADPGRDRSRVTLTSFNGMISSYRYANNMGFLRDEPLAVC
>RTMU_2181156_Calypogeia_fissa.2
GSVFCQCLTHEVFPFSYPLKDARVSVQCYDSSGVHVVASATATTDFFGGYIATFKGVSDLGCKAF
VSSPDSSCNLVDGGGKTLKSKFLWDAFYIVDPLFYKPAHPKDFC
>ILBQ_2004952_Conoccephalum_conicum_2
GNVFCDQCMKNEIFPFALPMHGAKVSVECMGADGRMAASAEATTDIFGGFWVSFKNAENMDGCRV
YMKSSPDSSCSMVGQDQSGRAVQLKTKLFFSSFYAVEPMFFKPPAPKSFC
>CHJJ_2136182_Lejeuneaceae_sp_2
GSVFCQCLKQAVFPFGLPLKGAKVTVQCYDASGKIVASGGATTDFFGGYAVTFKGASDLTGCKAFAT
SSPDSSCVLTSSGGQAVALKTKFIHNAFYVAEPLFFRPPQPKNFC
>TXVB_2074716_Lunularia_cruciata.2
GNVFCDQCMKNAVFPYARPMLGAKVSVQCYGADGSMLASADASTDFFLGGFLASFSGVSDLG
EGCKVFMKGSPDSSCNFADQSGQGVKLRTKFFSSFYGVPEPMFFKPPPTPMGFC
>TFDQ_2117810_Monoclea_gottschei.1
GKVYCDNCAAGFPTRISPIPGATVAVECKDNAGKRSFYNEEDRTDDKGLFSIAVKGEHEREACEAYTV
SSPTSCNIQSDSSRGPVYLTHNNGIESDERKTGPFASFSSQIHSAC
>TFDQ_2004419_Monoclea_gottschei.2
GKVFCDTCLHKLSEHGYVISGASIAVECDLNRKAMSVSVTGETDENGFEKVEIPSTILQLADHELKNC
RVISRNSPYDSCIPSTSAPSKLTLQSDSNGVLTYSARPFSYRHETVPPSC
>TFDQ_2013818_Monoclea_gottschei.2
GNVFCDTCFQQQFSEKSYFISGASVAVQCRINKQQKPYFHIEAKTNEYGEFKVELPPSIFYSHEQVKR
CSAKLLKNPQGSCKVASKSSSFLSKQGGIYTYSAGPFTYRPPSLPPSC
>YFGP_2104693_Pallavicinia_lyellii.2
GSVFCQCLKHEVFPFGLPLNGAKVSIQCYGASGANVMSSEATTDFFLGGYVATIKGVSDLGCKAV
VTASPESSCNLVDGGAQALVLTKFFFNAFYVVDPLFYMPAKPKDFC
>UUHD_2145467_Porella_pinnata.2
GSVFCQCLKQEVFPFGLPLRGAKVSVQCYDGTGVNVVASAEATTDFFGGYAATFKGASDLGGCKA
FVTSSPDSSCSLIEGGGLTPVVKTKFFFNAFYIVDPLFFKPPQPRDFC
```

>HPXA\_2020358\_Ptilidium\_pulcherrimum.2  
GGVYCDQCLKQEIFFPGLPMNDAKITVECYDGTGVNVVASATATTNFLGIYETSFKGVSDLSGCKAFV  
TSSSQSSCSLAEGNGQTLDLKTKFFNNAFYSDALFYKPAQPKGFC  
>WJLO\_2035800\_Riccia\_berychiana.2  
GNVFCDQCMKNTVFPFALPLHGAKVSVQCAGADGKMMMAAADANTDIFGGFLVTFKGVEDMGGCRV  
YMKSSPDSSCNIVGNQGGGLAVQLKTKLFFTSFYGVPEPMFFKPPAPKSFC  
>IRBN\_2161692\_Scapania\_nemerosa.2  
GSVFCDQCLKQEVFPFGRPLKGATVSVQCYDGAGVNVVASATATTDFFGGFIATFKGVSDLGCKAV  
VSSSPDSSCSVSDGGGQTLALKSKFLNHAFYFVDPLFYAPAKPDDFC  
>HERT-2003915-Sphaerocarpos\_texanus.2  
GNVFCDQCMKNAVFPYALPMLGAKVSVQCYGAGGSMVASADASTDFFGGFVATFKGVSALDGCKV  
VMKGSPDSSCSINADSGGKALELKTFFFSSFYGVKGPMFYKPSAPKTFC

### Bryophyta

>Pp3c1\_27500V3.2  
GKVFCDCRQCNKVFPPFAHPMSKAKVSVQCKDWSGRVVGARTSTNFLGDFIVQFKGKKDLSGCSVYL  
DGSSDRSCNIIGGGRRRAISLKSFLFQAFYVADPLFYKPARPMGFC  
>Pp3c14\_8250V3.2  
GKVFCDCRQCNKVFPPFAHPMSKAKVSVQCKDASGNVVDYADASTNFLGDFIVSFKGKEDLTGCSVSL  
AGSPDSKCSIVGGGGKTVTLKSKFLFKALYVVDPLFYKPALPMEFC  
>Sphfalx0052s0052.2  
GSVFCDQCLQDRVFPFSEPMDGAKVTVACKDNNGNVVDSVQGSTDFLGNFLVTFKGKQDLGCTVS  
LAGSSRSDCNIAAGGGGKTLTLKSRLLEALYVVDPLFYQPAKPLDFC  
>WNGH\_2084316\_Aulacomnium\_heterostichum.1  
GRVYCDTCRAQFVTKLSEYMEGAKVRLECRNREGGDLTYSVEGETDTTGTYQLGVDGEHENEVCEI  
VLVKSSKPDCEISTDSYTRKASRISLTNNNGIVSGKRLANALGFMKKEALPEC  
>BGXB\_2078424\_Plagiomnium\_insigne.2  
GKVFCDCRQCNKVFPPFAHPMNKAKVSVQCKDQSGKVVDQAQASTNFLGDFMVSFKGKEDLAGCYVY  
LSGSADSKCNIVGGGGKTLKSKLFFKAMYVVDPLFYKPAKPMGFC  
>SKQD\_2012127\_Takakia\_lepidozioides.2  
GSVFCDQCIQGRVFPFSYPLDGAKVTVQCKDAYGRVVDQAQGSTNFLGDFLITFKGKEDLSGCQAILS  
GSPEAKCNIVGGGGRTMTLKSFLFFQALYVVDPLFYKPAQAPAGIC  
>YWNF\_2047246\_Hedwigia\_ciliata.2  
GKVFCDCRQCNKVFPPFAHPMHDAAKVSCKDKYGVMDYAQASTNFLGDFIVSFKGKEDLSGCYVYL  
SGSSDRKCNIVGGGGKTLNLKSKFLFKSVYVVDPLFYKPKPMGFC  
>TMAJ\_2023569\_Neckera\_douglasii.2  
GKVFCDCRQCNKVFPPFAHPMNKAKVSVQCKDKSGKVVDYAQASTNFLGDFMVSFKGKEDLSGCYVY  
LSGSADSKCNIVGGGGKTLKSKLFFKAMYVVDPLFYKPAKPMGFC  
>WNGH\_2083088\_Aulacomnium\_heterostichum.nd  
GKVYCDTCRQFVTKVSWFMKGATVKIECRDREGGSVTYSSQAETNEKGAYTISVDGEHEEEICEVV  
LVKSSDPECSEVSKDPFLKKSARVSLTMNNGIVSPVRLANPLGFMKKKPIPEC

### Anthocerotophyta

>RXRQ\_2140319\_Phaeoceros\_carolinianus.4\*  
GHVFCDQCRQGLSSQLTVPLQDAEVGVTCDVYGFVITYNAVAYTSPDGSFKIPLDDLPLYGVKGCK  
AHLVASGDFNCNLASSVGGGAAGAKLVLSRSLEEVIFTSGPFAYHPSRPLRLC  
>RXRQ\_2139239\_Phaeoceros\_carolinianus.4\*  
GHVFCDQCKMGLNSLFTVPLQDAEVGVTCDVYGFVITYNAVGYTSNDGAFQIPLDDLPLYGVKGCK  
AHLVSSSDFQCNMASSVGGGNSGAKLVLSRSLEEVIFTSGPFAYRPSKPLLC  
>IQJU\_2004004\_Anthoceros\_formosae.nd  
GTSECLDCAEKNLKAEDAYQGLQVAICKTSDNEDYIISSDKLDKNGNYKVQLPTELIGDDGEPKQECF  
AQLHAVTNAPCPVKNGLSPTKLVLKSKKDGVAHFAAATKLQFSSTTC  
>IQJU\_2076581\_Anthoceros\_formosae.nd  
GRVYCDTCRAGFETTKTAHIAGARVKVECRDRKTMDLVYSKEGTTDSKGSYSIFVDEDEDQLCDAV  
LVSSPQKDCSTPSAGREHARVVLTRSNNGIVSGDRYANAMGFMKDEAEPGC

### Psilotales

>ALVQ\_2002139\_Tmesipteris\_parva.2  
 GRVYCDVCAAGYFTKSSSYIQGAQVAVECTSKDGTPTLSVQGKTDSGDFEIALHGDHQTELCAARL  
 VHSPSESCNALTDRASPVLTRHAGLAVNVIATGPFSSFKPQQPLSA

>ALVQ\_2024672\_Tmesipteris\_parva.2  
 GSVYCDQCLDGRRSVWSLPLDGAKVTVECNNSKGQEILSREGDTGLFGDYVIRFDGSPNLGGCAVR  
 VLSSPKRTCNIIVAIGSKSISLSWKLFGLSSYSADALSFRPSKAMSFC

>ALVQ\_2015603\_Tmesipteris\_parva.2  
 GTVFCDQCIQQRFTKHSAILHGASIVIECKPVKSTGGTVRAEILTDEHGMFKAVIALSPRRVRQCIVRLV  
 SSPIKSCSAQPSNPSTFTSASLKSQGRRYFYNAGFLSYRPDSPPPSFC

>ALVQ\_2015640\_Tmesipteris\_parva.2  
 GVVYCDRCLEHTYTKNGVLLKGASVAIDCKDKDHDAPYRVVALTDESGSFKVRLSPSLHHSEAQLDC  
 TAHLSSSSSQCKVLGISTKKSSDFLHHSRDADHVIYTAGDFTFLPQAVPSFC

>ALVQ\_2102199\_Tmesipteris\_parva.2  
 GSVYCDQCVEGHRISWGLPLDGAKVAVECKNSNGQISLSKQGTNNILGLYSVEFDGSPGMEGCGVR  
 ALSSPSGSCNISAVASQPVSLSWKMFSLAFYSGNALSYKPSKPMASFC

>ALVQ\_2000815\_Tmesipteris\_parva.4  
 GQVYCDICRTGKFKKPLMGVKIGVLCWSGKEQLSFNGSTSITGRFRIELQGYDYAKWGGEHCKSKLM  
 EAQPGTSCPTIPLNDGEAGAKLHISKSEAETVLETGPFAYVSHKKHKQC

>ALVQ\_2022237\_Tmesipteris\_parva.nd  
 GHVYCDQCGEGLWGRMTVPLEEVEVSVKCKDLYGFVTFSAIGYTNDHGVYKIPMDEIPSIFGVEGCK  
 ARIMRSTNPFCEVPTSLSHGDSGARLELKSKEVVFISGPFAYKPFERPSKC

>QVMR\_2006336\_Pilotum\_nudum.2  
 GSVYCDQCLDGHRSVWSIPLDGAKVAVECNDSSGQKVLSTREGETGLFGDYAIRFDGSPHLGGCVVR  
 VLSSPKRTCNIATGSKSISLSWKLFGLSFYSVDALSFRPSKAMSFC

>QVMR\_2012184\_Pilotum\_nudum.2  
 GSVYCDRCIEGHRSVWGLPLDGAKVAVECKDSSGQMSLTKEGTTNMLGLYSVEFDGSPMEGCGV  
 RALSSPSESCNVAGVTSQPVSLSWKLFMAFYTGNALSYKPSKPMASFC

>QVMR\_2014545\_Pilotum\_nudum.2  
 GSVFCDQCAQQRFTKNSSILHGAIIAAECKAKRSTVTRTVRTATTDQNGMFKLEIPTTIARSPRRLRRC  
 VVLLVSSPIESCASQPSIPMPFSSMSLKSGLNHYFYSAGFLTYTPDSPASFC

>QVMR\_2053533\_Pilotum\_nudum.nd  
 GRVYCDTCAAGHFTKSSTYLPGAHVAVQCTSAEGRQTVHAEGKTDANGVFAIEVAGDHQNELCVAA  
 LLRSNSASCSALSRAIRVYLSRYNGLSTNVINTGPFSSFKPEQVSAAC

>QVMR\_2000503\_Pilotum\_nudum.nd  
 GLVYCDACKDGKYYKPLTGIVVASCLDGSNQTSFDGITDSTGRFRIELDGYDYQKWGGKNCNVKLA  
 EAPPSCNIGTGLPSGETSAQLHIKSTSKDEVVLESTPFAYVSENKFDEC

>QVMR\_2054588\_Pilotum\_nudum.nd  
 GRVYCDVCASGYFTKSSSYIQGAQVAVECTSKDGTPTLSTQGKTDSGDFEITLHGDHENELCAARL  
 VHSPSESCNVLTDRAPVHLIRNAGPAANVITGPFSSYKQEPVSAC

>ALVQ\_2022237\_Tmesipteris\_parva.nd  
 GHVYCDQCGEGLWGRMTVPLEEVEVSVKCKDLYGFVTFSAIGYTNDHGVYKIPMDEIPSIFGVEGCK  
 ARIMRSTNPFCEVPTSLSHGDSGARLELKSKEVVFISGPFAYKPFERPSKC

## Equisetales

>JVSZ\_2007333\_Equisetum\_hyemale.1  
 GRVYCDACGAGFFSKSSRYMAGAHVVVECTSKGGEKTLKAEGVTNAEGVFQIEVAGGHEEDSCTTG  
 VVRSESNACSSFSAKTFTSVYLTRNNGIANNIVNTGPFSSFRPDQVASSC

>JVSZ\_2123642\_Equisetum\_hyemale.2  
 GTVFCDQCHAQRLTLDSIFLPGTTISIQCVARRTNAQRFSYIHLKTRTNKFGQFKLKFPDFSGEQIQG  
 CTLELVRTPFKECNIGLGYSTKNSLKFLVKKNGAYFYTFGAIGVKPKVAPSAC

>E.giganteum\_11472\_Transcript\_23135.2  
 GYVYCDQCLNLKLTDNAIFLQGASVFIKCQDPQGYNWNTIATTNEKGYFQAKLHADFNPTCYAYIESS  
 PNAECNSMGLNMKNSLDFELTNSIGNNVITYSIGEFTFIPSIIPSLC

>E.giganteum\_7703\_Transcript\_16468.2  
 GHVYCDQCLDHNRTNNAIFLKGALIFIKCKDPERYHWKTIMATTNEKGYFQAKLHGDFNPTCYAHIKS  
 SPSTLCNVKGLNMKKSSNFEFSYSIDNNVITYSLGEFTFTPSILPSLC

>E.giganteum\_18690\_Transcript\_33322.2  
 GNVYCDQCLDHNLTNNAFFLQGASIFIKCKDTEGYNWKIIIATTNEKGYFQAKLHGDFNPTCYAHIKSS  
 PYSLCNEKGLNLKKPSDFKLVLVDNNTATYSVGEFTFTPSILPSLC

>E.giganteum\_9519\_Transcript\_19781.2  
GYVYCDQCLNHNLTNNAFFLQGASIFIKCKDSEGYNWKTIIATTNEKGHFQAKLHGDLPICYARIKSS  
PDSFCNVKGLNMKKPSDFKLSHVVDNNATYSIGEIFTPSILPSLC

>E.giganteum\_2589\_Transcript\_5803.2  
GNVFCDQCIQHKLTKNAIFLQGVSSISICKDHEGYNFKTIIATTNEKGYFQANLQGDHAISTCYASTQSN  
PNVDCNLMGLNMKKPLDFELAHNSGNNLTYSLG YFTFLPLNVPSFC

>E.giganteum\_7962\_Transcript\_16915.1  
GTVFCDKCHENRVTHNSIFLPGATISMQCIAKRMHKKHHSSHIHLKAKTDKFGFRFKADLPPHFKAKRMQ  
GCTLQLVRSPFESCNI FSKHLTSPSLLYISKHKGTSFFTLGAIDVQPKVRPIAC

>CAPN\_2037336\_Equisetum\_diffusum.1  
GVVFCDQCHQQRLTNSIFLPGSSVSINCIASRMNTNHSSHINLAKTDTYGGFMMKLPPSFSTNNVQ  
GCKLELVKSPFKECNIFSQLSTTNSFTWAAKHEDADFYTFGAISITPKVVPNAC

>CAPN\_2004677\_Equisetum\_diffusum.2  
GHVYCDQCLNHNLTNNAFFLEGASIFIQCKDTKGFNWKTIIATTNEKGYFQAKLHGDFNPTCYAHVKS  
SPNTLCNVNGLDTKKSSDFKLAYSVDNNVTYSVG EFTFTPSSVPSLC

>CAPN\_2038971\_Equisetum\_diffusum.1  
GTVFCDKCHENRVTHNSIFLPGATISMQCIAKRMHKKHHSSHIHLKTKTDKFGFRFKADLPPHFKAKRMQ  
GCKLQLVRSPFESCNI FSKHLTSPSLMYISKHKGTSFFTLGAIDVKPKIRPNAC

### Marattiales

>NHCM\_2008486\_Angiopteris\_evecta.1  
GKVYCDACAAGHFTKSSTYLPGAHVGVRCASPQGVETAYVEGATDKNGLFQIQVTGDHERDLCVAA  
LLRSPSATCNVLTQKTLDHVQLTRNNGLATNVVNTGPF SFKPAQVSAAC

>NHCM\_2064417\_Angiopteris\_evecta.2  
GSVYCDQCLNGHRTMWSSPLNGAKVMVECKNSNGQVTLSKQGETDLLGMYSIKFDGSPDMQGCTA  
KVVSSPKGPCNLAGTASNSVTLSWKLFG LAVYAAEALSYPKPAKPSSIC

>NHCM\_2003839\_Angiopteris\_evecta.2  
GRVYCDACDAGRFTKSSSYLRDAKVAVQCTSREGAETVYVEGRTNRDGVFKIKVAGEHEHDL CVAA  
VLQSSSQACNLLTDKSMATLLT SKKLANAVVQTGLLSFKPLQLSSAC

>NHCM\_2007797\_Angiopteris\_evecta.nd  
GGVFCDQCSERRFTRNSAILSGATIALECKSRKIHRTAFRVETSTDQRGIFKVNLPSSALRSLR SCTLQ  
LLSSTVESCSAHVSMAPVSTSPLIAPKSKHGGRYIYNAGWLTFHPSSLPSFC

>UXCS\_2010798\_Marattia\_sp.nd  
GKVYCDACAAGHFTKSSTYLPGAHVGVRCASPQGVETAYVVGATDKNGLFQIQVTGDHERDLCVAA  
LLRSPSATCNVLTQKTLDHVQLTRNNGLATNVVNTGPF SFKPAQVSAAC

### Polypodiales

>VITX\_2095101\_Blechnum\_spicant.1  
GRVFCDACGAGHFSKSSFYLAGAKVGVQCGSGQVRGHVTAYAEVKTPDGEFSIPVAGEHENEF CV  
ALVLHSAHPTCNLLSQRGAFATVLLTRNAGLADNVINTGPF SFPNRLATSC

>VITX\_2014902\_Blechnum\_spicant.2  
GKVFCDSCHVGRLTESSSVIEGADVALRCTSPTGEETAYVEGKTDKAGLFSIHVAGHGTSDACVA AVL  
RSSTSACNVLTQLQSEAAVNFGVAEGEILAGPFSFKPSKMSAAC

>AFPO\_2010170\_Blechnum\_spicant.2  
GKVFCDSCHVGRLTESSSVIEGADVALRCTSQGGVETAYVEGKTDKEGDFS IQVAGHDTSDACVAAL  
LRSTSACNVLTQTA AAVFFNEEADGEILTGPFSFKPSKMSAAC

>VITX\_2011943\_Blechnum\_spicant.2  
GSVYCDQCLNGHRTIWGLPLNDAKVLVECKDSNGKVTLSKEGSTNMIGAYAISISGSPKMDGCSTQL  
VGSSPRSSCAVAGVSTRPVELSWKLFGMAMYTAEGLFYKPSKPM SFC

>AFPO\_2008830\_Blechnum\_spicant.2  
GVVSCQDCKYVGTKSLTDAKPLAGAKVKLVQAGPRYKTFYTTATTDENGFFFLRVPHFD FHKFTPL  
DDCAILLSSPLRECSNPTNINYGKTGAPLRPIPTFAPSSEAFFSVGPLAFAPQPC

>AFPO\_2068240\_Blechnum\_spicant.2  
GVVLCQSCKFVGSGSVAHATPLPGAKVKLACQTGFRYNTFFSATARTDYNGFFIVRVPSFDFKTF SPL  
KDCVVS LVSPYAQCSTPTDINYGISGAPLC

>VITX\_2005384\_Blechnum\_spicant.4  
GNVICELCHKKEALEGAKVGVICQNGESEL SFYDTTNGKGGFRIELVGFEYRKYGGNACKAKLMAAS  
SENPCNTPTTSSMRHLHIKSKSDTEVVLFAGPFSFTSHSIK

>VITX\_2093320\_Blechnum\_spicant.4

GNVYCDICKNGNIKKPLQGVKGVFCWSGKSKKTFYGITNERGAFKILLTGFDYEKWGGASCQAKLIS  
 PSYATSCTLPTNLHGGKQHAHLHIKSKSPNEVVLLAGPFSYTSPLTHLKC  
 >VITX\_2098387\_Blechnum\_spicant.4  
 GHVDCHLCHKKHLAKVGVSCWNGDSEVLFGVTNDKGNFRIELDGFEYRKYGGKACEAKLIAAP  
 YDSPCSTPTSSTAHLHIKSKSDIEVLF SRPFSFTSTLKC  
 >AFPO\_2066516\_Blechnum\_spicant.nd  
 GLVLCQNCNYVGTSYYSYGKPLQGATVKITCESGDKSSFEAKAETDDHGYFLIEVPYDFEKEYVVD  
 CKMYLVSSSTSTCNTPTDINSGISGPIRLQNTSTDKSLYSAGPLVFAPKYC  
 >AFPO\_2069671\_Blechnum\_spicant.nd  
 GVVFCQNC SYVGISLTDAQALTGAKVQLACRDWRYKTYLYDTATTDENGYFFLKVPNFNFKHDPI  
 KTCRVFLVSSPPTCNVRTNINSGKFGSFLHKE NEFPDQILYSVGPFAPFAPPSPC  
 >VITX\_2016183\_Blechnum\_spicant.4  
 GFVVCDSCRENRLSNFSLPIPGATITLTCKITSKHHSTSTPFTTKASSDKYGAFSFDLPFSKPRLLRRCK  
 VELTSSPFEACIKKTPYSWEVLSPILSKSKEKGHLAYFSGWLSYQPNILPSFC  
 >VITX\_2095258\_Blechnum\_spicant.2  
 GVVSCQDCKYVGSKSLTNAKPLAGAKVKLVQAGPRYKTTFYTTATTDKNGFFFLRVPHFDFSKFTPL  
 DDCAIFLISSPIKTC SNPTNINYGKTGAPLRPIPTFAPSSEAFFSVGPLAFAPQPC  
 >AFPO\_2068324\_blechnum\_spicant\_1.  
 GRVFCDACGAGHFSKSSFYLTGAKVGVQCGSGQVQGHVTAYAEGKTGPDGEFSIPVAGEHEKD FCV  
 ALVLHSAHPTCNILSHRGAFATVLLTRNAGLADNVINTGPFSFAPNRLATSC

### Lycopodiales

>ZZEI\_2006869\_Phyloglossum\_drummondii.1  
 GRVVCDCVCGDSSIGPEDHVLEGAEVAVLCLTKSGEVLNYQAFTNSKGIYSVAETMPESDRWASCLAR  
 PISSFHEHCTKRGDAHKGVKFTYNMPSGYSHTVKPFYKPPASVPVYC  
 >ZZEI\_2006244\_Phyloglossum\_drummondii.2  
 GTVFCDQCLIGEPSIWGPPMHDA SVTLDCQNSGNSDQAKTSFIGTFVFKVGGDADLSSCTARLTGSS  
 SASCSLLGNAEKPLKLDWKIFGESFYSVAHVLLPHSGPTPPLVLPKPPPLSLPPSPFQDPSSC  
 >ZZEI\_2019056\_Phyloglossum\_drummondii.2  
 GTSECLDCAEKNVKT ELAFKGLHVAVKCKTANGMYETKAIGELDENG SFKVQLPHELLREDGELMKE  
 ECFAQLHGVSDAPCPGKDGLLDPSKIVLSTSKADEKQAFVAEVGKLSFSSSTC  
 >PQTO\_2078178\_Lycopodium\_deuterodensum.2  
 GSVFCDQCLMGKPSIWGSPMH DANVTVDCKNSNNAIQSLHHASTSVLGTFTVFTVSGDADLSSCSARL  
 TGSSSSSSCSLFGNAEQSLKLEWKMFGEAFYSVEPMFFKPEKSMPFC  
 >PQTO\_2013256\_Lycopodium\_deuterodensum.2  
 GSVFCKQCQVSSLAIDHFNTPLAGAQVSLRCNDGNSNLVGLSSLESTAVTNKKGKFKISLNADYYQKHGAGRCWVEL  
 LRSPDEQCNIPTG SEREVNSASVSTQLSDSFSNKLIIYVGPFTYK PASC  
 >GTUO\_2011273\_Huperzia\_selago.2  
 GMVFCDCCLEGSYTQNA AFLPDVTVAVECKNSSGSEIFAWKAASNRKGSFVLLIPPQETIQKCWIQLNNPHGVCN  
 SISKVKEASQFITTSLKSSIGFTVGEFSYQPKSPFSFC  
 >PQTO\_2082336\_Lycopodium\_deuterodensum.3  
 GTVYCDTCWDGNFQTETHFLPGVT LIMQC DTIIEGQFFGDTDAEGHFSITVTSSDYEKWNLDECKVKLLKSSHGLC  
 NVATDFNNGQSGAETRLESISSTAILKSGPFSFKPDQPYPEC  
 >ZZEI\_2124425\_Phyloglossum\_drummondii.4\*  
 GFVLCKDCGPLTTFPLRGATVDVICSDANGTFFSNTATTD AVGHFEDNIPGIAGNIGLIQDCLVTLGSSSVAQC NVKT  
 NVNGGISGVHLGTGGTKDLYIVGPFAFTTQKC  
 >GTUO\_2005379\_Huperzia\_selago.4  
 GKVYCSKCVIKAPRAHHHHEGLKGAKVEISCGDIIAYGYTNKYGHFKIKLYDYDEKRG IKQCQAKIVN  
 SANLNKSCNVLATHHKYKSGYPLKLKYAHENKVLLVARSFVYTSNEPDVEC  
 >PQTO\_2010640\_Lycopodium\_deuterodensum.nd  
 GTVLCDCCLEGRYTQNTAFLSDVSVAVECKNGSGGENFIWQGVSDRKGNFAIDIPSLGTNQKCWVYVLLNNPHGSC  
 NSKQASAPKGTISSHPLTLQSLHKSSIVYTVGKFSYQPKAPFWFC  
 >UPMJ\_2079990\_Pseudolycopodiella\_caroliniana.nd  
 GSVFCDQCLMGKPSIWALPVHDATVTLDCKNGVKENDASTSMIGTFSFKVSGDNDLSSCSARLTGGA  
 ASSCSEMGS AEQSLKLDWKIFGEAFYSVEPMFFKPKDKPMSIC

### Isoetales



>PKOX\_2004461\_Isoetes\_tegetiformans.1  
 GRVFCDCRCLEGRYTKAGVFMQGAKEVLECRSLDGSSETFEGVTDHSGSFRIVLEGLDGLCSLKLTH  
 SPFSVCHIPSNDDAEFQILPKHLRPPSMMLYAGRFSFRPSLPLPIC

>PKOX\_2094197\_Isoetes\_tegetiformans.2  
 GSVFCDTCLDNRYTNNIIFHDANAVLECKNKDGFQAHAAANTNRRGEFVMELMSQVSIRYCSVKIV  
 VDDAINECEISSSSHALSLQATRGSTTYEVPFFIYKPKEPLSFC

>PKOX\_2095629\_Isoetes\_tegetiformans.2  
 GYAACDRCLDGGFTNNISPLSGVKVQIQCKNNAGRITYSTTQVTDKQGSFSVDLPTSIAQAQAIKNCA  
 SKVVEALPHPCNNVGNLQSTPVPLYIKESMKTSHQIYAAGLFMYKPDKAMSGC

>PKOX\_2095893\_Isoetes\_tegetiformans.2  
 GSVFCDSCLENRFTKNSILLKDAKAVLECRNKDGRLEQHGVAATNDKGEFEMELRQNSSKISIQDCST  
 RIILGHKTKQCEIASTSQUALSLQAIRGGIVTYNVDPFIC

>PKOX\_2099470\_Isoetes\_tegetiformans.2  
 GRVYCDRCVEGRFSKFSSFLEGAKVAVQCQTAEGKIKSFEGSTNEAGRFSIAVDAHEKDACAVALLS  
 SPSSECAIPFTNAASQIELSKTIAAATGLKYGGALSFRPEKAEPAC

>PKOX\_2007667\_Isoetes\_tegetiformans.2  
 GAIFCDRCFDEALVQHKTFLPSGAQVILVCKDESGKVVSTHGYSNKNGVFELKTVQNHASECKLQL  
 GESTDAECKTATNINKGIAGVDVSEGLSSSKHELEYTVGPFAFRPSNPSPSC

>PKOX\_2008463\_Isoetes\_tegetiformans.4  
 GKVYCDKCYGTDNVHHVTHHHKGLKGGKVKISCGKDVYGYANKHGIFRIELSPFYHPTQLKGCKATI  
 VKTSHVVRSCSTPTNYHHGKIGAGLKLKSHSMKEIVLTGPFKYTSPHPVPEC

>PYHZ\_2071985\_Isoetes\_sp.4  
 GKVFCDACGHHKVVDMVPLQGARLSLVCGRMLSYGYSNMDGVFHIMINGLYNLNNSSCVATITK  
 TSHVSKCPIPSEYNNGTGGRLYFKSYNSKEVLLGAGPFTYVPLNALRKC

>PYHZ\_2008147\_Isoetes\_sp.1  
 GRVFCDCRCLEGRYTKAGIFMQGAKEVGLQCRRSLDGSSTFEGVTDHSGSFRIVVEGLDGLCSLKLTH  
 SPFSVCHIPSTDDAEFQILPKHLRAPSMMLYAGRFSFRPSLPLPIC

>PYHZ\_2072068\_Isoetes\_sp.2  
 GSVFCDSCLENRFTKNSILLKDAKAVLECRNKDGRLEQHGVAATNEKGEFEMELRQNSSKISIQDCST  
 RIILGDKTKQCEIASTSQUALSLQAIRGGVTYNVDPFIC

>PYHZ\_2009504\_Isoetes\_sp.2  
 GRVYCDRCVEGRFSKFSSFLEGAKVAVQCQTAEGKIKSFEGSTNEAGRFSIAVDAHEKDACAVALLS  
 SPSSECAIPFTNAASQIELSKTIAAATGLKYGGALSFRPEKAEPAC

>PYHZ\_2012705\_Isoetes\_sp.2  
 GTIFCDRCFDEALVQHKTVPPLSGAQVILVCKDESGKVVSTHGYSNKNGVFELKTVKNHASECKLQLG  
 ESTDAECKTATNINKGIAGVDVSEGRFSSSTHELEYTVGPFAFRPSNPSPSC

>PYHZ\_2013089\_Isoetes\_sp.4  
 GKVYCDKCYGMNNVHHITHHHKGLKGAKEVLECRNKDGRLEQHGVAATNEKGEFEMELRQNSSKISIQDCST  
 VKTTHVVRSCSTPTNYHHGKTGASLKLKSHSMKEIVLTGPFKYTSPHPIPEC

>PYHZ\_2067647\_Isoetes\_sp.nd  
 GSVFCDTCLDNRYTNNIIFHDANAVLECKNKDGFQAHAAANTNKRGEFVMELMSQVSIRDCSVKIIV  
 EDAVNECEISSFYHALSLQAIKESFTTYEVPFFIYKPKEPLSFC

## Selaginellales

>S.moellendorffii\_429316.1  
 GFVSCQDCDGNFDKPSGALVRVECRDGSYGEAASNRDGFFQIKFPQTYKSVYDPPESCKAMILASP  
 DRSCDTATDLGGGKKGALEFEKIFMGAEFYKTGPFAFTPYC

>S.moellendorffii\_422150.1  
 GYVFCQNCYKDWRSRHLGVHPGAEVSVECTAISTGKLVALGKGVRENGYVEIRLDGYDYSSKLKIHR  
 CLAKIVRSRDPSCDYRTNVNSGYSGAKPQFSGVAGNIAYFTTNAFSFTPMC

>S.moellendorffii\_409806.2  
 GYAICDTCWEMQITANSISLPNVTAAVECFDAGGRIIFRETSSTDNTGAFRVELPFQIADSVSMLSTCT  
 SRVVRGPLNHLCTYPLAHAYNPFLSPRSLPDGRQVYGVGPVFRPRAKLPHC

>S.moellendorffii\_405039.2  
 GYVVCDAKREKNLTSNSVFLSGMTVSLTCKAVGGQRPFFTAQQATDEQGRFSLDIPSQISGSGDGFK  
 LCAASVAAGEKGITPLQRSCNVAAMEKSHSSLTPYTTIEGHRIFSTGPFVYTPSKSLQSIKSC

>S.moellendorffii\_443385.2  
 GTVYCDSCLEARLTRNSIVFSEAEIQIECVGSRGNPDHSTVSTNETGQFQAQIPPQFDACSVQFLSK  
 ALDSCATPAAAFATSASLDQPRDLVFRPSQALAF

>S.moellendorffii\_409805.2  
GAIFCDRCMDKTF SFATIAIPNVT AIIRCGDFQASNTTSEFGVFTIALPLEVGTSPAKLASCSVKVASDFS  
RVEGDLGTCNTPVKFQFQPWSPSPSPSMPAFQSSSLKIARPWPFYSAGPFFFQPPPEPLPSC

>S.moellendorffii\_430897.2  
GNVFCDQCLHGRPSMWGIPIRGAKVLVHCRNRQGMAMAVPAMSNFLGAFVANFPGEHDLQHCTSR  
LMWSPLKQCNCVANAQQSLRLEWKILDNAFYTVKPLYFTPVKPLAIC

>S.moellendorffii\_443961.2  
GRVTCERCSTKHKAKTHGLSGVSVELSCPQANLTMVTQHHGQFSMGFHHLEPLGFPGSCAVSVITS  
SLPSTCNVPVGSATNSFTPTLHSTSSKETAYVVP AF EFTNGDNC

>S.moellendorffii\_438958.4  
RVFCDRCIEGRFSEY AIFVKGAKVALECTQQDGGIHVVEAVTDSAGAF AIPVDEPGSSCAVKLLSTPTP  
QCNI AAKHAQTLNANMR TKDNVIYVGLLSFRPEEPLPIC

>ABIJ\_2038764\_Selaginella\_lepidophylla.2  
GSVYCDSCLESRLTHNSIVLAEAEIQIKCTGGSGIRDHSAVVTTNQTGQFQAQVPAQFDATVCSAELL  
SKPFDTC SIAAPSP TSPSYNRDFVFRPRQALGFC

>ABIJ\_2038663\_Selaginella\_lepidophylla.2  
GTVFCDQCLEKTF T FNTIPIPNVTATVECGDFQASNITSEFGTFIIQIPADVATSKLPSC TVKVASDFSSV  
QGDLETCTTAVQLQLGFPGSSSSPSSLKAAQDGWP FYAAGPFFFQPPQALPAC

>ABIJ\_2004715\_Selaginella\_lepidophylla.2  
GYVVCDACLEKSLTNSVFLSGMTVSLKCQAAGGQQPFFAAEQQTDSQGRFSFDVPSQISGSIEVSK  
LCSTGIAANKGDTSSLAGSCGSASQALASSSLTYAAIQGHPIYSTGPFVYTPSQALESKTC

>ZFGK\_2039051\_Selaginella\_kraussiana.2  
GNVFCDQCLHGRPSMWAIPIQGAMVVVHCP SRQGVALQRRAYTNFLGAFIASFPTATLQECTSHLVW  
SPMSECN NVVGSGRQQSLRLEWKMFDDSYTTKPLYFKPLSPMSHC

>ZFGK\_2040668\_Selaginella\_kraussiana.2  
GRVYCDQCKEGRFSEFSSLLQGAKVNV ECNEGRILHQGITN NAGLFSIKVPNALATSGCIVKLVSSPLE  
SCSIASHNQQQLIELMKVAKASTSVKYTGPF SFAPENALSFC

>ZFGK\_2038534\_Selaginella\_kraussiana.nd  
GTVFCDTCHERHLS ESSIIFKDAKVLVECDSS FSEILRTDVKGQYTMQLHRGVTAPKHCKSTLLSSTD S  
ALWTSCSTT LSYHLDQSQVSKVQDLIFKPKTSTFC

>ZFGK\_2008341\_Selaginella\_kraussiana.nd  
GFVACDACLERNFTKNTVLLPGVTVSVTCKDGN G DPFSS IERTDKHGRFFVNIPEQLANSEASHITTL  
CSSAVVNNPVPSCSIPLTSSLGSSLVPYAMQNGHKIFTSGPFIYSPRQAHNSC

>ZFGK\_2039185\_Selaginella\_kraussiana.nd  
GFVACDACHEMKYTKNTAFLPGVTTSLTCKDGN GNPFYSALQITNKQGMFIFDIPSQLVHLNASHLTT  
TCSTDIVKVSTR TSCRIP LSSSSSSKLFPFEIKGHKFFITGPFVFKTSKVEQRSC

## Ginkgoales

>SGTW\_2003638\_Ginkgo\_biloba.1  
QQVFCDTCAVGFITRVSKPIQGAKVAVQCKDHAGKQLYYTEGTTDFQGYFNIPVNGDHSHEKCEAKAI  
SSPTSCNIPSYTNIGPVFLTSNNGVVSSERITGPF GFKSTEILAVC

>SGTW\_2037819\_Ginkgo\_biloba.1  
GRVFCDVCADGSMGPEDHFLEGAEVAVLCMTKSGEVLNYQAFTNSKGIFTVAETMPESNRWDTCLA  
RPISSVYQYCNLLGDFATKFSYSLSSGRSYTVRPF SYQPLKTPMYC

>SGTW\_2037953\_Ginkgo\_biloba.1  
GKVYCDTCAAGFVTRVSTYIPRARLAVQCKDHVGKQLSYTEGETDQSGTFRIPVKGDHAHDL CETVA  
LSSPTSCNIPTDSNRGPVFLTHNNGINS DERITGPFAFKSTQTLAAC

>SGTW\_2038568\_Ginkgo\_biloba.2  
GNVFCDQCRDGHRTMFDLPINGAKVAVECTGSDGQITMSKQETD LIGNFMMKFDGTPDL SGCTAR  
VTDSPQSDCKIVGSSSKPLSLSFRLFSMEVYTVESLFFQPAKPM SFC

>SGTW\_2037611\_Ginkgo\_biloba.2  
GTVFCDTCFEQQFSKSSYFISGATVAVECRIKKHGPSFRVEAESNEYGEFKVELPSSTFHSEKQVKRC  
SVRLLRNSESSCKVASIVKSSSLTLKSKQGGIHTYSAGSFTYRPQSPPALC

>SGTW\_2037362\_Ginkgo\_biloba.2  
GSVKCHDCSEQRLDKRLALSGASVA INCKTGQEVSTRGVGIIDETGSFSVKLPSSVLNEKGELGQPCF  
AKLVSGNKKLCSFTNSAPSKLVFATEEGKKNVLTTSDELSFSSLSC

>SGTW\_2033762\_Ginkgo\_biloba.nd  
KVYCYCWDWSNPKHSHGKHHLKGATVVITCKAGYKEITAYGVTKDNGKFKALVEGYDYGKWGGAE  
NCKAKLYKPPPHSSCNIPTNLHGKGTGAWLKVKSKSEEEIVLIARPFAYAPAKPYAEC

## Cycadales

>GNQG\_2082130\_Encephalartos\_barteri.1  
GRVFCDTNAGFVTRASTYIADAKVAVECKDHVGKRLTYKEGVTADAGSFRIPVAGEHVHDLCEAKA  
LSSPTACNIPAYTNTGPFVFLTHNNGIASNERTTGPFGRSGSTLAVC  
>GNQG\_2084485\_Encephalartos\_barteri.1  
GQVYCDTCAAGFVTRVSTYISGAKLAVQCKDHAGKLLSYAEGQTDGSGTFRIPKGDHSHLCEATV  
LSSPAPCNIPTASNAPVYLTHNNGIDSDERATGPFGRSGSTETLAAC  
>GNQG\_2012735\_Encephalartos\_barteri.1  
GRVFCDDVCADGSMGPEDHFLEGAEVAVLCMTKLGEVLNYQAFTNLKGTFTVAETMPESNRWETCLA  
RPIGSVYRYCNILGVNNSAIKFTYSLRSGNSYTVGPFSYQPSKAPMYC  
>GNQG\_2079100\_Encephalartos\_barteri.2  
GVVTCDDCSEKNGKSGVGLSGASVAIECKNSRGDRLHTRAEGSIDENGAFSVNLPQHILNAQGELQE  
ECFAKVRSGSKRCPAADVAATKLVLQSKRDGTNIFSPSDRLSISSSSC  
>GNQG\_2008332\_Encephalartos\_barteri.2  
GSVFCDTCSDRQFTESYFISGATVAVECRVKSPARWIRIEGKTNQYGEFQVQLPSSNFRSGGAESL  
KRC SARLLPNPRGSCKTASIGKSSSLALKSKKGGIYTYSAGALSYPQSTPPMC  
>GNQG\_2015302\_Encephalartos\_barteri.2  
GRVFCDTCEHQFSETSSYYLPGALVAVECSINRKATSTVSIEGETDEYGEFRVEIPSIFQPLRRC SVR  
MLSSPERSCSIPSTTTSFPLRFTKSKSKLNVNFRGDRTYNAGSFSYRPLNAPSAC  
>GNQG\_2082056\_Encephalartos\_barteri.2  
GSVFCDICLQHRFSETSYFLPGALVAVECSLNRKATSVSSEGETDEYGD FRVEIPSIFHAEDRVNRCS  
VRLSSPEGLCNVIQSASTPRPFTLT SNFDGVRTYDAGSFSYRPKSVDPRLC  
>GNQG\_2085018\_Encephalartos\_barteri.2  
GNVFCDDQCLDGLRTMFDLPLYGAQVRVDCRGDDGEITFSKEDSTDLSGNFVVKFDGIPDMSGCAAQ  
VIGSPRGSDCNIVGSPARPLDLTFRLFAMEVYSVDPLFFHPAKPMPFC  
>GNQG\_2084302\_Encephalartos\_barteri.2  
GSVECDGCLQNLDRLALSGSSVAICKKTGKEETI HGVGSVDENG SFSVKLSSSALNERGELAFPC  
FARLVSGNQKLCSFANTPSSKLVFKSPHTLT TSEVLSFSSSSC  
>GNQG\_2008166\_Encephalartos\_barteri.4  
GKVYCYECWDWSNPKNSHQKKHLGGATVVVMCKTGDGKTTEAYGV TENNGKFKVIIDGYKSGKWE  
GAENCKAKIHKAPKSSLCNLPTNLHGGKTGAWLKVKSKSPEEIVLIAKPFAYAPAEPYAKC

## Araucariales

>IZGN\_2070361\_Dacrydium\_balansae.1  
GRVFCDDVCADGSGIPEDRFLEGAEVAVLCMTISGEVLNYQAFTNLKGIFTVAETMSERSRWD MCLAR  
PISSIDQDCNILGNNAATKFSYTLSSGHSYTVRPF SYQPVKTPMYC  
>IZGN\_2069360\_Dacrydium\_balansae.1  
GSVYCDNCHAGFPTRISPAIAGAKLAVRCRNQAGAETVYTEGVSDENGEFKISVKGEHDQDFCETVA  
LSSPTTCNIPSESNHGPVFLTHNNGINS DERITGPFAFKSAQKNSEC  
>IZGN\_2069612\_Dacrydium\_balansae.1  
GKVYCDNCHAGFPSRISPSIGGAKLAVRCKNNVGTQ TLYSEGVSDSEGQFEISVKGERAGEFCETVA  
LSSPNRECDIPTDSNHGPVFLTHNNGIPDDTRATGPFAFKSTEKHPEC  
>IZGN\_2072474\_Dacrydium\_balansae.2  
GSVFCDDKCFRQEFKSHSYFIKGAPLAVECGTGKEGLNFRTEANTNEHGQFEVELPASVFHSETHLKR  
CSAMLLQKEGPCGVTSMANASSFTLKSQGGIHTFSAGFFTYRPQTIPPSC  
>IZGN\_2003971\_Dacrydium\_balansae.2  
GSVFCDDTCFRQEFKSSYFIKGAPVAVECESGKG GPNFQIEANTNEHGQFEMELPEFEFHSETHLKR  
CSARLLQKKGPCRMASIANSSSFTLKSQGGIHTYSAGFFTYRPQTIPSSC  
>IZGN\_2009542\_Dacrydium\_balansae.2  
GKVFCDDTCLQNHFSNTSYFLPGAVVAVECKISRNPPTIAEESTDENGEFVVQITPPSIKTTNTNMTGL  
RKCWVQLVRSPQSSCNVPSITKSSQIGLALDFNGILTYESPSLTYPQDLPTSLC  
>IZGN\_2072084\_Dacrydium\_balansae.2  
GNVFCDECDQGRRTLFDLPVNGAKVAIECNGQSNQVTTDLVGNFVMKFDGIPDLSGCSARVVQSP  
GSECNIVSSPAKPLTLTFSLFGMEMYTVESLSLEPAKPM SLC  
>IZGN\_2000214\_Dacrydium\_balansae.4  
GKVYCYCYCWDWSNPKLSHGKHHKLGATVVVSCKAGYKEITAYGVTKDNGKFRVQVEGYDHEKWGG  
AENCQAKLFKPPTDSHCNIPTDLHDGKTGAWLKVKSKSEEEIVLYAKPFAYAPAKPYAEC  
>IZGN\_2068225\_Dacrydium\_balansae.4



GKVDCKYKCNWQPNASYDKGGLEGAEVVVKCKAGEETVTAYGVTIKHGKYKVVLKGYGYTKWDIA  
 KSCTAKLYKPPKNSTCSLPTNLNKGISGAMLKFKSKSQKAIVYSVKPLAYAPSKPYSKC  
 >IZGN\_2069230\_Dacrydium\_balansae.nd  
 GRVFCDTCFHRKLTSTSHFIPGASVAVGCNIKRDKVKSKEGKTDERGFYRIKIPVHFRIEKDIEKCSV  
 ELVRSSIIWCSVPFIRNRSRLVIKSKIKDGYLYRADPLSFRPPRLPAFC  
 >IZGN\_2005472\_Dacrydium\_balansae.nd  
 GSVFCDTCSHSLHSPTTYFITDATVAVECSLNRKARALIRVEGRTDESGEFKIELPSFFYNTYSGCSV  
 EVINSPDGLCNVPSIGKLAFTLNWRQPATVYGAGHLSYRPELTPSAC  
 >JRNA\_2010185\_Phyllocladus\_hypohyllus.1  
 GKVYCDNCHSGFPTRISPSIAGAKVAVQCKTREGKQTLYSEGVSDSEGQFEISVKGDRAQELCETVA  
 LSSPTRECSLPSESNRGPVFLTHNNGIPDDTRITGPFAFQSTKHPQC  
 >JRNA\_2064064\_Phyllocladus\_hypohyllus.1  
 GRVFCDVCADGSMGPEDHFLEGAEVAVLCMTISGEVLNYQAFNTSKGIFTVAETMSESSRWDMCLA  
 RPISSIDQDCNIPGNNSASKFSYALSSGRSYKVRPFSYQPVKTPMYC  
 >JRNA\_2003839\_Phyllocladus\_hypohyllus.2  
 GRVFCDPCLHHQFSPSDTAHFLPGAVVAVECSTINNRKLRTILSNKAETDEYGAFRVEIPSGIHNLNLNP  
 ITSCSVRLNNSPHQSCNIPSISTSSLITPSNASGLETIYTSAPLSYRLQDIPDCLC  
 >JRNA\_2012549\_Phyllocladus\_hypohyllus.2  
 GRVFCDTCFHQKLTSTSYFIPGASVAVGCKLRGNGKAEAKTDERGFYRIKIPLRFRSERDIEKCSVKLL  
 RSSIIWCSIPFIRNRSRLSIKSKIKDGYLYRAAPLSFRPSKLPAC  
 >JRNA\_2066102\_Phyllocladus\_hypohyllus.2  
 GNVFCDECDGRRTLFDLPVSGAKVAVECNGQSNEVTDLVGNVYLVKFDGTPDLGCSASLVQSP  
 NSECNIVGSPAKRLSLTSLFGMEMYSVESLSLQPAKPMSC  
 >JRNA\_2006993\_Phyllocladus\_hypohyllus.2  
 GSVFCDTCFRQEFKSSYFIKAAPVAVECESEKERPNRSRIEVTNEHGQFEVELPASLFHSETQVKKC  
 SARLLQKEGPCRVTSANTSSFTLKSQGGIHTYSAGFFTYKPIIPASC  
 >JRNA\_2006992\_Phyllocladus\_hypohyllus.2  
 GSVFCDTCRQEFKSSYFIKGAPVAVECESEKERPNRSRIEVTNEHGQFEVELPASLFHSETQVKKC  
 SARLLQKEGPCRVTSANTSSFTLKSQGGIHTYSAGFFTYKPIIPASC  
 >JRNA\_2001594\_Phyllocladus\_hypohyllus.4  
 GKVYCYCWDWKNPKLSHGKHHLKGATVVVSKAGEKDITAYGVTKVNGKFKVQVEGYDHEKWGG  
 AKNCKAKLLKPPTGSACKLPTNLHYGETGAWLVKSKSEEEIVLYAKPFAYAPEKPYAEC  
 >JRNA\_2003193\_Phyllocladus\_hypohyllus.nd  
 GVVKCSECTQKQQNAGHEASPYQGAFVGIQCKTSKGEVHESGVAIIDNNGSFKMNLQYLVNDKGEL  
 AGECHAKLLTRYSLKPCSTNGDGMSSKLVLQTKSKESESDVDTIIFGTSSDLSLSLSTC  
 >JRNA\_2003196\_Phyllocladus\_hypohyllus.nd  
 GVVKCSECTQKQQNAGHEASPYQGAFVGIQCKTSKGEVHESGVAIIDNNGSFKMNLQYLVNDKGEL  
 AGECHAKLLTRYSLKPCSTNGDGMSSKLVLQTKSKESESDVDTIIFGTSSDLSLSLSTC  
 >JRNA\_2003194\_Phyllocladus\_hypohyllus.nd  
 GVVKCSECTQKQQNAGHEASPYQALVGIQCKTSKGEVYESGVGIIDYGSFKMKLPQYLSFKMNL  
 QYLVNDKGELAGECHAKLLTRYSLKPCSTNGDGMSSKLVLQTKSKESESDVDTIIFGTSSDLSLSLST  
 C

### Amborellales

>AmTr\_v1.0\_153.4.1  
 GMVYCQSCLEKGTSLSEAKPIAGAKVGVACKDEKGRVKWYQAHKTDSYGYFYASVIGFAPSMDAL  
 SSCTAYLLSSPDPECNLLTNINGGFEGSPLRYKGNLKGKVLVLYATGPLAFRPARC  
 >AmTr\_v1.0\_019.72.1  
 GKVLCDQCTQGWNEWVHGAKPIKGSKVAVTCMDEQKRTVYYASDETDEQGEFEIPLKKEYVKGKSL  
 STVGCLVRLVSSPDPLCNVPTDFGRGHSGVTLEWPSIVYKDLKHIVGPFYFTSSMC  
 >AmTr\_v1.0\_061.7.1  
 GRVYCDTCRAGFETSATTYIKGSTVRLECKDRATHQLTYSIEGVTDATGTYRLPVSDDRQHEICEVVV  
 VSSPEAGCGKAMLRERARVLLTHNNGIVSNTRYANALFLKDEPLPRC  
 >AmTr\_v1.0\_068.122.1

GVIYCKSCNYSANDTLLGATPLQGATARLECNSSKQVVTAEGKTDKNGYFFIEAPRNKVTNYAFHKCK  
VFLASSPLATCQKATDLHGGITGSPLRFHQVLD SGYPLAVFSTGPLAYAPTNAVTC  
>AmTr\_v1.0\_047.45.1  
GTVTCDACRDTGKSPFVSGATVAVRCQTNGGKRSRHFVRGKTDEYGDFMIDIPSHMHATPRLENT  
CHVTVVQIPENSDCRRNRAGRQAFLRVSSVGNIRVYTAGFLHFQPRGAAAIC  
>AmTr\_v1.0\_062.88.1  
GRVMCDVCADSSIGPEDHILEGAEVAVLCITKSGEVLNYQAFTNSKGVYSVAETMPESNRWDSCLAR  
PISSFHHHCTQLSNSNRAIHFSYSRPSGYSHSLKPFLYKPNTTPLYC  
>AmTr\_v1.0\_00047.2  
GTVFCDTCFNGDFSESSHFIQGASVAVECRDRTVKKFTTKEVKTNQHGQFEVKLPFSVSHHIKRIKRC  
SVKLVSSSEPYCGVASMAESSSLHLKSKRAGLHIYSAGFFTFKPLKQPDLC  
>AmTr\_v1.0\_041.161.2  
GTVFCDACKDGRSSFDYPLSGAKVAVACAGNDGQVTVWKEESTNWFNGNYGMRFEQSPDL SRCFA  
QVVANPQGSNCGITGGPARGLNLVDFMFGMEMYVVD SLLSQPSQPM AFC  
>AmTr\_v1.0\_041.169.2  
GVGECLDCAKKSFTPDHAFSGLHVSIDCKTDGGKFHSKAAGDL DKN GKFLVKLP S DLLNEEGDLTEE  
CFAQLHSGPSSPCPSQAGLEAQKIMLKS KEDGKHEFGTKGKLSFSRSTC  
>AmTr\_v1.0\_066.9.4  
GKVYCYRCYDWRYPNKSHDKKHLKGAIVEVSCDADGKKVMVYGVTKNNGKFRVNVEGFDYEKWGG  
AKACKAKLYKAPKGS LCSIPTDLHDGKKGASLKVKS SHEEIVLKAKPFAYAPKTPYHEC

### Alismatales

>Zosma4g00040.1  
GRVVCDVCGDSSIGPEDHFLEGAEVAVLCITKSGEVVNYQAFTNSKGIYSVAETMSATDRWDSCLAR  
PISSFHQHCTRRGNSWSAVRFSYDQTS GHS HIVKPFIIYKPTSSPTYC  
>Zosma241g00180.1  
GRVFCDNCRAGFETAATKYLKGANVKVECRERTTAKLTYS AQGVSD ETGTYNIPVSNDHQNDICEALI  
MESPENEC SQVIKGRERAQVVLTHNDGIPSIKRFANNMGFQTYTPMSGC  
>Zosma114g00880.1  
GIVYCQRCSAVGTSSLLNARPLLSAKVAITCRDYKNRVRVYL VAPVDFTGYFYTQLDGNDMTSDGIGN  
PEESCKVQLVSSGDMTCNRLTNVNKGITGTDIKFEKTLEKGSFEINLYTASSLAFSPSHC  
>Zosma78g00260.1  
GKVVTDCSKDWNENWNGAKPLQGS KVAVICMDNDRV VYHTMNITNEEGMFKLIVDRHINGKKLM  
VNGCVVKLVSSTHSDCNVLTDFSGGKTGVKLRSPSLVYQDITEYTIPPFSTSPMC  
>Zosma79g00580.1  
GKVYCDTCRSGFETSVTNYIEGAKVKLQCKNATTHVLILTMDGTTDASGTYTMDIKDDYSDEVCSVEL  
VSSPQSDCKEMKKDRNSVQVMITENSGMSSNVRYANSLGFLRTQAMPIC  
>Zosma97g00610.1  
GKVFCDTCRAGFETPASTYISGATVKVECRDRMSGDLKYTVQGKTDVTGVYNLVVKNDHKNHICISS  
LVSSPD SGCAEVVSGRDRSRIVLTYENGIPSSTRLANS MGFMQTALAGC  
>Zosma89g00790.1  
GRVYCDNCRAGFETTISEYLSGARVKLDCQNETTHKVIQTIEAVTDSKGSYHIEISHDHEDETCEVSLV  
SSPKPDCSEIKSSRNSARVVL TENS GMASDTRNANSLGFLKKEPLKIC  
>Zosma175g00430.1  
GQVFCQDCSDSWSLTAAKPLPKVRLEV KCHDYS GKEVFNLAMRTNRLGW FYEPLKGLDLRSYHMDT  
FPHFCKVRLLHSIHRNCNAVTVNYGITGAPLRYEKT LFN GTRYEADLYSTGPMAFRPRHC  
>Zosma175g00470.1  
GRVFCQDCARLESWSMNGATPLGEARVAIACRDHRHRQFY YKVVRTDEWGFFNQPLKGLDVGRYHI  
DTPAHACAAHLLHSNPN CNVATDTNFGNGGSPLRYEITLFNGTKYESDVYSAGPMAFRPKNC  
>Zosma175g00410.1  
GQVLCQVCERMGSWSLLDAQPLVRAKVG I KCRDYRYGKIYSMSTETNYAGWYYEPIRKIDLKIHHIET  
PADSCTVHLISSDDQNCNVITNVNFGLTGASVRFEKTEFVG TREQSDLYSPGILAFRPKNC  
>Zosma6g00520.2  
GTVSCDTCFGYKINLITGAVIAVECHSTVDDDRVFRKEVKTSIDGVFRFHLKG VGLRVCSAKLLSSTHP  
FCSIGETSSNSDSSLRQLKLGIDGVVHVYSVGFFTFRPINQPNMC  
>Zosma166g00640.4  
GEVYCYGCDYSEHSPKSHHKKKLEGAVVKVTCMKGSKDVIAYGKTM RNGMYEITVEDYDVKYGHE  
NCKAMLHAPPKGSSCNMATDIHNGNTGAKLHIKSRNHVEVVYKSKKFAYAPKTPYKDC  
>Spipo0G0071700.1

GGVFCDTQCAGFETPASTNIAGAKVRVECRDRASGVVKYVAAGSTDGQGKYRIFVAGEHENDICESV  
LVSSPDRCSSPLAGRERARVVLTHHNGVVSQRIANNLGRSDSLALAGC  
>Spipo2G0004200.1  
GRVVCDVCGDSSIGPEDHALAGAEVAVLCITKSGEVVNYQAFTDPKGAYTVAETMPEGDRWSSCLV  
RPIGGPHPDCSRADARAGVKFSYTRPSGYSHAVRPFLFKPSLAPAYC  
>Spipo3G0081500.1  
GRVYCDTCRAGFETTATEYLAGSKVRLECTHQESDELVHTVEGVTDATGTYHLTVADDHEDEICEVV  
MVESPRADCSEIKAGRDRARVLLTHNSGLATNVRLANSLGFLKEEPLPSC  
>Spipo2G0081100.2  
GTVYCDTCFQQEFSTRSHFISGAVVAVECGEEEEAAAAAAKPIFRAESRTDQDGVFAVRLPPRISKHL  
RSIQSCSVKLVSSSEPFCAVASSATPSSSSLRLKSAKPGHLHIFSAGFFTFKPLEQPKLC  
>Spipo16G0020300.2  
GIGECTDCASRNINSADALKGLRVAIGCKDGKGFQVRGTGKLDRNGKFTVRLPSKLLRRDGELRED  
CFAQLHGGPRNSPCRLAASKITLKYRTGHKHTFSTAMKLTFSSETC  
>Spipo4G0069000.4  
GKVYCYKCYAWGSPISKSHIKKGFQGA VVKVTCVDGYKEIVAYGKTKSNGKYSVTIKGYDYQKYGAAQCKAQ  
LYAPPVGSICKIATDLNNGKKGAKLHVSKSHELIVLEAKAFAYAPKKPYEEC  
>Spipo0G0133200.4  
GKVYCYRCYDWDHSIKSHGKKHLKGAVVKVTCVDGYKEIVAYGKTKSNGKYSISVKGYDYWKYGAK  
HCKAELHAAPKGSVCNIPTDLNNGKKGAKLHVKSESYGLVVLKAKPFAYAPKKPYKEC  
>Spipo1G0107300.1  
GRVFCDTCRAGFETTTEYLPGAKVRLECTHQESDELVHTVEGTTDATGTYHLKVADDHEDELCEVV  
LVESPRADCLEIKPGRDRARILLTQNSGLATNVRLANSLGFLKEEPLPSC  
>Spipo1G0107200.1  
GRVFCDTCRAGFETTTEYLPGAKVRLECTHQESDELVHTVEGTTDATGTYHLKVADDHEDELCEVV  
LVESPRADCSEIKPGRDRARILLTQNSGLATNVRLANSLGFLKEEPLPSC

## Asparagales

>P.equestris\_XP\_020587648.1  
GKVLCDQCSQGWNYWAHAAQPVKGGKVAVTCTDARRRVVYYSDETDDKGNFDLPVGPATGDAA  
KRIRPEGCSVRLSSPDSACNVLTADFAGGRSGMRLVRPSHVYPGRIKYTVGPFFFTSPMC  
>P.equestris\_XP\_020595204.1  
GRVYCDNCRAGFVTNITEYIEGATVRLECKHFQNDAVEHSIEAVSGADGYTFIVPNDHEEEICYVKLI  
KSPRADCAEFVENREQARILLTENSGQANNLRYANALGFLKDVALPVC  
>P.equestris\_XP\_020591182.1  
GSLVCEACLSAGSELTVSHVQGA AVAVSCRTEQRRRRRIRYANGTTDEFGEFIIDLPSQLHAIPKLEEA  
CVVRILHMPRNSLCRHLRGLNPAAKRIRLSSVGNISIRVYTTGMMRTRSLGTGKLSHHEC  
>P.equestris\_XP\_020583077.1  
GRVYCDTCRAGFETNITEYIPGAKVRVECTHFLT NKVEHSNEGVTDSGSYKITVSNDDHADEICEVVLV  
ESPQENCMEIEKGRDRAQVLLANDGGISGNTRHANSLGFLRNEPLPFC  
>P.equestris\_XP\_020598832.1  
GRVVCDVCGDSSIGSEDPLEGAEVAVLCITKSKEVLNYQAFTNSKGIYKVAETMPESDRWDSCLAR  
PISSFHQHCTVRVDAYSQVVKFSYNQPSGNSHSVKAFLYKPVSAAPAYC  
>P.equestris\_XP\_020583201.1  
GKVYQCSCHEIGSWSLEGAKSLASAKVGIACKDYKKRIWFYKSFEADKNGYYYAPIPEMDGTEGVRK  
KEISGCSIHLLDSPDSACNLLTNINFGIAGAGVGERKKAVKEKGYEVVVYAAPPLAFKPVNC  
>P.equestris\_XP\_020573394.2  
GSVSCMDCSPSHDLSGISLAVNCGGQKTQSYALTNINGQFLISVPNPPPPPSDCSVNLLGARTQLCGF  
KNSITSKIIAINSSIKSSNSSYALQTPLAFTSC  
>P.equestris\_XP\_020582329.2  
GSVYCDTCSQQEFSTFSHFIPGASVAITCNRIGKDKLSFQEEVKTNNGGAFKIRIPVEVASRTGKEIKS  
CSVKLVRSSSEPFCSVASPLTSAVPQLKSIRNSVPVFSAGFLTFRPMKQPDVC  
>P.equestris\_XP\_020593305.2  
GTVYCNTCFHQNSSRHNQVLSGASVLVDCNNQITKSGFQNFVKTDKDG VFRVQLPSEISKHIKTIKQC  
SVKLISNDPFCVAAPPTSSSFHLKSTKNKVHVVFSSGFFAFRSLNQSELC  
>P.equestris\_XP\_020587277.2  
GSVFCDQCKDGSRLFDYPLSGARVAVSCGDQYREESSNILGTYSVRFNGNPD LGGCLARVVRGPD  
NCSVASGPAQSLKFIFRMFDMEAYSVDPLLAQPSKVMDFC  
>P.equestris\_XP\_020594514.2

GSVECVDCGPKSLRNDEIYKGLKVGICKTSDPNEYTTKATTNLNKDGTFFHVHLPTHLLTTDHCFAQL  
HDSTNKPCSHDDSTEHSKLVYKDDGTYFIVDKLFSSAAC  
>P.equestris\_XP\_020590284.4  
GSVYCFNCYDWKQPLDSHIKKPLEDAIVKVTCDAGDKTYVSYGKTKHFGKYSVNVKGFPFWKHRARA  
CRVELHAAPKGSCKIPTNLNKGAPLKVIVKSHELVLKAETLAFAPKIPYEDC  
>P.equestris\_XP\_020597326.4  
GHVYCFKCYNWKHPFDSSHRKLFKGAVVKATCKAGEKEYIGYGKTKAYGKYSINIEGYPPYGYGAEG  
CKVKLHAAPKGSICNIPTKINKGSPLKVEHKSDHEIILRAKSLVFAPSPHKYEEC

### Zingiberales

>GSMUA\_Achr4T17330.1  
GRVYCDTCRAGFETTATEYIAGAKVKLECKNYTTGEIHTNQATTDATGKYQITVDDHQEETCQVTLI  
SSPRSDCSEISEGRNSALVVVTHNVGITSGVRYANSLGFLKEKPLETC  
>GSMUA\_Achr3T03120.1  
GRVVCDLCGDSSVGPEDHVLQGAEVAVLCITKSGEVFNQAFTNSKGIYKVAETMPESDRWVSCALAR  
PLSSFHEHCTRRGDAHSGIKFSYNLPSGHSHTVKPFLYKPAAAPMYC  
>GSMUA\_Achr5T23590.1  
GRVYCDTCRAGFQTAVSQYIAGAKVKLQCRNYETDAVEHLVEAVTDSTGTYHIEVEDSHEEEICEVSL  
LQSPQPGCTEVAQSRNRARILVTGRSGLASDIRYANSLGFLKDEPLQQC  
>GSMUA\_Achr7T01790.1  
GRVYCDTCRAGFETKATEYIEGAKVKLECKNYTTGASTLTAVAVTNNKGTYQIPVSDDHQEESCAVML  
VSSPRSDCSEISDGRNHAADVLTHTNVGITSSVRYANSLGFLKDVPLASC  
>GSMUA\_Achr10T12160.1  
GRVYCDKCRAGFETSATDYIEGAKVKLECRQYDTGVVEQTATAVTDASGTYTLEVEDNHEEEICEVVL  
VESPRPGCSEIMTGRDRARVLISAESGLTTSVRYANSLGFLNAAPLPEC  
>GSMUA\_Achr6T03130.1  
GRVYCDTCRAGFETVVSQYIPGAKVKLQCRHYETDSIEHTAVGVTDGTGTYNIEVEDNHEEEICEVSL  
VQSPVPGCSEVSGTRNRARVLVTGRNGLASDVRYANSLGFLKDEPLKEC  
>GSMUA\_Achr5T11390.2  
GATECLDCERKSIKHENAVKGLRVAIKCRDGNEKEYEIKATGDLDNSGFSNVKLPTELLQDNGELKHEC  
LAQLHSASNAPCPDKNGLNPFSLILKSREKGKHTFTAAAGKLSFSSATC  
>GSMUA\_Achr3T25240.2  
GTVFCDTCFRQELAESSYFISGASVAVECGDAANQLGYRKVATTDRRGVFGVRLPPRISRNGLVEA  
CSVKLLRSNEPFCAVAASATTAGLRLQSRRNGVRVYSAGFFSFKLLNQPELC  
>GSMUA\_Achr3T15900.2  
GTVYCDTCFHRELSKPTHFISVECGDGANKFSYRTVATTNQRGVFRVPLPPRISKHLHLIQACSVKLM  
KSEEPFCAVASSATTAGLRLKSWSHGVHVYSAGFFKFKPLDQPELC  
>GSMUA\_Achr8T28070.2  
GTVYCDTCFHQEFKFSHLSIGASVAVECGDAASGRGYRKVVTTNRRGVFGVRLPPRISKHVHLIEAC  
SVKLLESNEPFCAVASTATAAGLRLKSRRRGVHVYSVGFFSFKPLNEPELC  
>GSMUA\_AchrUnT21190.2  
GATECLDCAQNSIKTEDAVKGLRVAIKCKVRNEKYDTKAAAEELDSNGDFNVKLPSSELLQDNGELKHEC  
FAQIHSKSDAPCPDMNGLNPSKLVLSKEGGKHTFVAAPGKLSFSSVTC  
>GSMUA\_Achr2T20120.1  
GRVVCDVCGDASVGPEDHVLQGAEVAVLCITKSGDVLNYQAFTNLKGIYKVAETMPESDRWVSCALAR  
PVSSFHEHCTQRGDAHSGIKFSYNRPSGHSHTVKPFLYKPASTPLYC

### Poales

>Oropetium\_22028A.1  
GTVLCQDCTKNWNAYAYNAKPIPGSVVGITCLEQRTRRTVYHGRDATDEKGVFNIEVPAEVSGGGKL  
DPSDCLVRLASSGDAGCAVLTNFNGGKTGEKPYRPVKTFPGEVTVYAVGPYYTTLPC  
>Oropetium\_17805A.1  
GEVYCDPCRAGFKTNVSTPLAGAAVKLECRPFLNGPESLKADATTDAGFWYKLEVDQDFQEDICEVV  
LVKSPDAECAEVDMFRDRARIPLTKNNGLKQHGVRVGNPIAFLRKVPLQEC  
>Oropetium\_03834A.1  
GSVYCDTCRAGFVTNVTTPIAGARVRLECRHFMSASGAVERSAEGATDAAGKYKIELVDNRGAEEVC  
VVALVTSPVAGCAEKEAGRDRAPVALIQDAGLATAVRRANPLGFLKATPLPVC  
>Oropetium\_11363A.2

GFVACLDCAAGHDLSGVIVAVKCAAGDDGTALLHAAETDAHGAFDVPIPASSGSPCAARVLGATQRL  
 CAPPGLTVARVVVPERAPADSSSSYQLQLGSRLALFTRC  
 >Oropetium\_25700A.2  
 GMVFCDQCKDGRGLFDYPLYGARVAIQCGGGDTPLTVRESNTNWFGGFSIRMEGSPDMNRCTAR  
 VVQGTGHCGSSGAARELTAFRMLGLALYTVPPLLSQPEESMDFC  
 >Oropetium\_25797A.2  
 GLAKCVDCTRKNVMAEAVFKGLNVAIKCKNVNGEYESKAVGKLNHSGAFSVPLAAADLHGADCHAQL  
 HSAATGKPCPGQEPSTIVPQSDEGTFVAVPGKTTTHYGQEQQSPEC  
 >Oropetium\_23782A.2  
 GLAKCADCTRKNMKA EAVFKARAGLEVAIKCKNVKNGEYESKATGKLDGSGAFSVPLSADLHGADCH  
 AQLHSTAAGKPCPGQEPSAIVPQADGTFVAVPGKMTPTYQQAEAPAE  
 >Oropetium\_12372A.3  
 GVVYCKSCKGRGYNDHMDASPLEGATAMMV CYGRKVVNATGTVTDANGYFVIFFYDLKNFNVRTCK  
 MYMVSSPSPKCNKPVYPPSQWIGLSLVKEGRTIPPVGFQGLYRPTSVLYYGPVKGQC  
 >Oropetium\_03650A.3  
 GMVWCQSCRYKGYFKPMDASPLPGAAYVLQCRHGRRRGATFRGVTGPSGYFLIQTSRQVA AFTSQ  
 ECRVYVPRSPVRACSVPAYPTGNRGLPLKFQEFVKRGNGLQGLYSVGNLFRPESPKRC  
 >Oropetium\_12371A.3  
 GVVWCKGCRYRGYNKSLDASPLPNAAARLRCRRGEWQLSLWNTTGADGRFMIQTDREVTPTSSD  
 CKVYVPRSPALGCPVPVKPARKKGAPIKFRRFVPLSDKLQARYSAGNFTFAPEDAAC  
 >Oropetium\_03649A.3  
 GVIYCKSKLRGYNRNMDASPLRNATASLV CYGGEASKYRVNLNSTATSKEGYFMVMVYDVMFD  
 VRSCRVYLRSSPTPLCAAPFVPANVKLGLTLVKEPAGRAPLPKGARGAYHPETALMYKPAAGGKC  
 >Oropetium\_07184A.3  
 GLVYCQSCAGRGSGSLDGAAPLPGARVTVTCRDRKNRVM AWRKATADENGYFLAKFGVERLRDFM  
 G DPRKACFARLLSSPNAKCNEVTNVNGGMVGAPLRDEGKRWTGSEGYENVAYAAGPLAFRPSK  
 >Oropetium\_22738A.1  
 GEVYCDPCRAGFKTNVSTPVAGAAVKLECRPFLNGPESLEADATTDANGWYRLEVDQDFQEDICEV  
 MLIKSPDPDCAEVDEFDRARVPLTRNNGIKQNGVRYGNPIAFLRKVPRNDC  
 >LOC\_Os02g21280.1  
 GHVVCDCVGDAAIGPEDHVLEGAEVAVLCITRSGEVINYQAFTNSKGVYIVAETMPESDRWESCLARP  
 ISSFHQHCTKRGDTHSGVKFTYSKPSGNSHTVKTFLYK PANAPLYC  
 >LOC\_Os06g36240.1  
 GRVYCDPCRAGFETNVSKSIPGATVSVECRHYGAGRESLKAEATTDEKGWYKVEIDQDHQEEICEV  
 LDKSSDPACSETEKTRDRSRVPLTSNGLKQNGIRYANPIAFFRKEPLADC  
 >LOC\_Os09g39950.1  
 GDVYCDTCRAGFQTNATTAIQGARVRLECRHFMSASGAVERSAEGTTDAAGHYRIELVDNRGAEEV  
 CAVALLSSPDPECHETEVRDRAPVTLVQDAGLATMVRRANPLGFLKTRPLPIC  
 >LOC\_Os03g14130.2  
 GLAMCSGCTRKNMNAEAAFKGLQVAVKCKNSRGEYDKMAVGKVDKSGAFSVPLAADLVGEDGVLK  
 QDCFARLHSAASAPCPGQEPSMIVAAQPGHDGAKTFVALAGKVHRPSAEC  
 >LOC\_Os01g67390.4  
 GKVYCYRCFNEAHPEESHGKEHLKGAMVKVTCQANDQALVGFGYTQDNGKYSVSITGLPLSSTYGA  
 DSCKVELHSAPGGSDCNVPIELNLSGLSVYSKSNEEVVLQANQVMAFASQKTFGFC  
 >LOC\_Os02g33170.2  
 GYVACLDCAPGHDLSGVVAVRCGGGDGGVGQLRAAQTDERGGFDVAVPAAGGDDVDSWRSHPR  
 CAARVLGGAEQLCAPGGLAVAPVVAAGGREKHGSYALASSLAVFTRC  
 >LOC\_Os03g14140.2  
 GSIKCLDCSPDDVKAEDAFRGLQVGIMCNSGAGEAYETKMLSGLDENGGSIPLAADLLRDDGELDK  
 DCFAQLHSAPETPCAGQTPPRIAKAGPGNDTIAAAAADAAPTYLAVSDDTLFSPVAC  
 >LOC\_Os10g05750.2  
 GLAKCADCTRKNMKA EAVFKGVRVAIKCKNSNGEYETKATGEVGKSGAFVPLAADLLGDDGELRQ  
 QCFAQLHSAASNQPCPGQEPSWIVNAAADKKKTFVAVAGDTHFPSSEC  
 >LOC\_Os10g05790.2  
 GAAKCAGCGRKNMDAETAFAKGLKVAIKCKNGSSEEYESKAVGELDGAGAFVPLAADLRGADCVAQ  
 LHSATDAPCPGQEPSKIEPLSSEGETGTFVAVAGKTHLPSSTSSSPEC  
 >LOC\_Os10g05820.2  
 GQAKCGECTRKNMKAQDAFKGLQVAIKCKNSDGVYESKAIGDLGDGAFSVPLAADLHGAADCFA  
 QLHSAASSTPCPGQEPSKIVPLSSTTDNGVDKANTFVAVAGKRMYSSTSPAEC  
 >LOC\_Os10g05950.2



GLAKCGDCTRKNMKAKAAFKGLRVAIKCKNGADGEYETKAAGKLDGAGAFRVPLAADLRGADCVAQ  
LHSAAHNNAACPGQEPSRVMQLSERTFVAVAGKTHYVSPVC  
>LOC\_Os10g05970.2  
GTAKCADCTRKNMKAEDAFKLNQVAIKCKNGNGEYESKATGKLDGTGAFSVPLDADLHSSDCIAQLH  
SATNEPCPGQEPSKIVPMSEGTFAAVAGKTHYRSALC  
>LOC\_Os01g52650.3  
GAVWCKTCRYAGYVKS KDASPLPNAAALLRCRRGKWALSVWGATDARGYFLIQTGTQVAAFTSKDC  
RVYVPRSPSRAACGVALQPGRKTGSPLKFRRFVALPDGLQGRYSAGNFVFGPRDPKKC  
>LOC\_Os05g45460.3  
GTIYCKSCNLSGYNRYMDASPLPNATAQLVCYGDKVLNMTSTATDKNGYFLVMVYRLDVFRRSRCRV  
YLSSPSPLCAAPFIPSNKWLGLTLERERVASLPKGVGRGVYRPKSTLMFGPGTGKGC  
>LOC\_Os05g45480.3  
GMVWCKTCRYPGYLAAMDASPLAGAVAYLRCRHGHRRVASIRGVAGSGGYFRIETSQTSFTSQEC  
RVYVPRSPSRACAVPGHGRRGLPLKFEFVKRDNLQGLYSVGNFVFSKYPNKC  
>LOC\_Os01g07060.3  
GKVYQCSEHRNSWSLDGARPLRGAEVSVTCRDAKNRAAWWRLAVADESGYFLAEFGVTRASDFL  
GADPRGACYARLLSSPDRKCDGLTNINAGMVGAPLRDEGKRWPQGQYDNVVAAGPLAFRPANC  
>LOC\_Os10g05910.2  
GLAKCGGCSRKNIKAQDAFKGLQVAIKCKNSDGEYESKAVGDLGDGAFSVPLAADDLHGAAGCFA  
QLHSAASSAPCPGQEPSKIVPLPSTTDNGGNKANTFVAVAGKRMHYSSSAECTSAFLC  
>LOC\_Os10g05860.2  
GQAKCGECTRKNMKAQDAFKGLQVAIKCKNSDGVYESKAIGDLGDGAFSVPLAADDLHGAADCFA  
QLHSAASSTPCPGQEPSKIVPLSSTTDNGVDKANTFVAVAGKRMYSSTSPAEC  
>LOC\_Os10g05880.2  
GQAKCGECTRKNMMAQDAFKGLQVAIKCKNSDGEYESKAVGDLGDGAFSVPLAADDLHGAADCF  
AQLHSATSSTPCPGQEPSKIVPLSSTTDNGGDKANTFVVAVAGKRMHSSTSPAEC  
>LOC\_Os10g06000.2  
GTAKCADCTRKNMKAEDAFKLNQVAIKCKNGNGEYESKATGKLDGTGVFSIPLDADLHSSDCVAQLH  
GATNEPCPGQEPSKIVPMSEGTFIAVAGQTHYPSALC  
>LOC\_Os10g05930.2  
GLAKCGGCSRKNMKAQDAFKGLQVAIKCRNGDGEYESKAVGDLGDGAFSVPLAADDLHGAADCFA  
QLHSAESSTPCPGQEPSKIVPLSSTTDNGGDKANTFVAVAGKRMRYSSSAEC  
>LOC\_Os10g05990.2  
GTAKCADCTRKNMKAEDAFKLNQVAIKCKNTNGEYESKAAGKLDGTGAFSVPLDADLDSSDCIAQLH  
SANNEPCPGQEPSKIVPMSEGTFVAIAGKTHYPSALC  
>LOC\_Os10g05980.2  
GTAKCADCTRKNMKAEDAFKLNQVAIKCKNGNGEYESKAAGKLDGSGAFSVPLDLDLHSSDCIAQLH  
SATNEPCPGQEPSKIVPLSEGTFVTAGKTSYPSALC  
>Bradi2g07610.1  
GRVYCDPCRAGFETNVSKNIGGATVAVDCRPFGGDSKLKAEATTDQYGWYKIDIDQDHQEEICEVL  
LARSPDPACSEIEEFRDRARVPLTRNNGLKQQGTRYANPIAFFRKEPLKDC  
>Bradi5g08410.1  
GRVYCDTCRAGFETNVTTYIKGAKVRLECKRFGTEKVERALDGVTDGTGYKIELKDSHPEDICEVLI  
QSPLADCNKIQALRDRARVELTRNIGISDNRLANSLGYLKDVPLPVC  
>Bradi3g10980.1  
GRVVCDVCDADSAIGPEDHVLEGAEVAVLCITKSGEVINYQAFTNSKGIYSVAETMPESDRWESCLARP  
ISSFHHHCTRRGDAHSGVKFTYNKLSGNSHNVKTFLYKPVNVPLYC  
>Bradi3g15970.1  
GQILCVLCLRPGSDLLTFQLPGSKVAVTCKSEGPNTSTMAANSATTTDESGNFTIELPSRLHATPNLE  
DACSVTVLTLPPDSACHAGHSPGSPYRLQPSSEEDGVRTYTTGSIWLQHNDTPSEEC  
>Bradi3g21000.2  
GLAKCADCTRNNMKAQAFKGLHVAIKCKNSNDGEYESKAVGTLDGAGAFSVPLASDLHGADCLAQL  
HSTANGPCPGQEPSKIVPLSKAGTFGVVAGKTHYPSVVC  
>Bradi1g63370.2  
GLAKCADCGRKNLKAEDAFKGLQVAIKCKNDNGEYESKAVGELDSTGAFSIPLDLDLHSSDCFAQL  
HSEENTPCPGQAPSKIMPLSKGDHGDVHEKNTFVAVAGKTHYSLSTAC  
>Bradi3g45020.2  
GSVTCLDCAAGHLSGVVAVKCTGGAGLHAAQTDGSGSFDVAVPAASGSRCAARVLGGAEQLCA  
PQGLAVARVVAAAGGSYALGSRLAVFTRC  
>Bradi5g04630.2

GLAKCADCTRKNMKAEEAFKGLQVAIKCKNSKGEYESKAVGGLDGTGAFSVPLASDNAAADCVAQL  
HSAASNAPCPGQEPSKVVPVSKGTGIVTGAATAKTTTASDAAPEC  
>Bradi1g68400.2  
GSVRCLDCSPNDVNAEDAFKELQVAIKCKSGAGETYETQSLTHLDGTGAFKIPLAAGLVREDGELDRD  
CFAQLHSAPDTPCAGAAPPKIPAGGLNSEDTANTYLAVTDDTILSPVAC  
>Bradi5g09480.2  
GTVACLDCAQQRNLSGVVAVKCANGTGVRAAETDGQGRFEVAVPASRSKPGSPCAARILGGPEQL  
CAPPRFAASRVVVAHARPGGGSYALTSPLGVFTQC  
>Bradi1g68390.2  
GLARCSECTRKNMNAEAAFKGLQVAVKCKNSKGEYESKAVGQVDKSGAFSVPLAADLVGEGGELKL  
DCFAQLRSASSAPCPGQEPSRIISAQPPSHDGKMTFVALAGKVHRPSAEC  
>Bradi3g21010.2  
GMAQCVHCARKSMDAATFKGLGVRIKCKNGNGEYESKAMGKLDSSGAFVPLPADIDLRAAECFA  
QLHSASSSEPCPGQEPSKIVPLSEPDGTFVAMAGKTTELQSHSHHPGSEC  
>Bradi3g21030.2  
GLAKCADCTRKNMKAEEAFKGLKVAVKCKNAAGEYETKTVGDVDKSGAFSLPLGAELLHEDGELKQE  
CFAQLHSAPGHPCPGQEPSQIVRPSSTDAVDKKTFFAVAGKMHYSSKEC  
>Bradi2g18920.3  
GVIYCKSCKLANYNNGMDASPLPNATAKLVCCEEMGGSGRRALEMTSTATDGNNGFFLMVYDVAFT  
RNSGSKVYLRSSPTMLCDAPFLPEDPTIGMSLAKEAEEEAHDIYSIQSGALMYKPRSGVSC  
>Bradi2g18910.3  
GMAWCKTCHYRGYYAPMDASPLPGAVAYLRCVRGRRGVSVRGVAGKGGYFLIQSAKMASFTSSDC  
RVVVRASPKRACGAEEFPAADLEGLPLKFERFLTLDGIGALYSVGNFLFRPNSPGKC  
>Bradi2g48670.3  
GAVWCQGCYAGYDKSKNASPLPNAAAQLLCRRGKKWALFASGSTDEGGNFRILTPKQVAPFTSKD  
CTVYVQRSPVGACGVALKPSGGKAGSPLKFRKFVPLSDDDLQAIYSAGEFLFGTGPSGKC  
>Bradi2g57740.4  
GKVYCYRCFNEAHPEESHGKEHLQGAMIKVTCQANDQALVRFGYTESNGKYSVGITDLPLSSAYGAD  
SCKVELHAAPGGSDCNVPMELNLSGVNVYSKSNKEVVFQANQVMAFGSKKTFAGC  
>Bradi3g20970.2  
GLAKCADCTRKNMKAEEAFKGLHVAIKCKNSKGEYESKAVGHLDGTGAFSVPLAADLHGADCLAQLH  
SAANNAPCPGQEPSKIVPLSEDTFGVVGGKTQYPSAECASATLC  
>Bradi3g20980.2  
GLAKCADCTRKNMKAEEAFKGVHVAIKCKNSNGDYESKAVGHLDGTGAFSVPLAADLHGADCLAQL  
HSTANNAPCPGQEPSKIVPLSEDTFGFVAGKTHYPSAVCASATLC  
>Sobic\_001G156300.1  
GQLTCELCLRPGSQLLALDMPGAKVAVTCKSDRTPSNQLDSFAFATTDEYGNFTIDLPPQLHATPDLE  
KACTVKVLQLPADSCRLRHRTGDYGLRLSSVEDGVRAYTAGVIRLQSDTPSDHC  
>Sobic\_001G308600.1  
GKVQCQDCTKNWNAYAYNARPIPRSKVSITCRDKNSRVVYHGSDDTDVQGVFNIEVPKTANVEASRC  
LVRLASSGDAACAVFTDFNRRGTGQVPSRLTRASPTKETYAVGPYYC  
>Sobic\_003G282100.1  
GVVWCKSCRYPGYVESRDASPLRNASVLLRCRHGHRALSVWNTTNAQGYFLIQTGTQAAPFTSNNC  
KVYVPRSPARGCRVAVSPRRKKGSPLKFRFVTLTDGLQARYSAGRFTFAPQDPSKC  
>Sobic\_007G096700.1  
GRVVCDVCGDAAIGPEDHALEGAEVAVLCITKSGEVINYQAFTNSKGMVTAETMPESDRWDSCLAR  
PISSFHLHCTRRGDAHSGVKFTYNKPSGNSHTVKTFLYKPATAPLYC  
>Sobic\_002G140500.1  
GSVYCDTCRAGFETNATTPAGAKVRLECRHYMSASGAVERSAEGATDAAGRYRIELVDNRGAEEVC  
SVLLSSPVPGCAEKEVGRDRAQVELVTDAGAGLATTVRRANPLGFLKSQPLPNC  
>Sobic\_003G009600.1  
GRVYCDPCRAGFETNVSKSVAGATVEVVCRRHFEASKETLKAETDDDFGWYKLEIDQDHQEEICEVV  
LKKSPDPACAEIEEQRARARVPLTSNNGIKQKGTRYANPIAFFRKDPLKEC  
>Sobic\_006G059100.1  
GRVYCDTCRAGFVTNVTEYMAGAKVRLECKHFGTGEVERAIDGVTDATGTYTIELKDSHEEDICQVVL  
VQSPRKDCDQTQPLRDRAGVLLTRNVGIADSLRPANPLGYFKDVLPVC  
>Sobic\_003G282200.1  
GMVWCKSCRYDAPSMDASASPLPNADALLQCQRGDDGRAVSVWNTTDAGGHFLILADWQSAAFKS  
KDCRVKVYVPRSPAAGACTVAVKPNPKGAPLKFRFVPLSGEMQARYSAGDFTFAPEDPAKC  
>Sobic\_001G265900.2

GLAKCADCTRKNMKAEEAFKGLEVAIKCRNSKGEYESKAIGKLDVSGAFSIPLSTDMHAADCVAQLHS  
AAGTPCPGQEPSRIVPQSSDGNFVVVPGKTDYPSAEC  
>Sobic\_001G266100.2  
GLAKCADCTRKNVNAEAAFNGLKVAIKCKNSKGEYESKAVGELQSTGAFSVPVSVNLAGCVAQLHNA  
AGTPCPGQEPSRITPLSDGTFVAIPAGNTQQASSAVC  
>Sobic\_001G438500.2  
GLAKCSDCARRNMNAEAAFKGLQVAVKCKNSKGEYESTAVGQVDKSGAFSVPLAADAVGEDGELKS  
ECFAQLHSASSAPCPGQEPSKIVAAPPGGHDGNEKTFVALGGKVHRSSPEC  
>Sobic\_004G167000.2  
GSVACLDCAAGHDLGSGVVAVKAGNGDGGGAGMHAAQTDGGGNFDVAVPGASASSASQPCAAR  
VLGATEQLCAPQRLTVARVVPARARAPGSAAAASYVLGSRLAFFTRC  
>Sobic\_001G266300.2  
GLAKCADCSRKNMKPEAVFNGLQVAVKCKNADGVFVTKALGEVDRTGAFSVPLAADLLREDGELKQ  
DCFAQLHSAANQPCPGQEPSWIVRSATSEYDDDKTKKTFVAVAGKVHYSKEC  
>Sobic\_001G438400.2  
GCVKCLDCSPNDVNAFKDLQVAIKCKSGAADDES YEMRALGTLDDTG VFRIPLA AELLRDDGSM DRD  
CFAQLHSSLGTPCVGQAPPRIAPTTSDGGSATSDTTYLAAAADTVLAPVAC  
>Sobic\_003G390500.2  
GKVYCYRCFNEAHPDESHGKKHLEGAMVKVTCQANDQALVAFGYTKSNGKYSVILKGLPISNNYGAD  
SCKVELHGAPGGSDCNVPIELNLSGLSVYSKSSEEVVFKANQIMAFASKNTFGC  
>Sobic\_004G001700.2  
GMVFCDQCKDGARGLFDYPLYGARVAIQCGGGDTPLTVRESNTNWFGGFSVRMEGSPDMNRCTAR  
VVQGTGHCGAGAGAGGGGAPRELTLAFRMLGLALYTVPPLLAQPEEAMDFC  
>Sobic\_001G266200.2  
GLARCADCTRKNMKSEAAFKGLQVAIKCKNTNGEYETKAVSELQSTGAFSVPLAADLHGAECHAQLH  
SAANAPCPGQEPSRIAPMSGGTFVAIPGKTHYNPSAEC  
>Sobic\_003G282300.3  
GVIYCKSCKGKGYNTGIDASPLQGATAMMICYGRKVVNATGTVTDANGYFLIMFYDVKNFNARTCKM  
YLLSSPTPQCCKPYPPNQWIGLSLVRETRTIPPAGLQGIYTPTSVLFYAPGAKGQC  
>Sobic\_009G208600.3  
GLIYCKSCKLKGYNMGMDASPLPNATASLV CYGDEDSKFRVLNQTSTATDKNGYFLVMVYDVMFDR  
HSCRLYL RSSPTPLCAAPFVPSNPKLGLTLVRDRKATAPRGARGIFHPKTALMYAPATAGKC  
>Sobic\_009G208700.3  
GVVWCKSCRYHGYFAPMDASPLPGAKVYL RCKHGRRAVTVAGQSGASGYFLIQT SQQVSAFTSQQ  
CRVYVPRSPVRACGVPAYPSGRKGLPLKFQEFVKRGNGLQGMYSVGNRFFRPKYRGKC  
>Zm00008a001995.1  
GKVQCQDCTKNWNAYAYNAKPIPGSKVSITCRDDRSRVVYHGSDYTDGQGIFNIEVPSKATNGCDLA  
PSRCLVRLASSGDAACAVFTDFNRGQTGQV PARLTHASPTKV TYAVGPYYCTLRQCDDVKGDDDDA  
C  
>Zm00008a037818.1  
GRVYCDTCRAGFVTNVTEYIAGAKVRLECRHFGTGKLER AIDGVT DATGT YTIELKDSHEEDICQVVLV  
ASPRKDCDEVQALRDRAGVLLTRNVGISDSL RPANPLGYFKDVPLPVC  
>Zm00008a007539.1  
GRVYCDTCRAGFVTNVTEYIAGAKVRLECKHFGTGKLE RSIDGVT DANGTYTIELKDSHEEDICEVVLV  
ESPRKDCDQVQADRDRAGVLLTRNVGISDNL RPANPLGYLKDVPLPIC  
>Zm00008a002529.1  
GRVWCDNCRAGFETPASTYIAGAKVRVDCKSKTTGANTCSFEGHTDRTGTYNILVIDEHEHELCE SVL  
VSSPDKGCANVVAGRERAPVFLTSNNGVASNVRLANALGFQKDVALPRC  
>Zm00008a016045.1  
GRVVCDVCGDAAIGPEDHALEGAEVAVLCITKS GEVINYQAFTNSKGVYTV AETMPESDRWDSCLAR  
PMSSFHLHCTR RGDHSGVKFTYNKSSGNPHTVKPFLYK PATVPLYC  
>Zm00008a027487.1  
GSVYCDTCRAGFETNATTPIAGAKVRLECRHYMSASGAVERSAEGTTDAAGKYRIELVDNRGAEEVC  
SVALVSSPVP GCAEKEVGRDRAQVSLFTDAGAGLATT VRRANPLGFLKDKPLANC  
>Zm00008a002384.2  
GLAKCADCTRKNMKADAAFNGLQVAVKCKNADGVFETKALGEVDKSGSFSVPLPADLLREDGELKQ  
DCFAQLHSAANKPCPGQEPSWIVRPTTDNDDDDKMKNTFVAVAGKVHYSKEC

>Zm00008a035700.2  
GSVKCLDCSPSDVDAFKDLQVAICKKSGADEGYETKARGPLDDTGVFRIPLAAELLRDDGSTDRDCF  
AQLRSSPDDTPCVGQAPPRMIAPASQVDGSSSTNTTYLAAAAAADTALSPVAC

>Zm00008a002390.2  
GLAKCADCTRKNLKAEEAFKGLEVAICKKNSKGEYESKAMGKLDGFGAFSIPLSTDHLGADCVAQLHS  
AAGNPCPGQEPSRIVPQSSKGNFVVVPGKTDYPSKEC

>Zm00008a035701.2  
GLAKCSDCARRNMNAEEAFKGLQVAVKCKNSKGEYESTAVGQVDRSGAFRVPLAAADVVGEDGELK  
SVCFAQLHHSASSAPCPGQEPSKIVAAPPDHDANGEKTYVALGGRVYRSSPEC

>Zm00008a021942.2  
GSVACLDCDEEHDLSGVVAVKAGDDDDGGAGLHAAQTDGRGNFDVAVPAAASASGAPCAARVLG  
ATEQLCAPWGLTVARVVPARAPGSASYPASYVLGSRLAFFTRC

>Zm00008a000921.2  
GLAKCSDCARRNMNTEAAFRGLQVAICKKNSKGEYESAAVGQVKNKSGAFSVPLAADAVGEDGELKS  
ECFAQLIHSASSAPCPGQEPSRIVAAPPDHTAHTNGNGKTFALGGRVYQPSPEC

>Zm00008a018944.2  
GMVFCDQCKDARGLFDPYLYGARVAIQCGGGDTPLTVRESNTNWFGGFSVRMEGSPDMNRCTAR  
VVQGTGHCGAASSSGGAVPRELTAFRMLGLSLYTPPLLSQPPEAMDFC

>Zm00008a013040.2  
GKVYCYRCFDEAHPDESHGKKHLQGAMVKVTCQADDQALVAFGYTRSNGKYSVILKGLPISSSSNYG  
AADSCVELHGAPGGSDCNVPIELNLSGLSVYSRSSEEVFKANQIMAFASKNAFGC

>Zm00008a013934.3  
GVIYCKSCKGKYNTGIDASPLQGATAMMV CYGRKVVNATGTVTDANGYFLIMFYDMASFSSKTCKM  
YLVSSTPQCCKPFYPPNQWIGLSLVRETRTVPPAGLQGIYTPTSVLFYAPAAKGQCPY

>Zm00008a013935.3  
GTVWCKSCRYAGYVQSSMDASPLPDAAALLQCRRGDGRAVS VWNTTGADGHFLIQADWQSAPFNS  
KDCRVKAYAPRSSPPAARACTVAVNPSPNKGAPLKFRRFVPLSGEMQALYSAGDFTFAPEDPASKC

>Zm00008a011025.3  
GLVLCQSCAARGSQSLDGAAPLPGAQVLVTCRDRKNHVMAYRRGVADHNGYFHAIEFGVEPAADFL  
DKDPRGACFARLLSSPDARCNGVTNVHGGMEGAPLRDEGKQWTDARGFRNVVYAAGPLAFRPGKC  
A

>Aco018698.1  
GVVYQCNCFSFRGTWSLESAATVAAARVGVTCLGWKNQVIIRRAASTDAAGYFYAALDAAGDFYKGD  
PARACYVRLLASPNAACDDPTNINYGFTGAALKDEGKRAAAKLLDVMISAGPLAFQPASC

>Aco003161.1  
GVVYCKMCQLPGYVKS LDASPLPGAVAQLRCNNGGRKNAALLIAATTDVRGYFKIQTTKVTSAMARN  
CRLFLVSSPFQGC SIPVYADGEAATGFPLKFETNAAAGGAAAKAIFAAGFFFEFAPVDIASC

>Aco002832.1  
GRVFCDTCRAGFETPATTYLAGAKVRIECRARSTGIQTYNAEGSTDERGVYRIPVTGEHEHEICESVL  
VSSPHSGCAVALKGRERARVHLTRNNGIASETR FANSLGFEKDTPLPAC

>Aco012434.1  
GALVCDACFLPGPHLRTSNIRGAKVAVACEIEEKRRKINWAYGTTDEYGEFIVDLPSHLHAIPRLDKDC  
AVRILHIPNDSHCRPTSHVNPRIWLSSVGNSIRVYTTGAVRLSNKQTPANAC

>Aco017800.1  
GRVYCDTCRAGFETSATEYIEGAKVRLECKHFATGAVEHAVEGVTDKTGTYKIALTDNHEEEICEVVL  
VDSPLAGCSEVTPGRERARVLLTQDSGIATNVRYANPLGFLKEQPLPVC

>Aco016210.1  
GRVYCDTCRAGFETSATQYIEGAKVRLECKHFATGVVEHAVEGVTDGTGTYRIELADSHHEEEICEVAL  
VASPLSGCAEIAAGRDRARVLLAHD SGLASNRYANPLGFLKEKPLAVC

>Aco003923.2  
GAVFCDTCFLRKLSESSRFISGATVAIECRRDESARPSFRKEVLTD RRGVFRIRLPAEVTKHVKSVRPC  
SVNLIRSSDPFCAAPSTAALLHRFKSRWQAADVRVLSAGIFAFKPLQRPEFC

>Aco019419.2  
GTVFCDQCKDQGRSIFDYPLSGATVAVECGSGGAVLKEDTTNWLGFYTVRVDGSQDLSACTARVVA  
APSSCGAAAGPPRPLALMFRMLGMALYAAEEPLLSEPREPVGFC

>Aco019424.2

GSAVCSDCATKKIEHERAFNGLHAAVKCKAATGLYETKAMGELDNTGSFNIPLPADTLAADADDLNHD  
CFVELHSTASPEATTPCPAKPSKLIPAAKANGGERVFTAASGPLSFASATC  
>Aco005612.3  
GIVFCKRCKFPGYNRDMDASPIPGAIALRCYNGRRVSLKARTDNNGYFLIQTSSLTTFTSNKCRVFN  
KPSPTTSYCNIILVYPRSPGASLKFEKVLKLPFGLEGLYTAGVFVFAPSVPCTC

### Ranunculales

>Aqcoe4G128000.1  
GTVVCEACLARETGVIYAPVSSAMVAVSCKNGRGIMKKNNWVQETTNEYGDFMIDLP SRLHAIPSLH  
KACVVKVLRLPKDSPCKRFPIGKAKTIKLLSNRNNLRYSVGSIRLQQT SKLSRSC  
>Aqcoe1G228100.1  
GEVYCDTCRVLFP TTVSTPAKNAEVLLECRDRENENNRTLSQSTTDIDGNGRYAIEVDGDHEDEICEV  
RLVQSLDTECNQIIPGLDRARVLISDN SGIASNVRYANPLGFIKAVPLPEC  
>Aqcoe1G120900.1  
GKVLCDQDCTGDWNDWVQGS KPIKDSKVS VTCFDDRGRVVYYESDKTDERGEFDMIVQKSINGKELK  
PNQCSVRLVSSPDNV CNLLTDFAGGRSGVKLSRPSHVLPDLVKYTLG PFFFTTPMC  
>Aqcoe6G083400.1  
GQVYCDTCRTAFVTKASN LIEGAKVALNCRDRAAGDLTYSLEGVTDSTGSYKLAVEGDHEEEICEIKLI  
SSPREDCNETIPGLDNARVLVTSNNGISELSRFVNSLGFLKKEPLPEC  
>Aqcoe2G160700.1  
GRVVCDVCGDSTIGPEDHVLEGA EVAILCITKSGEVLNYQAFTNSKGIYVAETMPESERWDVCLARPI  
SSYHNECTHHGDANVGVKFTYKLP SGYSHTIRPFLYHPTNVPMYC  
>Aqcoe5G210700.2  
GVGECSDCAQNNIENKHAVSGLPVAIDCKAADGTFKTRGVGELDEEGKFKVLPSEIVKDNGELEEEEC  
FAQLHSASSSPCATNNGLEALKIVFKSKDNEKITFHPAGKLVFSPNTC  
>Aqcoe5G210800.2  
GTVECADCAVNNIKTKHSPSGLQISIDCKVADGELKTVGVSQLDEKWQYKVLPSGMVKD GQLKEDCF  
AQLHSASSIPCP SNNDLEASKLIFKSNSNGKLT FSPAGKLAFSPITC  
>Aqcoe3G376000.2  
GTVYCDTCFQQDFS KTSHFISGASVAVKCGNRNLKTSFYKEVKTNQHG VFVHLPTGVSKHVKKIKG  
CSVRLINSNEPFC AVAASAKSSSLNLKARKEGTHIFSAGFFTFKPLKQPEFC  
>Aqcoe1G439100.2  
GSVSCLDCAKHDDLSDV NVLVKCDKVKQFATTTTEKDG SFETKLNVDPSSTNCQAQLLGGPEQLCSY  
KKSLVSKIVKDHD SKSYTISTPLAFFTSC  
>Aqcoe5G117200.2  
GTVFCDQCKDGHRS LFDYPLSGMKVRVTCD S MEKEETT NWLGSYTVSFEGSPDLSGCYAHLLEDGQ  
GSTKCGAVAGPAQQLKLMFKIFG MEMYAVDSLLSQPARPMSIC  
>Aqcoe1G153900.3  
GMVYCQSCSKYYGT WSLTDAKPIPSAKVSVTCKNHKNIVTFYKIFVTDEGGYFYAPLDGYKMDDYVLD  
HPLHSCEVRLVASPLPTC NSPTNINYG LNGASLRYENKRIFGSNYEAVIYAAGPLAFRPGYC  
>Aqcoe4G097400.3  
GVVFCKPCQHKGV DTLHGATPITGAVVRLQCN NTRIPFELQAKTDKNGYFFLHTAPKLSNYGIHKCKA  
FIVSSPLNSCRTPTDLHQGV TGAVLRYERPSPKPNQYALFTVGPFAFEPTSC  
>Aqcoe1G135900.2  
GTVFCDQCKDGHSS LFDYPLSGMKVRVTCD S MEKEETT NWLGSYTVSFEGSPDLSGCYAHLLEDGQ  
GSTNCGASQQLKLMFKIFG MEMYAVDSLLSQPARPMSIC  
>Aqcoe3G375900.2  
GTVYCDTCFQQDFS KTSYFISGASVAVNCANRNLKTSFYEEVKTNEHGVFEVHLPTAVSKHLTSIKGC  
SVRLIDSSEPFCAVASSATSSSLHLKARKEGTHIFSAGFFTFKPLKQPEFC  
>Aqcoe4G227000.2 / JZ012168  
GTVYCDTCFQQDFS KTSHFISGASVAVNCANRNLKTSFYEEVKTNEHGVFEVHLPTAVSKHLTSIKGC  
SVRLIDSTEPFCAVASSATSSSLHFKARKEGTHIFSAGFFTFKPLKQPEFC  
>Aqcoe4G047900.1  
GQVYCDTCRTAFVTKASN LIEGAKVALNCRDRAAGDLTYSLEGVTDSTGSYKLAVEGDHEEEICEIKLI  
SSPREDCNETIPGLDNARVLVTSNNGISELSRFVNSLGFLKKEPLPEC

### Asterales

>Lsat\_1\_v5\_gn\_1\_4180.1



GRVYCDTCRAGFETSATTYIPHAKVRVECKNRQQKVLYSMEGMTDATGTYHIRVNEDHGDETCDVVL  
VSSPLGNCNKADPGRDRARVVLTSYNGIVSDTRFANAMGMKDEVMSGC

>Lsat\_1\_v5\_gn\_7\_109420.1  
GRVVCDVCADGSGVPEDHVLGAEVAVLCITKSGEVLNYQAFTNSKGIYVAETMPESERWDACLAR  
PISSFHEHCTHLGDGFGSVKFGYNHVSQYSHAVRPFVYRHASIPMYC

>Lsat\_1\_v5\_gn\_2\_124301.1  
GKVYQCQCKYFGSWSLTGAEPIPAKVSVICKNHKKRVSYNTFATNEEGYFYAELKDFKMTHYLLDH  
PLHACHVKLVSSPLATCNLLSNVNGINGSPLKFENKVLHGKDYEAVVYGSGLAFRPSNC

>Lsat\_1\_v5\_gn\_5\_186660.1  
GKVYCDPCRIQFPTKISYPIPAKVVLVCRAREQSGESYNVEGTSDANGMYSITATGDHEEEICDVHV  
TESPDSKCPEVMDDESRARVSLTDKNGVVRGNSRAANPIGFMVKEVDPRC

>Lsat\_1\_v5\_gn\_2\_90181.2  
GIVYCDTCFNRDFSHSSHFISSGASVVECGGNGVGASGMESQFREEVKTNWKGFTVKLPYAVTDKI  
RECSVKLIRSNQPDPCPVVATSTESSITLAKTPGNRIFSAGIFTFRPRKQPREC

>Lsat\_1\_v5\_gn\_4\_173421.2  
GTVYCDTCFRQKVKSTHFISSGAKVAVECGGDGGKQSFRVEVKTNEKGEFEAKLPVSVGRSVEKIKG  
CSVRLISSGQPYCAVAATATSSEIRFKSKKAGTHVFSAGFFTFKPELC

>Lsat\_1\_v5\_gn\_8\_126000.2  
GSVFCDQCKDQGVSLFMDYPLTGKVKVAMACPGQGGQKLVISEETTFLGSYVMRFDGAPDMSGCR  
AQVSGDGQGCRAVAGPAQSLNLVFMFDTSIYTVGHLISQPAQMPNC

>Lsat\_1\_v5\_gn\_3\_45680.2  
GIGECADCKDINIKSTHALSGLKVTVDCKLENGKLTGKVGELDGEGNFKISLPQEILKDGLTEECYA  
QLHNAANKPCAVHDGLEATKITFLSKSDQKHTFQPVGKLFSSAVC

>Lsat\_1\_v5\_gn\_7\_21560.3  
GMVYCKACKYKGIDTLVGATPLQGAVVLLTCNNTKYPLRVKSTTDKNGFFFIMPPKLTTFGVHKCKV  
TLLSSPKATCNTPTNLHYGIKATLVPTPKPKIVLTPVLPFDVFTVGPFAFEASKKTRC

>Lsat\_1\_v5\_gn\_4\_53840.3  
GVVYCKACKYKGVDTLLGATPLPGAEVLLTCNNTKYPLRVKGTDDKNGYFFIKPTKLTITYGSHTCRV  
SLLTSPMATCNAPTDLHAGVKGSLLLPNKKPPLSSPDAHPLPYDVFSVGPFAFEPSSKTPC

>Lsat\_1\_v5\_gn\_8\_91860.3  
GKIYCDPCRIQFPTKISFPLRDVKVILACHKENS NVETYRVEGMSDENGNYKLKAVGDHAEIEICEISVT  
ESPEINCPDLMDDENHVRVSLTTKHGIKGRARYANPLGFMAEVADPRC

>Lsat\_1\_v5\_gn\_2\_51461.4  
GKVYCYSCYDWKYPIKSHAKHHLKGAVVEVTCKAAGEKEISVYGKTKINGKYAITVEGLDYSKYGGAK  
GCIAKLHMAPNGTKCNIPTNLHGGLKGAEKVKSKNAYEIVLQAKAFAYAPKTPSKIC

>Lsat\_1\_v5\_gn\_2\_50521.4  
GKVYCYSCYDWKYPIQSHAKHHLKGAVVEITCKAIGQKEIFAYGKTKINGKYAITVDGLDYSKYGGAKA  
CTAKLHMASTGTKCNIPTNLHGGLKGAVLKVKSKNAYEVVLEAPFAYAPKTPSTLC

>Lsat\_1\_v5\_gn\_2\_51640.4  
GKVYCYSCYDWKYPIQSHAKHHLKGAVVEITCKAVGQKEIFAFGKTKINGKYAITVEGLDYSKYGGAK  
ACTAKLHMAPKGTKCNIPTNLHGGLKGAMLVKSKNAYEVVLEAPFAYAPKTPSTLC

>Lsat\_1\_v5\_gn\_2\_51341.4  
GKVYCYSCYDWKYPIQSHAKHHLKGVVEITCKAVGQKEIFAYGKTKINGKYAITVEGLDYSKYGGAK  
ACTAKLHMAPNGTKCNIPTNLHGGLKGAVLMVKSKNAYEVVLEAKPFAYAPKTPSTLC

## Vitales

>GSVIVT01006374001.1  
GRVYCDTCRAGFETSATTYIAGARVRIECKDRNSLQLVYSVEGVTDSTGTYKFSIADHDGDMCDAV  
LVKSPQPDCAKVDAGRDRSRLSLTRSNGLVSDTRFANAMGMKDEPASGC

>GSVIVT01008996001.1  
GRVYCDTCRAGFETSATTYIAGAKVRVECKDRNSMQLLYSIEGITDSTGTYKIMVTEDEDQLCDAVL  
VSSPQSDCASVDPGRDRAAVILTRYNGIVSDNRYANSMSGFLKDHPMSEC

>GSVIVT01021211001.1  
GQVYCDTCRIQFITRVSEYVPGAKVRLECRDREGGSVTYSIDGETDETGSYRLPVEGEHEEEVCEVQ  
LIKSSKPECSEISRGVFARRSARISLASNNGMASSDRLANPLGLKQESLSEC

>GSVIVT01037612001.1  
GRVVCDVCAGDSSIGPEDHILEGAEVAVLCITKSGEVLNYQAFTDAKGIYRVAETMPESDRWDACLARP  
ISSFHEHCTHLGDGTSGIKFTYSRPSGYSHITIRPFVYRANAPLYC

>GSVIVT01032773001.1

GMVYCQSCDQFGSWSLTGAEPIPAKVSVICKDHKDQVSFYKAFETDGNGYFYAELDGFKMSHNILD  
 HPLHSHCVKLVSSEPLENCLLSNVNYGLYGSPLRYENKRLFGKHYEAVIYAAGPLAFRPAHC  
 >GSVIVT01036543001.2  
 GTVFCDTCFQEDFSKTSHFISGASVVVECGDGLKPSFQKEAKTNEHGVSFVHLPISVSKHVRKIKRC  
 SVRLISSSEPYCSVASTATSSSLRLKSRKQGIHIFSAGFFSFKPLKQPYLC  
 >GSVIVT01024076001.2  
 GVVECADCSESHIKASQAFSGLGVTIDCKLANGEFKTRAVGDVSNEGKFKVSLPEEMVKDGYQLKEE  
 CFAQLHSASAAPCPDAQSGLASKIVLKAKTIGKKNVFGPIANLKFSSLTC  
 >GSVIVT01024071001.2  
 GTVFCDQCKDQGQSLFDYPLYGIKVTMACANSNGQITMWREETTNGWFGTYAMRFDGAPDLTGCTA  
 QISGSGQGSGTGCRAAAGPAQSVRLMFRMFDMEMAVDSLLSQPAQPMSC  
 >GSVIVT01024081001.2  
 GIGECADCKQRNIKTSAFSGRLVTIDCKLANGEFKTRAVGELDEEGKFKVSLPEEIVKDGELEKEECFA  
 QLHSASATPCPAHNGLESSKLILKTKVDGKHTFGPAGKLKFSPTC  
 >GSVIVT01007286001.3  
 GVYCKACKYRGIDTLLGASPLLGATVKLQCNNTKYPLVVLGKTDKNGYFFIQAPKKITTFGAHKCKVS  
 LISSSPTCNLATDLHFGLKGAILRPEKPPAGLPPPPYVTFVGPFAFEPAPKKEC  
 >GSVIVT01024076001b.2  
 GIVECADCSESHIKASQAFSGLGVTIDCKLANGEFKTRAFGVVSNEGKFKVSLPEEMVKDGYQLKEEC  
 FAQLHSASAAPCSDAQSGLKASKIVLKAKTIGKKNDFGPIENLKFSSLTC

### Malpighiales

>Lus10003874.1  
 GRVVCDCVCGDSSMGPEHDVLEGAEVAVLCITKSGEVVNYQAFNAKGIYVAETMPESDRWDACLA  
 RPISSFHEHCSSLGASSKGVKFSYKKPSGYSHSVRSFVYRHSSPPSYC  
 >Lus10042201.1  
 GKVYCDTCNFGFETPKSTSIPGATVKIQCRNRKSNELVYEREGETNSEGMYEIHVDEEDHMDQVCDAK  
 VVNSPQLDCFKPSAGRDQARVILTDSNGIVSKVRFANAMGFSKEGTVDGC  
 >Lus10001895.1  
 GKVYCDTCRTQFITRLSDFMKDAVVRLECKDREGGSVTFSETAITDEHGVFHIPVTGDHEDEICEINLIK  
 SPRPDCSEIPKQEHNPDETARISITKHNGMTTGERQANPMGMFMVAKPKPEC  
 >Lus10023887.1  
 GKVLCQDCQKSYADWVNGERPIKSGKSVSLTCMDERKRVIHYSDTTDDRQYEMVVSKEYINGKLLN  
 EKLCQVRLVSSPDSNCNVMTDFAGGKSGVKLGQPAYVYRGSTKYEVGSVYFTHPRC  
 >Lus10039078.1  
 GSVVCQACSSTTVDHQDLHQLHEWPVPGAVVAVNCRGKKKHKRSTTQARTVTDEYGDFFIDLPSELH  
 GIADFDKMCSVEVLRMPKDSACRPAYVQNKHKALKLSSFGNGIRNYSAGKIQFLDTTSKPLQSC  
 >Lus10040948.1  
 GVYCYQCKNSGWSLSGANPLHSATVSVICKNSHHQVSFYKTYQTNEYGYFYAQLDGFKLGHGILD  
 HPLQACTVKLVSSPLQTCNIPTNLNYGIKAKLRFENKVLRFPHYEAVIYAAGPLAFRPSNC  
 >Lus10017440.1  
 GIVYQKQCNPGSLTGATPIPYAKVNVNCRNSRHMLTFQKVYTANQHGYFFAQLDGFRGLGHGIFDIPP  
 LQACTAKLVSSPLRSCNVATEINSGPYGATLRSENKVYKYPPEYETVIYAAGPLAFRPSNC  
 >Lus10034365.2  
 GTVYCDTCFQDAGTRFISGASVAVECRRGRFRQEVKTNEQGKFKVKLPFSVSKQVQSIRRCVSKLVS  
 SSDPSCAVTSTANSTSSLHRINKQGDDLHVFSAGIFTFKPAQHNSLC  
 >Lus10026279.2  
 GSVFCDQCKDQGLSLFDYPMTGVRVTMACVDENGETLMSREERTNMFGWYNIRFDGTPDLRNCYT  
 QFAPDSSSTGEGSSSGGGSANSCIAAAGPPQKLRLMFNMFGMEMYSVDSLLSQPAKPMSC  
 >Lus10015434.3  
 GVYCKPKCKYSGVDTLLGATPVLGATVKLQCNNSRVPLVFKATTDKNGYFKVKAPKTITNYGVHKCKA  
 SLVSSPDAKCSFKSTLHGGTTGGSLRVDKKFVESNQTYVMFTVGPFAFEPKC  
 >Lus10025526.4  
 GKVYCYRCYDWAYPTKSHDKHLKGAVVEVTCKAGEKEIKAYGKTKINGKYSITVDGFEYGYGAKA  
 CTAKLHAPHKSGKCSIPTKLHGGNKGAELKVSKDYHLIVLQAKSFAYAPKKPYAEC  
 >Lus10008615.1  
 GKVYCDTCNFGFETPKSTSIPGATVKIQCRSRKSNELVYEREGTTNSEGMYEIHVDEEDHMDQVCDAK  
 VVNSPQLDCFKPSAGRDQARVILTDSNGMSSKVRANAMGYSKEGTVDGC  
 >Lus10007515.1

GVVYCQKCQNPGSLTGATPIPYAKVNVNCRNLRHMLTFQKVYTANQHGYFFAQLDGFRLGHGIFDIP  
 PLQACNVKLVSSPLRSCNVATEINSGPYGATLRSENKVYKPPYETVIYAAGPLAFRPSNC  
 >Lus10009837.1  
 GVVYCQRCHNSGWSLSGANPLHSATVSVICKNSHNQVSFYKTYQTNEYGYFYAQLDGFRLGHGILD  
 HPLQACTVKLVSSPLQTCNVPTNLNYGIKAKLRFENKVLRSPhYEAVIYAAGPLAFRPSEC  
 >Lus10005086.2  
 GTVYCDTCFHDADTRFISGASVAVECCRGRFRQEVTNEQGKFKVKLPFSVNKQVQSIRRCsvKLVs  
 SSDPSCAVASTANSTSSFHRIKNNQGDNLHVFSAGFFTFKPAQHKNSLC  
 >Lus10001821.2  
 GRVVCDVCGDSSIGPEDHVLEGAEVAVLCITKSGEVVNYQAFTNAKGIYTVaETMPESDRWDACLAR  
 PISSFHDHCNHLGASSKGVKFSYKKPSGYSHSVRPfVYRHSSPPSYC  
 >Lus10042394.2  
 GSVFCDQCKDGHLSLFDYPMTGVRVTMACVDENGETLMSREERTNMFGWYNIRFDGTPDLRNCYT  
 QFAPDSSSTGEGSSSSGGSANSCIAAGPPQKLRLMFNMFGMEMYSVDSLLSQPAKPMsFC  
 >Potri.011G137100.1  
 GRVVCDVCGDSSIGPEDHVLEGAEVAVLCITKSGEVLNYQAFTNDKGIYTVaETMsESDRWDACLAR  
 PISSFHEHCTQLGETSTGVKFSYNRPSGFSHRVKPFVYSPANVPTYC  
 >Potri.011G111300.1  
 GKVYCDTCRVEFQTKISDAIPGAKVKLVcNNREngTLTYTVEGTTDSSGTYRLPVVGdHEEDICEVRL  
 VESPRADCNEPFKSVDSARILLTKNVGVVDNLRYANALGYMKKVAQPEC  
 >Potri.002G093100.1  
 GLVYCDTCLAGFETPKTTYIAGSKVKVECRDRKTQDLVYSKEGTTDSTGKYITVDEdHKDQICDAMLV  
 SSPRKDCSSPSAGRDRARVILTSYNGLVSTTRYANSMGFMAAQPMsGC  
 >Potri.001G392400.1  
 GKVYCDPCRVEFQTKISEGIPAAKVKLVcNNRDNGTETYTVEGATDNSGTyRLPVAGdHEDDICEVRL  
 VESSRPDCNEPFrsIDSARILLTKNVGVVDKTRYPNALGYMKKEAQPEC  
 >Potri.016G006200.1  
 GTILCEACLNggTQLLHAWPVSGALVYVECHTGGKWSKTTSSQAMTDEYGDfLIDLPSHLHGIPNLER  
 TCSVKVLRLPQNSVCRPAHARKQKALELSSVGNGIRNYSAGEIKFLQVTSKPLQAC  
 >Potri.010G185400.1  
 GMVYCQsCKYSGSWSLTGAKPIPSAKVSVICKNSNKQVTfYKAFETDAYGYFYANLDGfKMSNIVLD  
 HPLHGCHAKLVSSPLPNCsLLSNINyGLYGAPLRfKNKVLRGTHYEVVIYAAGPLAFRPAQC  
 >Potri.006G005600.1  
 GTVLCEACLHGENQLHAWPISGALVNVECHTSTKRSKSSAQAITDEYGDfLIDLPSHLHGIPHlerIC  
 SVKVLRLPQNSVCRPAHARKQKALKLSSVGNGIRNYSAGEIKFLQVTSKPLQAC  
 >Potri.008G072000.1  
 GMVYCQsCKYSGSWSLTEAEPIPSAKVSVICKNfKKQVTYYKAYETNAYGYFYAQLDDfKMSNNILD  
 HPLHGCHVKLISSSLANCSLLSNVNYGLYGAPLRfENKVLRGSHYEAVIYAAGPLAFRPAQC  
 >Potri.001G392400.1  
 GKVYCDPCRVEFQTKISEGIPAAKVKLVcNNRDNGTETYTVEGATDNSGTyRLPVAGdHEDDICEVRL  
 VESSRPDCNEPFrsIDSARILLTKNVGVVDKTRYPNALGYMKKEAQPEC  
 >Potri.017G100600.2  
 GTVFCDTCFQEAfSRNSHFISGASVAVECKDEESRPGFREEVKTDEHGefKVHLPFSVSKHVKKIKRC  
 SVKLLSSSEPFCaVASSATSSSLHLKSRKQGTfHfSSGFFTFKPEKQPILC  
 >Potri.009G129900.2  
 GIGECADCAQsNIKTvHAFSGLKVTIDCKPENGEfKTRGVGELDEEGKfKfVSLQNDVVKDGLKKEECY  
 AQLHSASAAPCPAHNGLESSKIVfKSKTDEKHTfGLAGKLKfSPVTC  
 >Potri.004G169200.2  
 GTVFCDQCKDGQVSLFDYPIYGIKVTMTCADASGQITMSREETTnWFGNYVMTFDGSPDLSNCYAQV  
 SSSGQGSNACGAAGPAQKLRLTFRMFDMefYAVDSLLTEPSASMSFC  
 >Potri.004G168600.2  
 GTGECADCAESNIKTvHAFSGLRVtIDCKPENGEfKTRGfGELDEEGKfKfVSLPSEVVKDGLKKEECY  
 AQLHSASAAPCPSHDGLESSKIVLKSktDEKHTfGLAGKLKfSPVTC  
 >Potri.004G114300.2  
 GTVYCDTCFQeYfSRNSHFISGAHVAVECKDEKSRPSFREEAKTDEHGefKVHLPFSVSKHVKKIKRC  
 SVELLSSSEPYCAVASTATSSSLRLKSRKEGTfHfSAGFFTFKPEKEPFLC  
 >Potri.004G114400.2  
 GTVYCDTCFQeYfSRNSHFISGAHVAVECKDEKSRPSFREEAKTDEHGefKVHLPFSVSKHVKKIKRC  
 SVELLSSSEPYCAVASTATSSSLRLKSRKEGTfHfSAGFFTFKPEKEPFLC  
 >Potri.004G044700.3

GVVYCKSCNYSGVDTLLGAKPVLGATVKLQCNNTMKPQDVKTITTDKNGYFLIKAPGTITNYGVHKCK  
 VWLVSAPSTACSKITNLHGGLTGAMLRPEKKPFVDEKKREFALFSVGPFAFESKC  
 >Potri.011G053600.3  
 GVVYCKSCNYSGVDTFLGAKPVPATVKLQCNNTKYPLEVKATTDKNGYFLAKAPGTITNYGFHKCK  
 VWLVSAPNTACSKITDIHGGLAGAILRPEKKPFVDEKKRGYALFSVGPFAFESKC

## Myrtales

>Eucgr.E02748.1  
 GKVYCDTCRTQFITKVSMDMPDAKVRLECKDREGGSVTYSIEGVTDNTGMYRLPVDGEHEEEICEIVL  
 VKSSQPGCEEVSNDPFLRKTARISLTKNNGMATPVRQANPLGYMKNESLPEC  
 >Eucgr.F00490.1  
 GKVYCDTCRAGFETPASTYIAGAKVKVECKDRTSMKLLYSQEATTDSTGTYLKLVSEHDHQQDLCDAM  
 LLSSPQLNCQKPAAGRDRARVILTRYNGIVSDTRYANNMGFEMDQPLAGC  
 >Eucgr.F03264.1  
 GKVFCDTCRVDFTKVSYGLADSKVRLECHNRTSGALTLSAEAVTDKTGEYRLEVEGDHEEEICEVQ  
 LIESSEPECCSLLGAVHNARVALTNKNGVAQPARFANALAFKKTADLC  
 >Eucgr.G03079.1  
 GMVYCDTCRKYFGTWSLDEAKPVGSAKVSVCCKNYKNRVITYYKTFQTEESGYFYAELKGYEMSNPIL  
 DHPLHACHVKLVSSPLEGCNLLSNINYGMYGAPLRYEDKTLRYKEYEVVYAAGPLAFRPSYC  
 >Eucgr.H04813.1  
 GSVYCDTCRFGFETPASTHIEGAARVECKDSTGTQLDYSIDTVTDSNGKWEVTVEDDHDDQLCSAV  
 LVSSPKAGCQTVDPGRSKATLILTRSNGAISSRHYANSMGCLTDQPLAEC  
 >Eucgr.L01869.2  
 GAMECSDCAQNRNVKLSQAFSGIRVSIECKTAKGKFEHRAVGELDGEGKFQVSLPEEMVEGGKLKEE  
 CYAQLHSAQATPCPAHDGLESSKIVLKSANGKHTFGLSGKLKIASSTC  
 >Eucgr.I01377.2  
 GIGECADCKRNINAKQAFSGIRVSINCLTPKGEYKRRGVGELNEEGKFVLLPPEIFVEGKSKEECYA  
 QLHSAATPCPSYGSPKSSKIVFKPVTHTKRTYGLADKLKFSPTAC  
 >Eucgr.G01761.2  
 GTVICDQCKDGRMSIFDYPIYGIKVMVACTNSDGQVTMSREETTWNFGNYGMRFEFTPDLSSCHAQ  
 VMGGSGQGSMGCSASASPAQPLRLTFQMFNMEFYSDTLLSQPAQPMSC  
 >Eucgr.J01410.2  
 GTVYCNCCTFQGFASKASHFIPGASVAVECKDGSAKLSFHKEAKTDEHGEFKVSLPFSIGKHVRRIEGC  
 SVKLISSEPNCASVPTSSSLHFKMRKNGDHVFSAGFFTFKPLQRPKLC  
 >Eucgr.E03269.3  
 GVVYCKSCEYTLNGAKPIIGAVVKLWCKNTKYPAWATATTDKNGYFFLEAPKTVSNFATHKCKVFLVS  
 SPIPSCSEPSNLNGGSSGAPLKFEKLVLGKPLFTLYSVGPLAEPKC  
 >AYMT\_2111070\_Eucalyptus\_leucoxylon.1  
 GRVVCDVCGDSSIGPEDHVLQGAEVAVLCITKSGEVVNYQAFTNSKGVYKVAETMPESDRWDACLA  
 RPISSFHEHCTQLGGGTAGVKFSYNHPSGYFHTVRPFVYRTVNVPTYC  
 >AYMT\_2010734\_Eucalyptus\_leucoxylon.2  
 GTVFCDTCFKQEFSTRSHFISGAYVSLECGNSSSSLSFRQEARTNRHGKFKVLLPPSMGKRREAEGI  
 EGCTVLIKISGDPGCHAVSLGISSSLRLKAKRHGLQVFSAGLLAFKPLKQPSRC

## Malvales

>Gorai.009G368100.1  
 GRVYCDTCRVEFETKISKPIKGASVKLECRNITNEKIVSHSQDVVTDEAGGYKIEVKGDHEDEICEVSL  
 VKSPRADCSEPTVWRKARVVLTKADGVSGIYRFANNLGYMKKEALPEC  
 >Gorai.009G368200.1  
 GHVYCDTCRVEFETKLSEPIGAVVKLECRNRTNEAITFQSKEIVTDNHGDYHVIVEGDYEESSDCDVAL  
 VRSPRADCSDPTEAWRKSRRVLTTFDGLSGKLRFANNLGFKKDIALPQC  
 >Gorai.009G282200.1  
 GQVYCDHCRAGFETPKTRNMAGAKVKVCSNRKTGDVVYEKEGHTDSTGQYKIAVSEDHLDEICDA  
 VLVKSSQPECAEMSPGRERARVLTNFGISSNTRFANAMGFMANKAEAGC  
 >Gorai.004G272200.1  
 GKIYCDTCRVEFETKLSEPIGAKVKLECRKQGDVTVYSHEAETDANGVYKIPVEGNHEEQICEVSTV  
 SSPRADCNEKMEAFEKAQVELTSDDGLAEPSSRKANNLGFKKVAVPGC

>Gorai.002G061500.1  
GKVYCDTCRVEFETKLSQPINAKVHLECKNRTDERIVYSKDAVSDKLGMYSSIPVEGDHEDELCEVRLIE  
SPRNNCNEMMESWRKARVVLTRRDGVTDLTRQTNNLGFKIKPEDVDTKAC

>Gorai.002G087500.1  
GRVICDVCADSSIGPEDHILEGAEVAVLCITKSGEVVNYQAFTNAKGIYTVAETMPESDRWNTCLARPI  
SSFHDHCNHLGDRSTGIKFTYSRPSGHFHTVRPFVYQPSTAPSYC

>Gorai.002G160400.1  
GKVMCQDCTKSYGEWTHGSQPIKGGKVSVTCKDDRSRIIYYASDESDEEGSFNMAVNKYINGKELQP  
TSCLVRLVSSPHLTCNIPTNFAGGITGVNLPVRPTVLYRDLVQYQLGTFFYTTPRC

>Gorai.005G093100.1  
GYVYCDTCRAGFETPKTRSLADAMVRLVCSDRKSGQVVFKEGYTDKTGKYQIRVSEDHLDQICDAV  
LVKSSQLGCATMSPGRERARVILTNFNGISSTTRYANAMGFMVDEPEAGC

>Gorai.011G291100.1  
GMVYCQSCDNYGSWSLSKAKPIASAKVSVICKNQRGQVSYYKASETDGNGYFFAELQGFEMSHLLL  
DHPLQSCVVKLVESPLEGCNVLSNINYGYSPLRYENKRFYRKDYDVVIYAAGPLAFRPAHC

>Gorai.012G153300.2  
GVGECTDCKENNLDTTQAFSGLRVITIDCKPENGDFHFKTRGSGKLDKQGNFKVSLPQHFLFKDGKLINE  
HCYAQLRTVSSPQPCPSINGLESSKLVFKSTTDQKHQFGLKENLKFSPITC

>Gorai.001G206700.2  
GTVYCDTCFQSDFSRPTHFISGATVAVECKDGKSSRASFRQQVKTNRHGEFKVHLPFVSKHVKKIE  
GCEVKLIKSSPEPYCAVASSATSSSLHLKSRKQGTHVFSAGFFTFKPFKQPTLC

>Gorai.001G206900.2  
GTVYCDICFQQDFSKAHHFISGASVAVECKDGDSRPSFRQVAKTNEQGEFKVRLPFSVTKHVKKVKG  
CSVKLVRSSEPYCAVASSSTSSSLHPKSTKQGTKVFSAGFLSFKPLKLPNLC

>Gorai.002G193700.2  
GAVFCDQCKDGQRSLFDYPLSGMKVTVACADGTGQVTMSREETTNVFGNYVMRFDGTPDLSNCNA  
QVSGSGEGSNDCGATAGPAQKLRLMFRMFMEIYGVDLSLLSEPSQPMSFC

>Gorai.002G193500.2  
GAGECADCAENNLEISQAFSGLRVSIDCKPENGKNFKTRGSGELDKQGNFKVFPEDLVENGELKEE  
CYAQLHSVSAAPCPAHDGLES AKLVLSRSDGKHEFGLKGKLRFSPLTC

>Gorai.010G154300.3  
GVVFCKSCKYAGSDTLLGAKPILGATVKLTCKNTKYKQEATAKTDKNGYFFLQAPKTVTSFGAHKCTV  
SLVSSPMAKCSKPSNLHGGLKGATLRPEKPFTANKLPFILYTVGPFAFEPC

>Gorai.009G168900.3  
GVVYCKSCKYAGVDTLGAKPIPRATVRLTCKDAKNELTVQFKTDKNGYFFLQAPITIYNFDLHNCSVS  
LVSSPLKACSKPSNLGGLKGAPLKPEKPSTSKKLPYVLYSVGPFAFEPTC

>Gorai.005G018000.4  
GKVYCYRCYDSSYPEKSHGKKHLEGATVEVTCKEGEKEITVYGKTKNNGKFAVTVDFDYGKYGAK  
ACIAKLHAPPKDSSCNIPMSVHDGIKGA VLKVKSEDKYEVVLRAPFGYGSKKPYKKC

>Gorai.006G227800.4  
GKVYCYRCYDWSYPAKSHNKKHLKDAVVEVTCKVGEKEITAYGKTKINGKFSITVEGFNYAKYGAEAC  
KAKLHAPPKGSSCNATGLHGNGKGAMLTVKS KDKEYEVVLAEPFAYAPKTPYKEC

>Gorai.013G160500.1  
GRVVCDCADSSIGPEDHVLEGAEVAVLCITKSGEVVNYQAFTNSKGIYTVAETMPESERWDACLAR  
PISSFHDHCNHLGDGSGTGIKFTYNHPSGHFHVIRPFVYRPSTAPTIC

## Brassicales

>AT1G78040.1  
GSTYCDICKFGFETPESSYFIPGATVKLSCKDRKTMEEVYTDKAVSDKEGKYKFIVHDDHRDQMCDVL  
LVKSSDKTCSKISVGREKSRVILNHYSGLASQIRHANNMGEFEKEVSDVFC

>AT1G29140.1  
GSVYCDTCRVQFITRISKFLEGAKVKLECKGRENQVTTLTKEAVTDNAGNYQMEVMGDHEEEVCEIVL  
LQSPDPECGDVNNQEFRLNAARISLTANDGIVSNETRRTINPLGFMKTPLAEC

>AT3G09925.1  
GKVMCQDCSLNYDEWINGSEPIKGAVVSITCMDERRRVSYGSDLTDERGQFDLMVNKVL SHGKVL  
KPQLCNVRLVSSPDLSNIPTNFGNGQTGVKLVRPFTVFRDLVKYVVGPFYTTPMC

>AT4G08685.1  
GRVYCDTCLAGFETPASTYISGAVVRLECKDRRTMELTYSHEARTDSTGSYKILVNEDHDEQFCDAM  
LVRSSQLRCSNVSPGHDRARVTLTRFNGLIASDDRFANNMGFLRDAAMP GC

>AT5G45880.1



GSVYCDTCRVQFVTRL SKFLEGAKVKLECRSRTNGTITLTKEAVTDKTGSYKMEVTGDHEEEVCELVL  
VQSPDSGCSDVSTEAYLRNAAKISLTANDGIVSHETRIVNPLGFMVQTPLADC  
>AT5G10130.1  
GSVYCDTCRFGFETIATQYIRGARVRIVCKDRVTLKSELVGVAVTGPDKYKVAVRGDRQDQQCLAE  
LVHSPLSRCQEADPGRSTATVILTRSNGAASTRHYANAMGFFRDEPLRGC  
>AT5G54855.1  
GRVVCDVCDSSIGPEDHVLEGAEVAVLCITKSGEVVNYQAFTNSKGVYTV AETMPESERWDACLAR  
PISSFHTPCNRLHQTN TGIFTYNRPSGFFHAVKPFVYRPQYAPSYC  
>AT5G15780.2  
GTVYCDTCFNGAFSKSPNHLISGALVAECIDENSKPSFRQEVKTDKRGEFKVKLPFSVSKHVKKIKR  
CSVKLLSSSQPYCSIAS SATSSSLKRLKSNHHGENTRVFSAGFFTRPENQPEIC  
>AT2G16630.2  
GSVFCDQCKDGERSLDFPVSIGIKISVTCADENGQVYMSREETTNWLGGYVMRFDGTPDLSN CYAQ  
VSDNGVQQDPSSCSIASGPAQKLKLMFSFFGIETFAADALLAQPVQPSSFC  
>AT1G28290.3  
GTVYCKSCKYAAFNTLLGAKPIEGATVKLVCKSKKNITAETTTDKNGYFLLLAPKTVTNFGFRGCRVYL  
VKSKDYKCSKVSKLFGGDVGAELKPEKKLGKSTVVVNKL VYGLFNVGPFAFNPSC  
>AT2G33790.3  
GVVYCKACKYAGVNNVQGAKPVKDAVVRLVCKNKKNSISETKTDKNGYFMLLAPKTVTN YDIKGCRA  
FLVKSPDTKCSKVSSLHDGGKGSVLKPVLPKPGFSSTIMRWFKYSVYNVGPFAFEPTC  
>AT2G34700.3  
GMVYCKSCKYSGVDTLLEASPLQGATVKLACNNTKRGVTMETKTDKNGYFFMLAPKKLT TYAFHTCR  
AWPTNPGPTTATMTCTVPSKLNNGITGAMLKPSKTINIGEHDYVLFSVGPFAFEPAC  
>AT5G05500.3  
GMVYCCQSCDKFGSWSLAGAEAIAGAKISIICKNHRQQVSFYKVFRTDSYGHFYGELKGFKMTPHFLD  
HPLHSCRAKLVSSPREDCNLFSNINNALDGAPLRYEEKRLKWTNYEAVIYAAGPLAFRPDHC  
>AT4G18596.1  
GSVYCDTCRVQFVTRL SKFLEGAKVKLECRSRTNGTVTLTKEAVTDKTGSYRMEVTGDHEEEVCELV  
LVESPDSGCSDVSKEAYLRNAAKISLTANDGIVSHETRIVNPLGFMVQTPSAEC

>Plantago\_lanceolata\_CAC41635  
GEVYCNVCHSRNLINELSERMAGAQQLDCKDDSKKVIYSIGGETGQDGVYRLPVVGYHEDCEIKLV  
KSGRPDCSEIPKLAKGTIQTSKVDLSKNTTITEKTRHVKPLSFRAKTDAPGC
