# Supplementary material for: The Cell Wall PAC (Proline-Rich, Arabinogalactan Proteins, Conserved Cysteines) Domain-Proteins Are Conserved in the Green Lineage
Source: MDPI journal article supplement (doi:10.3390/ijms21072488), 2020-04-03
Supplement: s1 [file s1]

**Supplementary file 5.** Amino acid sequences of putative PAC domains with only five Cys residues, more than six Cys residues, or no Gly upstream Cys1.

In the protein name, “.nd” means that the type of protein could not be determined because the amino acid sequence of the protein is not complete; “.1”, “.2”, “.3” or “.4” refers to the type of protein (see Figure 2).

Originally, the accession numbers originating from the onekp database were of the following type: #onekp:JVSZ\_scaffold\_2013751 Equisetum\_hymale. They have been simplified for more convenience, as follows: >JVSZ\_2013751\_Equisetum\_hymale.

#### Five Cys residues

##### >LOC\_Os07g40100.1

GEVY**C**DT**C**RAGFVTNVTTAIQAARVRLE**C**RHYMSASGSVERSAEGTTDATGHYRMELVEV  
DNRGAELV**C**AVALLSSPVTE**C**HEMEVGRDRAPVTLVQDVGLATMVRRANPLGFLQTMLAR  
YADTDTRYVDTKMWHL

##### >Aco007813.2

GSVT**C**LD**C**TPHHNLSGVVAVK**C**AHMKLLPAVTNNEGYPFIVSIPATTPKSSPTLTPQ**C**FAR  
LLGGREQLYAFERSMAASIVAVGRGSNGYDLASPLAYLSK**C**

#### Seven Cys residues

##### >JVSZ\_2013751\_Equisetum\_hymale.2 (incomplete sequence)

GSVY**C**DQ**C**LQGHRTLWSTPLRGASVALE**C**MNSTAAGQKKAETDLLGMYAIRLEGSLDMQG  
**C**IARLVSSPKGSSG**C**NLAGVASRPLKLTWKLFVSYTSDAL**C**

##### >IZGN\_2005470\_Dacrydium\_balansae.2

GSVF**C**DK**C**SQHSLHLPPTYFIPDATVAVE**C**SLNRKARASIRVEGRTDQSGEFRIELPSSIYNT  
YSG**C**SVEVINSPDGL**C**NVPSVNKLAFTMNGKHDSVY**C**AGILSYRPQVLPS**C**

##### >IZGN\_2005471\_Dacrydium\_balansae.2

GSVF**C**DT**C**SHHSLHSPTTYFITDATVAVE**C**SLNRKARASIRVEGRTDQSGEFRIELPSSIYN  
TYSG**C**SVEVINSPDGL**C**NVPSVNKLAFTMNGKHDSVY**C**AGILSYRPQVLPS**C**

##### >Spipo4G0058500.2

GTVF**C**DI**C**ANNSFSKHSYFLRGAKVRVE**C**SFKAAAAAREEITISVERTTDRFGVYRVDVPPV  
DDFQ**C**REGREIESF**C**RANLVRSSSSM**C**NVPGLSISSEHVG**C**

##### >Spipo1G0064500.2

GTVF**C**DQ**C**LDGQRDLFDYPLYGARVAVV**C**TGGGDGQMALYGEATTNWFGVY**C**VQFDGG  
PDLSS**C**SAQVVSQTQW**C**GGAAGPPGGLHLLFGLFGTAMYTADALLALPSKPAS**C**

##### >P.equestris\_XP\_020598742.1

GRVF**C**DT**C**RAGFETPATTYIEGAKVKVE**C**KAGDKI**C**SYDGVTDNSGTFNILVEDEHEHEI**C**E  
AMLVSSPDTE**C**KTEVPGREKSRIVLSHNNGISSDTRFANALGFQKDTPLAF**C**

##### >GSMUA\_Achr1T21560.1

GRVF**C**DT**C**RAGFETPVSTYTKGAKVRIE**C**RSKATGAKT**C**NFEGTTDHTGTYNILVADEHEH  
EI**C**ESMLVSSPESR**C**KTPLQGRERARVFLSHNNGIASDTRYANSLGFQTDTPLSV**C**

##### >GSMUA\_Achr11T13000.1

GRVF**C**DT**C**RAGFETPASTYIRGAKVSVE**C**RSRITGAKT**C**SFDGTTDHTGTYNILIADHDDH  
EI**C**ESVLVSSPESG**C**KTVLRGRERARVFLSRNNGIASDTRFANSLGFTKDTPLS**C**

##### >GSMUA\_AchrUnT14160.1

GRVF**C**DT**C**RAGFETPVSTYIQGATVRVE**C**RSEFTGAKT**C**SFEGTTDHTGTYNILVEGEHDD  
HEI**C**ESLLVSSPESG**C**KTALQGRERAPVFLSHNNGIASDTRFANSLGFLKDTSLPV**C**

>GSMUA\_Achr8T21210.1

GMVY**C**QK**C**KYVGSWNLDGARPLPSAKVSII**C**KDHHKRVIFYDSAETDRNGYFYKLLDGAHL  
RSATFDPVTA**C**TARLLASPDAS**C**NRLTNVNYGIQGAKLRDESKTNSGEH**C**ETELYAAGPLAF  
KPVH**C**

>Oropetium\_21061A.1

GRVW**C**DT**C**RAGFETPASTYIAGAKVRVD**C**KSSTTGEKT**C**SFEGHTDRTGTYNILVADEHEH  
EL**C**ESTLVSSPDT**C**AKAVAGRERAPVFLTNNNGVASNVRLMANALGFKKDVALPE**C**

>Oropetium\_08744A.1

GRVY**C**DT**C**RAGFETNVTEYMKGAKVRLE**C**RHFGTGAVERAVDGVTDETGTYRIELEGNHV  
EDI**C**EVTLVQSPRAD**C**AEVEQHRDRARVVLTTDGGI**C**DALRLANPLGYLKDAPLPV**C**

>Oropetium\_24235A.2

GSVY**C**DA**C**SNNTFSKHSFFLKGAKVLIQ**C**NFKVNSTASEELSLAAERTTDQNGVYKLDVPTV  
AGFA**C**REGHELRS**C**RATLVRSSSA**C**CNVPGLTRGSTQHVALRSRATNA**C**

>Oropetium\_26560A.2

GTVF**C**DA**C**SSSSFSNHSYFLPGVKVRLD**C**CMVKVNSNSREEIKITAEKVTNSYGAYRLDIPAI  
GFE**C**AATAAEAL**C**CRAAVLDNPSEL**C**CNVPVTTTTVRHVSFPTPNAASG**C**

>Bradi2g03930.1

GLIL**C**QP**C**AHRNSQ**C**LDAATPIPNAQVTVT**C**RDPKNRVKTSRVAKADAQGYFLAEIGVADGK  
QEFYEGDPSKA**C**FVRLSSPDKG**C**NDLTNVRYGIEGAELRDEGKRWWADGVENVVYAAGP  
LAFRPR**C**

>Bradi2g31950.1

GRVY**C**DT**C**RAGFETNASHSIPGAVVQME**C**RHFETNELHHKAEATTTDAQGWWYKMEVGEDH  
QEEI**C**EVALLRSPEKD**C**AEIEKSRDR**C**RVPLTRNNGIKQSGVRYANPIAFFRKEPLAN**C**

>Bradi3g00370.2

GMVF**C**DQ**C**KDGARGLFDYPLYGARVAIQ**C**GGGETPLTVRE**C**CNTNWFGGFSVRMEGSPDM  
NR**C**TARLIQGT**C**PH**C**PGGGSTAAPQQRDLTAFRMLGLALYTVQPLL**C**SHPDHPMD**C**

>Bradi2g48680.3

GVIY**C**KP**C**RSRRYSRDMASPLQGATAQLV**C**YGREVVNVTGTVTDERGYFLVMFYDLGNF  
HPRN**C**KL<sub>Y</sub>LGTSPTTL**C**CNPVYPPN**C**KWIGLSLVRETRTTPPEGLQGIY**C**CPTSVLFYGP**C**TAGQ  
K**C**

>LOC\_Os04g32680.1

GRVY**C**DT**C**RAGFETNVTEYIKGAKVRLE**C**KHFGTDKVERAIDGVTDETGTYKIELKDSHEED  
I**C**EVVLVHSPLAN**C**SEIEAERDRARVLLTRNVGI**C**CNLRLANPLGYLKDIPL**C**

>LOC\_Os10g13914.1

GQVA**C**EL**C**LCPGSDLLTFELPGAKVEVA**C**ETEGPNTQANSVFTATDEFGNFTFHLPSRLHA  
TPSLEN**C**AVVKVLQ**C**LPDS**C**AGLRHRPAASYRIRPSSSLSSSADGFRAYTAGVIRLQHGGTP  
SGE**C**

>LOC\_Os10g39890.1

GSVL**C**QD**C**TKSWNAYAYNAKPIPGSMVGIT**C**LDKETGRTVYHGTDKTDDKGMFNIEVPYTV  
GSAHLHPSA**C**LVRLASSGDHG**C**AVFTNFNGGKTGERP**C**CRPSHVYPGRVTYSAGPFYFTLS  
Q**C**

>LOC\_Os10g22590.1

GRVW**C**DT**C**LAGFETPASTYIAGAKVKVE**C**RSKSTGAKT**C**SFEGQTDHTGTYNIPVNDEHEH  
EL**C**ESVLVSSPDAK**C**GKIVAGRERAPVFLTNNNGVTSNVRLANALGFQKDAPLA**C**

>LOC\_Os09g32988.2

GSVY**C**DA**C**SNNTFSKHSFFLKGARVLIQ**C**SFKVNSTMAEELSLEAERTTDQNGVYKLDVPA  
AGGFD**C**REGHDLRS**C**RATLVRSSSA**C**CNVPGLRGSTQHIALRSRATNA**C**

>LOC\_Os02g01190.2

GMVF**C**DQ**C**KDGARGLFDYPLYGARVAIE**C**GGGESPVTVRE**C**CNTNWFGGFSVRMEGTPEM  
NR**C**TARVVQATGH**C**GAAIPTAPRDLTAFRMLGLALYTVPPLLSQPLRPMDF**C**

>LOC\_Os01g52660.3

GVVYCKTCKSRGYSSDMDASPLPGATAQLVCYGKKVVNVTGTVTDANGYFLVMFYDLRNF  
NPRTCKVFLGSSPTSLCDKPVYPPNWKWIGLSLLKETRTVPPVGLQAIYCPTSVLFYGPANAG  
QC

>Sobic\_009G082900.1

GRIYCDNCRAGFETNISHAIQGATVEMECRHFESQQIHDKAQATTDAGGWYKMEIAGDHQD  
EICDVRLLKSPEADCAEIEVNRDRCRVPLTGNDGIKQSGVRYANPIAFFRKDPLPNC

>Sobic\_003G059000.3

GVVLQCSCEKKGSQSLDGATPLPRANVTVTCRDRKNVMAYRQRAADDNGYFHAIEFGVQ  
RADYYLDKDPLEACFVRLLSSPDAKCNVVTDINGGMLGAPVRGEGKQWTDHRGFKNVVYA  
AGPLAFTPEKC

>Zm00008a036634.1

GTVFCDACTSSFSKNSYFLPGVRVRLDCMIKVNSNSKEEIKITAEKVTNSDGAYQLDIPAD  
GFQCAAPGATAGESFCRAAVLDNPSALCGVPAVTTTVGHISLPSQDPSAC

>Zm00008a004591.1

GQLTCELCLRPGSPLLALEMPGAKVAVTCDCESHQHPSDEPDSHALLAATTDESGNFTIDL  
ARLHATPDLEKCAVKVLRPLAGSSSCRLRHRAADAYRLRLASAEDGARAYTAGVIRLRDG  
DTPSDRC

>Zm00008a025512.1

GRVYCDNCRAGFETNVSHAIEGATVEMECRHFESQEVHDKAEATTDAGGWYRMEISGDH  
QDEICEVLLLSPEADCAEIERTRDRCRVPLTRNDGIRQSGIRYANPIAFFRKEPLSNC

>Aco000299.1

GRVVCDVCDADAAIGPEDHVLEDCLMLASENIFEYSPLRTGAEVAVLCITKSGEVLNYQAFTD  
SKGVYTVAETMPESDRWESCLARPISSFHDRCAKRGDSHSGVKFTYNRPSGHSHTVKPFL  
YKPTSPVYC

>Aco003633.2

GTVFCDACTSDNTFSKHCYFLQGKVRVDCMFKVNSTSKEEISITVDRVTDRFGVYKLDIPPV  
DGFECDRVGREIESFCASLLESPSTLCNVPELSSSIEHVSLKSPGGTMC

>Aco006667.2

GSVYCDPCSNNTFSKHSFFLKGARVQIQCRFRVNSTSREEILIEAERTTDDKFGIYKLDIPPV  
GFECREGREIRSACRANLISSSSSSCNVPGLQGSTQHLAIKPKQANIC

>Aqcoe6G061600.1

GKVFCDTCRLGFETPATTYITGAKVRVVCKTRDSLQPVFSCDAFTDSTGSYSVTVAYDHED  
QICESVLISSPQKNCAAIMPGRERANVILTNNNGIISYNRFANNLGFVRDEPLAAC

>Aqcoe5G346000.2

GFVYCDICSNNTFTRHSYFLPGVKVHINCKFNAISATTTEQISFSVNRTTDDKYGIYKMEIPSVE  
GIECAEGVSVQSSCEARLITSSSSSCNVPGLTSTSDQSAFKLKQDNVC

>Aqcoe1G261600.3

GVVYCKSCKYSAFDTLGAKPLSDAVVKLECNNTKKPITTYGKTDKNGYFFFQAPKKVSTHG  
FHKCRAFLVSSPSSFSCTKPTDMNSGWKKGALLIAANQTFPTPIALFSVGPFCAFPTKC

>Aqcoe3G160500.1

GTVYCDMCCSNNTFSRHSFYLSGVDVHIDCKFKASIPTTSELISFSVNRTTDDKYGVYKLDIPSV  
GVNCAEGHATELS CRAITIGSSSSL CNIPGLSVASEQVKIKSRHNHC

>Lsat\_1\_v5\_gn\_5\_42161.1

GRVYCDTCRCGFETSATTYLAGAKVRVECRDRNSMNLRYTMDAVTDATGTYHIEVATDHG  
DQKCECTLVGSPDPGCGKPNIGRHRATVILTSNNGMNYGARYANAMGFLKDTALAGC

>Lsat\_1\_v5\_gn\_6\_28201.1

GKVLQCDCTEGWNEWVSGQKPIEGCTVSVTCMDNRKRIIYYGRDQTDKAGEFVVTINKYIH  
GKQVKPESCFTRLVSSPDV CNIPTDFAGGKSGVKLGPRTMVYRDTIKHVLGPFYTTPMC

>Potri.006G119100.1

GKVMQCDCTKGYNDWINGDRPIKSGSKVCLTCTDDRGRVIHYDSDVTDERGEFDMIVSKYIN  
GKQLKEKKCSVRLVSSPDPS CNILTDFAAGKSGVKLKRPTSVYRDTVKYMLTPFYFTSPMC

>Eucgr.K02418.1

GRVL**C**QD**C**TKGYDEWVKGGSPIKGAKVSLT**C**MDQRYRVIFYGSDDTDGTGQFNMIVDKYIN  
GKQLNEKL**C**LVRLVSSPDPT**C**NVATDFAGG**C**RGVKLSRPRSVYREVIKYAVGPLYTSPM**C**  
>Eucgr.D00613.3  
GVVY**C**KS**C**KYSGVETLLGATPVLRS**C**RFDDEVSSFFAGAVVKLE**C**NNTKYRPTVQTAKTDKN  
GYFFLKAPKTITTYAFHK**C**MASLASSPVPS**C**QKPSALHGGTVGAVLRPEKPVMIDKLPTYTF  
TVGPFAFEPQ**C**  
>AYMT\_2115347\_Eucalyptus\_leucoxydon.nd  
GMVY**C**DI**C**FNNTFSRHSYFLPGAQEVKID**C**KFEAVSPKTTEQISFSVKRTTNRYGVYKLEIPAV  
DGIE**C**AKDSAIVSF**C**ASLMGISSDS**C**NPVPGYRTTTDQIAFKSKQANL**C**  
>Gorai.010G248800.1  
GTVL**C**EA**C**HQRRRRDPQPELRSWPISGALVSVK**C**ETP**C**KTSGTTPATTDEYGDFMIDLPS  
HLHGVAIDLQKI**C**TVKVIGIPKESM**C**RPAFVKKHEHLRLSSVGNIGRTYTAGRIRFQDIMSKPS  
KS**C**

#### Eight Cys residues

>Zosma169g00070.2  
GTVF**C**DI**C**SKNTFTKHSYFLPGTKVEVQ**C**NFKVINSTSKEEISITVDRKTDRIYGIYRVDVPPV  
DGFE**C**RQGREIQSF**C**RARLIQSSSSL**C**NPVGLSTSVEHLAMKFSQSNL**C**IYNLNALNYKPSK  
KNLAL**C**  
>P.equestris\_XP\_020589188.2  
GTVF**C**DA**C**SENTFSKHSYFLQGATVQIS**C**KFSTETTSCEEISINTKRTTDKFGIYKLEIPPVDG  
FQ**C**SEGRALQSF**C**KASLVQSPSPL**C**NIPSLSSSKQHAFKAGGFNS**C**IYDLNALSYPKAQRD  
SSF**C**  
>GSMUA\_Achr9T29260.2  
GTVF**C**DA**C**ANNNFQHSYFLEGVKVRVQ**C**VLRVNETSAGEMRVAVDRTTDRFGVYKLDIP  
PVDGFE**C**REGRGVDSF**C**ASLAESPSSL**C**DVPGLSSSTEHVAVRGGEGL**C**LYNLNALNY  
RPSKKDADL**C**  
>Bradi3g32620.1  
GTVL**C**QD**C**TKNWNAYAYNAKPIPGSGVAVT**C**LEKKGKVAFYGKDETNEGVFSVEVPYEP  
GSGAG**C**RLLDPSE**C**LVRLVASEDKG**C**SVLTNFNGGRSGQRPFPSKV**C**PTEVVYNVGPYYA  
TLPQ**C**  
>Aco011770.1  
GKVL**C**QD**C**SKGWNQWAHGATPIIGSKVGVT**C**MGPQARVLLHKSDA**C**DRRGEFDVVVDKY  
VNGVEVNPEE**C**TVRLVSSG**C**QNC**C**TVMTNFNGGKDGVRSLRPSTVYPGRIAYKVGPFYFTT  
PK**C**  
>Lsat\_1\_v5\_gn\_0\_3380.1  
GVVY**C**DA**C**SNNSFSTHSYFLPGAQEVRI**C**KFKAASPRTEQISFSVNRTTNKHGVYKLEIPS  
VDGIN**C**AKEEVQVLNT**C**ASLIRSTSPA**C**NPVAFITTSNQFSVKSKQANL**C**IYSLYALSFRPS  
KKDLA**C**  
>Lsat\_1\_v5\_gn\_4\_186081.1  
GMVY**C**DV**C**SNNSFNNNHSYFLSGAEVRID**C**KFNAVSPRTAEQISVSVNKTNNRYGVYRLDI  
PSVDGIY**C**ASESAVMNT**C**ASLIASSSPQ**C**NPVPGFITTSDEFSLKSQHANL**C**IYSMFALSFRP  
FKKDLT**C**  
>Lsat\_1\_v5\_gn\_4\_2141.2  
GSVF**C**DV**C**YSNLFTRYSYFLPGADVHVQ**C**KFQGNAPSTKEQISFSVNRTTNRYGVYRLDIP  
SVEGVD**C**VEGPAIQSL**C**EA**C**TLIKSSVPG**C**NPVPGVSTTTKEITVSKSTNV**C**VYSVSALSYP  
QINSTL**C**  
>GSVIVT01033047001.1  
GIVY**C**DI**C**SNNTFSRNSYFLPGVEVNIE**C**KFQAISPRTEQISFSVTRTTDKFGVYKLEIPSVE  
GIE**C**ASDSAIESS**C**QASLMWSSSSS**C**NPVPGHKTTTDEIAIKSKQANV**C**IYSLNALNYPSE  
RDTAL**C**

>AT3G26960.1

GFVYCDVCSKNSFSKHSYFMSGVEVRIVCRFKAASSTTTETITFSANRTTNEFGLYKVAISSL  
DCADVDSLASSCQASLIGRKNFSDSSCNIPGYRTTTDQVLFKSQQSNSCVYGFNALNFRPF  
KRDALC

### Nine Cys residues

>GSMUA\_Achr9T01210.1

GTVFCDAANNVFSEHSYFLAGVRVRVQCMRLRVTNSTSREEMSITVDRTTDKFGVYKLDIP  
PVEGFECREGVVMDSCCRASLLGSPSSLCDVPGLNSSTGHVAVRGGEKRCLYNLNALNY  
RPSKKDANLC

### No Gly upstream Cys1

>AmTr\_v1.0\_019.68.1

DQISCCLDKTKHQAHGVLVIKCDSEKPILAVTDRTGSFKAIEITTSKTSAPLEDTCYASLLGPR  
NKLCSFKNNQASKFVKSAKYHKDPSSSYALFTPLSFSSSDC

>Gorai.002G165500.1.

TLLDCYLCPKSFKGLQNVFYSSARARERERELLYPGACGGGGWGWISQGIASYGTGHGTRE  
TCALHTARLSCDTLVDFWSALGEETRESLLRMKEEDFIERLIYRC
