# Supplementary material for: The Cell Wall PAC (Proline-Rich, Arabinogalactan Proteins, Conserved Cysteines) Domain-Proteins Are Conserved in the Green Lineage
Source: MDPI journal article supplement (doi:10.3390/ijms21072488), 2020-04-03

**Supplementary file 12.** Solvent accessibility and secondary structure for each residue and alignment of this information with the conserved sequence profiles of PAC domains for each clade.

The conserved motifs are described in Figures 7 and 8.

## Clade A

46/49 sequences  
4.7 e-809

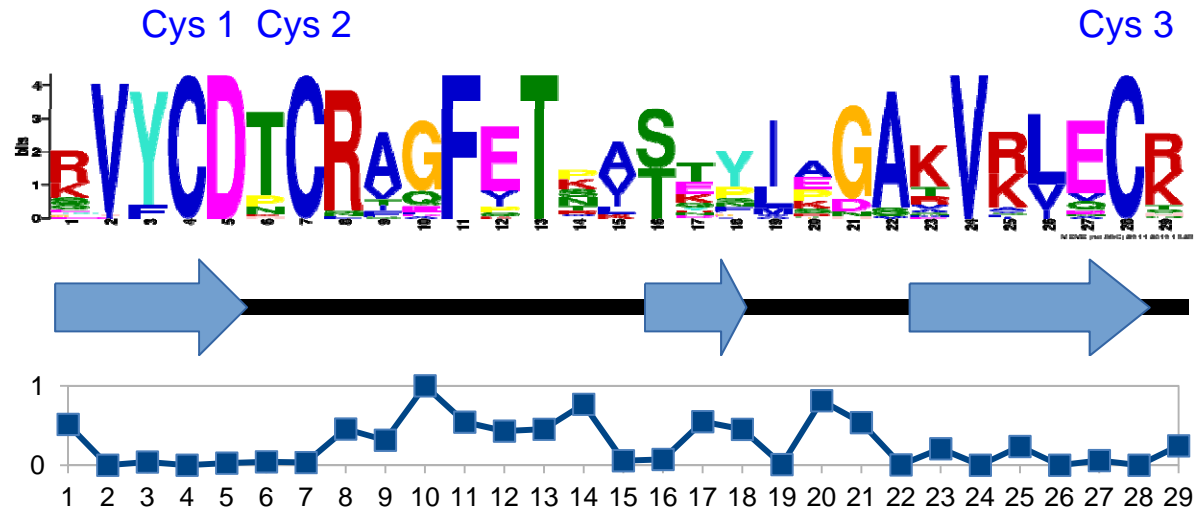

## Clade B

12/12 sequences  
7.8 e-176

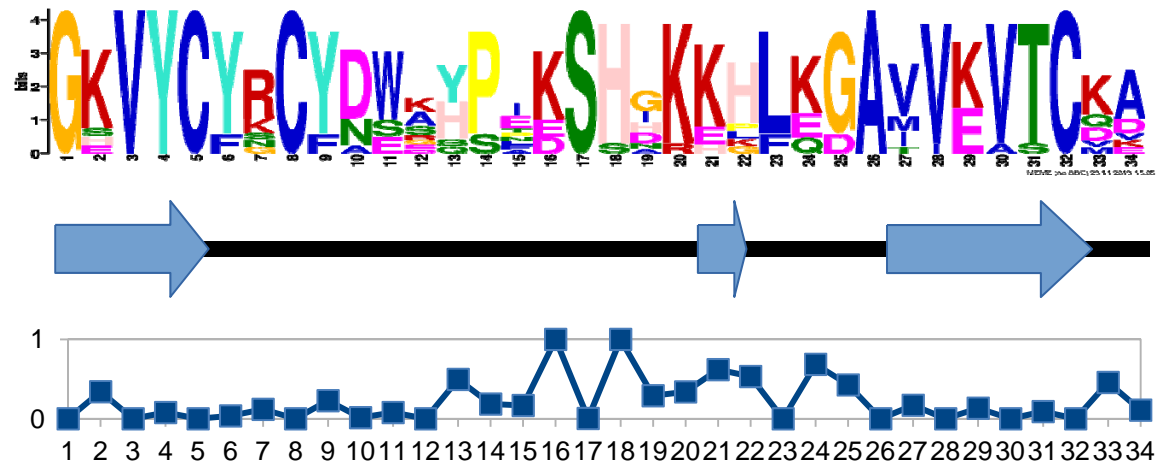

Clade C (highly conserved PAC domains)

14/14 sequences  
4.5 e-1085

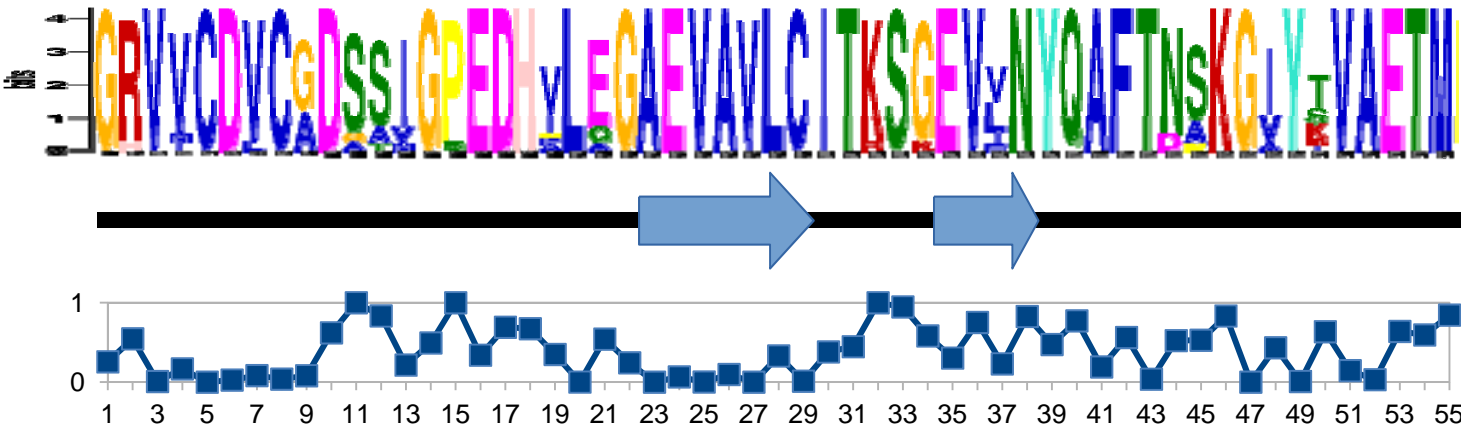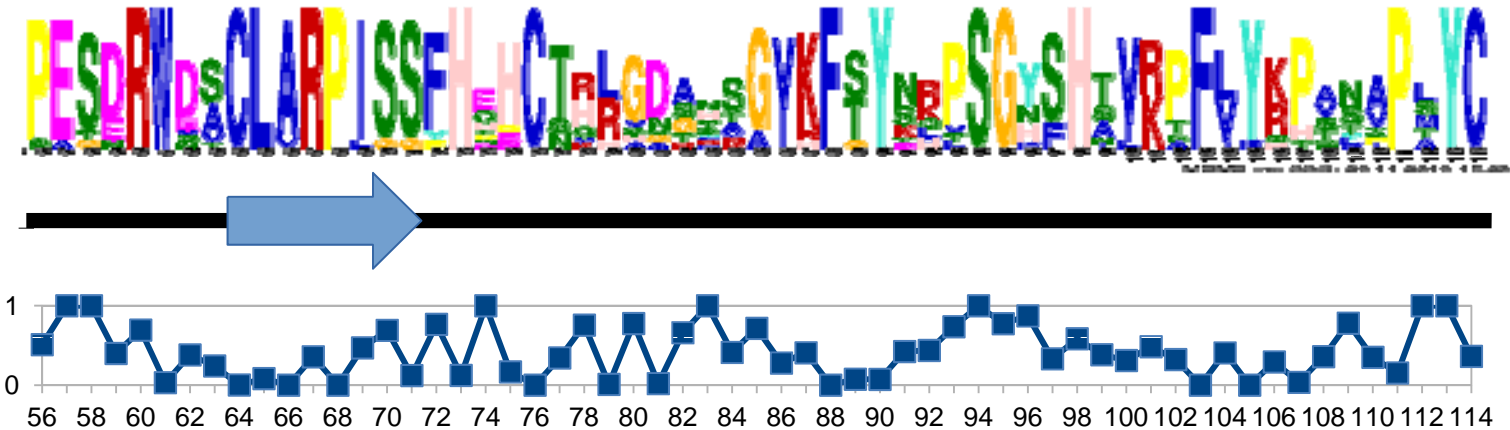

## Clade D

11/11 sequences  
5.2 e-090

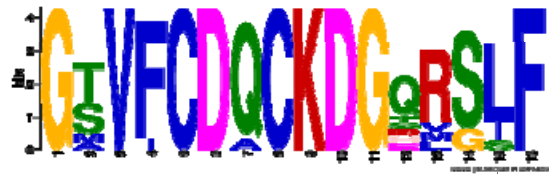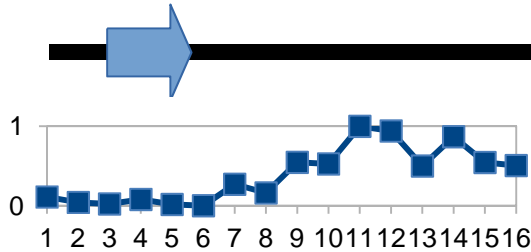

## Clade E

19/19 sequences  
6.0 e-112

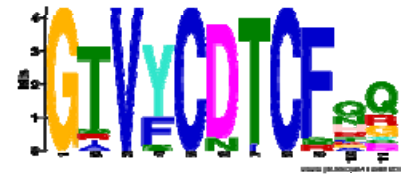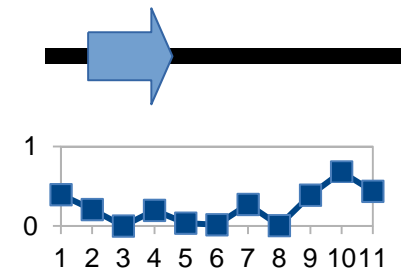

## Clade G

23/24 sequences  
1.6 e-355

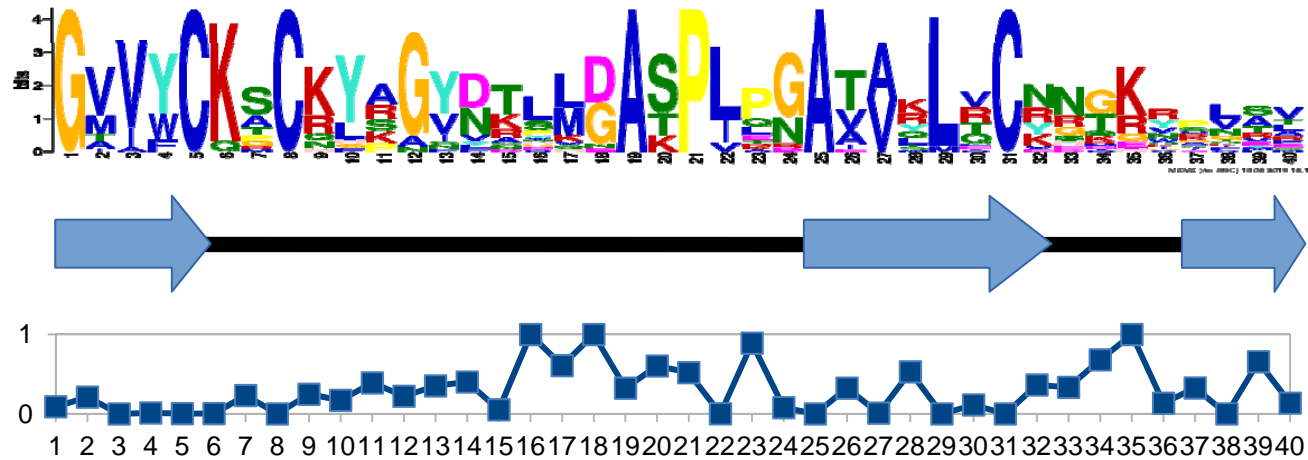

## Clade H

14/16 sequences  
4.7 e-223

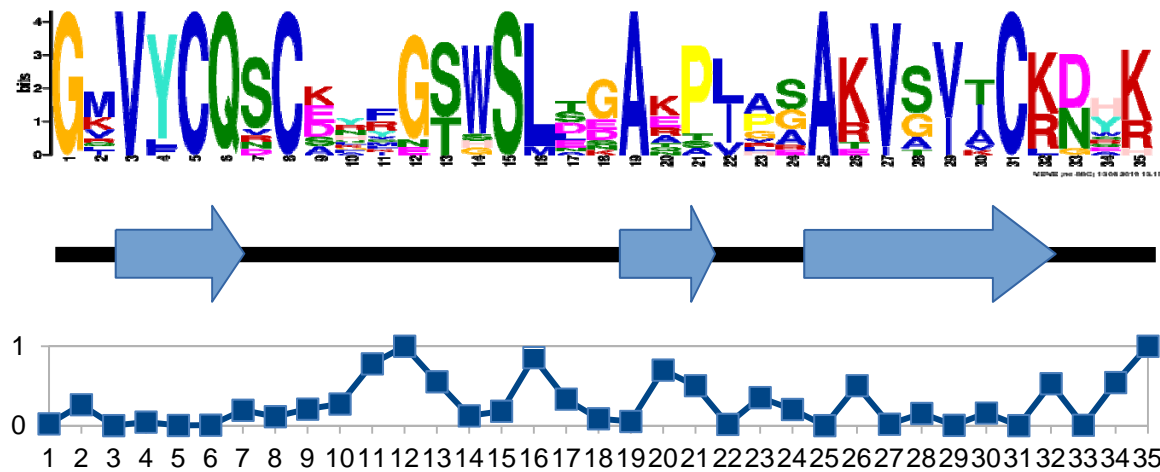

Clade I

8/8 sequences

3.8 e-124

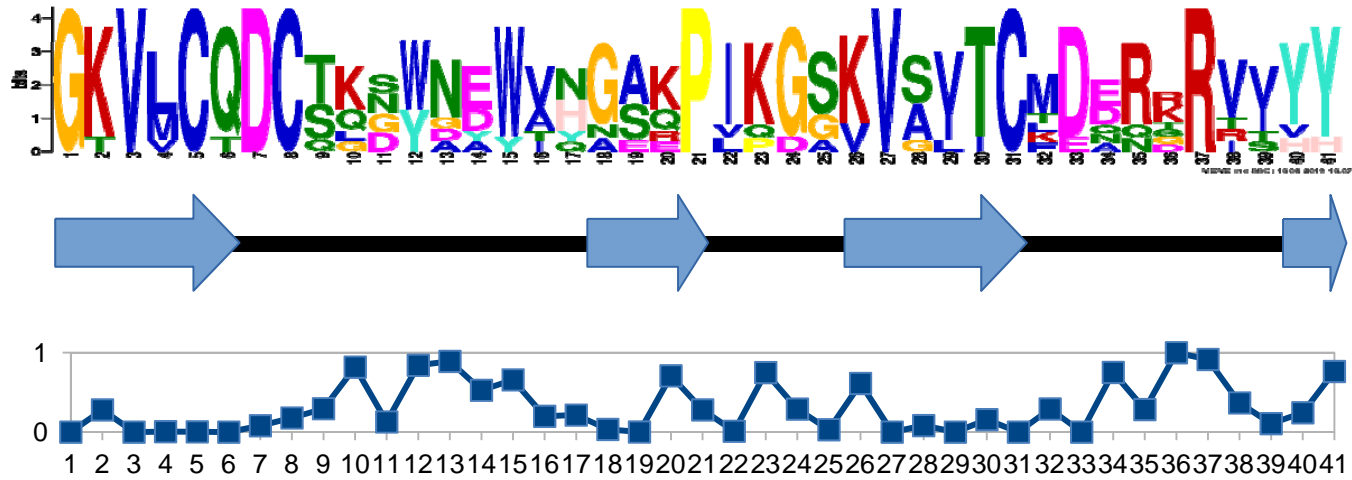

Supplement: s1 [file s1]
