# Supplementary material for: The Cell Wall PAC (Proline-Rich, Arabinogalactan Proteins, Conserved Cysteines) Domain-Proteins Are Conserved in the Green Lineage
Source: MDPI journal article supplement (doi:10.3390/ijms21072488), 2020-04-03
Supplement: s1 [file s1]

**Supplementary file 7.** Amino acid sequences of the PAC and W-W domains of type 2-PDPs including a C-terminal W-W domain

Forty proteins are listed. Only those with complete W-W domain have been retained.

In the protein name, “.nd” means that the type of protein could not be determined because the amino acid sequence of the protein is not complete; “.1”, “.2”, “.3” or “.4” refers to the type of protein (see Figure 2).

Originally, the accession numbers originating from the onekp database were of the following type: #onekp:RTMU\_scaffold\_2181156 Calypogeia\_fissa. They have been simplified for more convenience, as follows: RTMU\_2181156\_Calypogeia\_fissa.

**Amino acid sequences of PAC domains**

>Mapoly0014s0128.2

GNVFCDQCMKNTVFPFALPMLGAKVSVECKAADGSMMAAEATTDFFLGGFVASFKGMADLEGCKAY  
MKSSPDSSCSIAGYEGGGELKLRSKFFFTSFYGVPEPMFFKPAAPKSFC

>RTMU\_2181156\_Calypogeia\_fissa.2

GSVFCDQCLTHEVFPFSYPLKDARVSVQCYDSSGVHVVASATATTDFFGGYIATFKGVSDLGGCKAF  
VSSSPDSSCNLVDGGGKTLKSLKFLWDAFYIVDPLFYKPAHPKDFC

>ILBQ\_2004952\_Conocephalum\_conicum.2

GNVFCDQCMKNEIFPFALPMHGAKVSVECMGADGRMAASAEATTDIFGGFWVSFKNAENMDGCRV  
YMKSSPDSSCSMVGDQSGRAVQLKTKLFFSSFYAVEPMFFKPPAPKSFC

>CHJJ\_2136182\_Lejeuneaceae\_sp.2

GSVFCDQCLKQAVFPFGLPLKGAKVTQCYDASGKIVASGGATTDFFIGGYAVTFKGASDLTGCKAFAT  
SSPDSSCVLTSSGGQAVALKTKFIHNAFYVAEPLFFRPPQPKNFC

>TXVB\_2174716\_Lunularia\_cruciata.2

GNVFCDQCMKNAVFPYARPMGAKVSVQCYGADGSM LASADASTDFFLGGFLASFVKGVSDLEGCKVF  
MKGSPDSSCNFADQSGQGVKLRTKFFSSFYGVPEPMFFKPPTPMGFC

>YFGP\_2104693\_Pallavicinia\_lyellii.2

GSVFCDQCLKHEVFPFGLPLNGAKVSIQCYGASGANVMSSEATTDFFLGGYVATIKGVSDLGGCKAV  
VTASPESSCNLVDGGAQALVLTKFFFNAFYVVDPLFYMPAKPKDFC

>HPXA\_2020358\_Ptilidium\_pulcherrimum.2

GGVYCDQCLKQEIFPFGLPMNDKITVECYDGTGVNVVASATATTNFLGIYETSFKGVSDDLGGCKAFV  
TSSSQSSCSLAEGNGQTLDLTKFFNNAFYSDALFYKPAQPKGFC

>WJLO\_2035800\_Riccia\_berychiana.2

GNVFCDQCMKNTVFPFALPLHGAKVSVQCAGADGKMMAAADANTDIFGGFLVTFKGVEDMGGCRV  
YMKSSPDSSCNIVGNQGLAVQLKTKLFFTSFYGVPEPMFFKPPAPKSFC

>IRBN\_2161692\_Scapania\_nemorosa.2

GSVFCDQCLKQEVFPFGRPLKGATVSVQCYDGAGVNVVASATATTDFFGGFIATFKGVSDLGGCKAV  
VSSSPDSSCSVSDGGGQTLALKSKFLNHAFFYVDPLFYAPAKPDDFC

>HERT\_2003915\_Sphaerocarpos\_texasus.2

GNVFCDQCMKNAVFPYALPMLGAKVSVQCYGAGGSMVASADASTDFFGGFVATFKGVSAALDGCKV  
VMKGSPDSSCSINADSGGKALELTKFFFSSFYGVKGPMPFYKPSAPKTFC

>Pp3c1\_27500V3.2

GKVFCDRCIQNKVFPFAHPMSKAKVSVQCKDWSGRVVGARTSTNFLGDFIVQFKGKKDLGCSVYL  
DGSSDRSCNIIGGRRRAISLKSFLFQAFYVADPLFYKPARPMGFC

>Pp3c14\_8250V3.2

GKVFCDQCIQNKVFPYAHPMKAKVKVECKDASGNVVDYADASTNFLGDFIVSFKGKEDLTGCSVSL  
AGSPDSKCSIVGGGKTVTLKSKFLKALYVVDPLFYKPALPMEFC

>YWNF\_2047246\_Hedwigia\_ciliata.2

GKVFCDQCIQNKVFPFAHPMHDAAKVSVKCKDKYGVMDYAQASTNFLGDFIVSFKGKEDLSGCYVYL  
SGSSDRKCNIVGGGKTLNLKSKFLKSVYVVDPLFYKPWKPMGFC

>TMAJ\_2023569\_Neckera\_douglasii.2

GKVFCDQCIQSKVFPFAHPMNKAKVSVQCKDKSGKVVDYAQASTNFLGDFMVFSFKGKEDLSGCYVY  
LSGSSDRKCNIAAGGGKTLKSLKSKFLKAMYVVDPLFYKPATPMGFC

>BGXB\_2078424\_Plagiomnium\_insigne.2

GKVFCDQCIQSKVFPFAHPMNKAKVSVQCKDQSGKVVDSDAQASTNFLGDFMVSFKGKEDLAGCYVY  
 LSGSADSKCNIVGGGGKTLCLKSKFFFKAMYVVDPLFYKPAKPMGFC

>Sphfalx0052s0052.2  
 GSVFCDQCLQDRVFPFSEPMGAKVTVACKDNNGNVVDSVQGSTDFLGNFLVTFKGKQDLGCTVS  
 LAGSSRSDC

>SKQD\_2012127\_Takakia\_lepidozioides.2  
 GSVFCDQCIQGRVFPFSYPLDGAKVTVQCKDAYGRVVDSDAQGSTNFLGDFLITFKGKEDLSGCQAILS  
 GSPEAKCNIVGGGGRTMTLKSCLFFQALYVVDPLFYKPAQPAGIC

>QVMR\_2006336\_Psilotum\_nudum.2  
 GSVYCDQCLDGHRSVWSIPLDGAKVAVECNDSKGQKVLRSREGETGLFGDYAIRFDGSPHLGGCVVR  
 VLSSPKRTCNIATGSKSISLSWKLFGLSFYSDALSFRPSKAMSFC

>QVMR\_2012184\_Psilotum\_nudum.2  
 GSVYCDRCIEGHRSVWGLPLDGAKVAVECKDSSGQMSLTKEGTTNMLGLYSVEFDGSPMEGCGV  
 RALSSPSESCNVAGVTSQPVLSWKLFSMAFYTGNALSYKPSKPMSC

>ALVQ\_2024672\_Tmesipteris\_parva.2  
 GSVYCDQCLDGRSVWSLPLDGAKVTECNNSKGQEILSREGDTGLFGDYVIRFDGSPNLGGCAVR  
 VLSSPKRTCNIAGSKSISLSWKLFGLSYSADALSFRPSKAMSFC

>ALVQ\_2102199\_Tmesipteris\_parva.2  
 GSVYCDQCVEGHRSIWGLPLDGAKVAVECKNSNGQISLSKQGTNNILGLYSVEFDGSPGMEGCGVR  
 ALSSPSGSCNISAVASQPVLSWKMFLAFYSGNALSYKPSKPMSC

>NHCM\_2064417\_Angiopteris\_evecta.2  
 GSVYCDQCLNGHRTMWSSPLNGAKVMVECKNSNGQVTLKQGETDLLGMYSIKFDGSPDMQGCTA  
 KVVSSPKGPCNLGATASNSVTLWKLFGLAHYAAEALSYKPAKPSIC

>ZZEI\_2006244\_Phyloglossum\_drummondii.2  
 GTVFCDQCLIGEPSIWGPPMHDASVTLDCQNSGNSDQAKTSFIGTFVFKVGGDADLSSCTARLTGSS  
 SASCSLLGNAEKPLKLDWKIFGESFYSVAHVLLPHSGPTPLVLPKPPPLSLPPSPFQDPSSC

>PQTO\_2078178\_Lycopodium\_deuterodensum.2  
 GSVFCDQCLMGKPSIWGSPMHDANVTVDCKNSNNAIQSLHHASTSVLGTFTVTVSGDADLSSCSARL  
 TGSSSSSSCSLFGNAEQSLKLEWKMFGEAFYSVEPMFFKPEKSMPC

>S.moellendorffii\_430897.2  
 GNVFCDQCLHGRPSMWGIPIRGAKVLVHCRNRQGMAMAVPAMSNFLGAFVANFPGEHDLQHCTSR  
 LMWSPLKQCNVANAQSLRLEWKILDNAFYTVKPLYFTPVKPLAIC

>ZFGK\_2039051\_Selaginella\_kraussiana.2  
 GNVFCDQCLHGRPSMWAIPQIGAMVVVHCPSRQGVALQRRAYTNFLGAFIASFPTATLQECTSHLVW  
 SPMSECNVVGSGRQQSLRLEWKMFDDSYTTKPLYFKPLSPMSHC

>SGTW\_2038568-Ginkgo\_biloba.2  
 GNVFCDQCRDGHRTMFDLPINGAKVAVECTGSDGQITMSKQETDLDIGNFMMKFDGTPDLGCTAR  
 VTDSPQSDCKIVGSSSKPLSLFRLFSMEVYTVESLFFQPAKPMSC

>GNQG\_2085018\_Encephalartos\_barteri.2  
 GNVFCDQCLDGLRTMFDLPLYGAQVRVDCRGDDGEITFSKEDSTDLSGNFVVKFDGIPDMSGCAAQ  
 VIGSPRGSDCNIVGSPARPLDLTFLFAMEVYSVDPLFFHAPKPMPC

>IZGN\_2072084\_Dacrydium\_balansae.2  
 GNVFCDECDGRRTLFDLPVNGAKVAIECNGQSNQVTTDLVGNFVMKFDGIPDLGCSARVVQSP  
 GSECNIVSSPAKPLTLTFLFGMEMYTVESLSLEPAKPMSC

>JRNA\_2066102\_Phyllocladus\_hypophyllus.2  
 GNVFCDECDGRRTLFDLPVSGAKVAVECNQSNQVTTDLVGNVYVKFDGTPDLGCSASLVQSP  
 NSECNIVGSPAKRLSLTFLFGMEMYSVESLSLQPAKPMSC

>AmTr\_v1.0\_041.161.2  
 GTVFCDACKDGQRSSFDYPLSGAKVAVACAGNDGQVTVWKEESTNWFGNYGMRFEGLSPDLRCFA  
 QVVANPQGSNCGITGGPARGLNLVDFMFGMEMYVVDLSLQPSQPMSC

>P.equestris\_XP\_020587277.2  
 GSVFCDQCKDGSRLFDYPLSGARVAVSCGDQYREESSNILGTYSVRFNGNPDLLGGCLARVVGRPD  
 NCSVASGPAQSLKFIFRMFDMEAYSVDPLLAQPSKVMDFC

>Oropetium\_25700A.2  
 GMVFCDQCKDGTGRGLFDYPLYGARVAIQCGGGDTPLTVRESNTNWFGGFSIRMEGSPDMNRCTAR  
 VVQGTGHCGSSGAARELTAFRMLGLALYTVPPLLSQPEESMDFC

>Sobic.004G001700.2  
 GMVFCDQCKDGARGLFDYPLYGARVAIQCGGGDTPLTVRESNTNWFGGFSVRMEGSPDMNRCTAR  
 VVQGTGHCGAGAGAGGGGAPRELTAFRMLGLALYTVPPLLAQPEEAMDFC

>Zm00008a018944.2

GMVFCDQCKDGARGLFDYPLYGARVAIQCGGGDTPLTVRESNTNWFGGFSVRMEGSPDMNRCTAR  
 VVQGTGHCGAASSSGGGAVPRELTAFRMLGLSLYTVPPLLSQPEEAMDFC  
 >Aco019419.2  
 GTVFCDQCKDGQRSIFDYPLSGATVAVECGSGGAVLKEDTTNWLGFTYTVRVDGSQDLSACTARVVA  
 APSSCGAAAGPPRPLALMFRMLGMALYAAEEPLLSEPREPVGFC  
 >Aqcoe5G117200.2  
 GTVFCDQCKDGHRS�FDYPLSGMKVRVTCDSMEKEETTNNWLGSTYVSFEGSPDLSCYAHLLLEDGQ  
 GSTKCGAVAGPAQQLKLMFKIFGMEMYAVDSLLSQPARPMSIC  
 >Lsat\_1\_v5\_gn\_8\_126000.2  
 GSVFCDQCKDGQVSLFMDYPLTGKVMACPGQGGQLKVISETTNNFLGSYVMRFDGAPDMSGCR  
 AQVSGDGQGCRAVAGPAQSLNLVFQMFDTSIYTVGHLISQPAQMPNC  
 >GSVIVT01024071001.2  
 GTVFCDQCKDGQRSIFDYPLYGIKVTMACANSNGQITMWREETTNNWFGTYAMRFDGAPDLTGCTA  
 QISGSGQGSTGCRAAGPAQSVRLMFRMFDMEMYAVDSLLSQPAQPMSC  
 >Lus10026279.2  
 GSVFCDQCKDGQLSLFDYPMGTGVRVTMACVDENGETLMSREERTNMFGWYNIRFDGTPDLRNCYT  
 QFAPDSSSTGEGSSSGGSANSCIAAAGPPQKLRLMFMFMGMYSVDSLLSQPAKPMSC  
 >Potri.004G169200.2  
 GTVFCDQCKDGQVSLFDYPIYGKVTMTCADASGQITMSREETTNNWFGNYVMFTDGSPLSNCYAQV  
 SSSGQGSNACGAAAGPAQKLRLTFRMFDMEFYAVDSLLTEPSASMSFC  
 >Eucgr.G01761.2  
 GTVICDQCKDGRMSIFDYPIYGKVMVACTNSDGQVTMSREETTNNWFGNYGMRFEFTPDLSSCHAQ  
 VMGGSGQGSMGCSASASPAQPLRLTFQMFNMEFYSDTLLSQPAQPMSC  
 >Gorai.002G193700.2  
 GAVFCDQCKDGQRSIFDYPLSGMKVTACADGTGQVTMSREETTNNWFGNYVMRFDGTPDLSCNA  
 QVSGSGEGSNDCGATAGPAQKLRLMFRMFMEIYGVDSLLSEPSQPMSC  
 >AT2G16630.2  
 GSVFCDQCKDGERSLFDYVSGIKISVTCADENGQVYMSREETTNNWLGGYVMRFDGTPDLSCYAQ  
 VSDNGVQQDPSSCSIASGPAQKLKLMFSFFGIETFAADALLAQPVQPSSFC

#### Amino acid sequences of W-W domains

>Mapoly0014s0128.2  
 DQWKNSDFFCHWKKATPFQTTVEIMFGKAAKKKYGDMNLYSALQGDDLLKQAVAAMMNAYGNLKF  
 SMSPKAVKKEFLALKGPPQLKWDATWKLKQANLGGWGKGKCM LAPCK  
 >RTMU\_2181156\_Calypogeia\_fissa\_2  
 DDWLNPKFFCYWKNATPHETTQVGMFGKAAEKKYGNISVYTALQSGDDLLKQAVAAMMNSNTNKQF  
 YMSRNEIKKKFNAALGGARQLQWETAWSFKQFNSGYGQGRMM  
 >ILBQ\_2004952\_Conocephalum\_conicum.2  
 EEWMKSEFFCHWKKVTPFQTTVGVMFGKAAKRYGNMTLNQALQGDDLLKQAVAAMMNSYVNP  
 FEMSPRGVKRDFLLAMKGSQQLKWDATWKLKQVNSAWGKGKCYLTACKF  
 >CHJJ\_2136182\_Lejeuneaceae\_sp.2  
 DVWLNLDFLCQWKNATPFDTTVGMFGKAAQNKYGNISVYTALQSGDNLLRQAVTAIMNSNTNAH  
 FYMSPKKVRNEFVKALQGSQQLKRETAWSFQQANSFGSGKCM LSPC  
 >TXVB\_2074716\_Lunularia\_cruciata.2  
 DEWMKSEFFCHWKKATPFQTTVPMFMFGKASKKPYGNMNLVDALHGKDDLLKQAVAAMMNSYGNPK  
 FMSPNGVKKEFLAALKGSQQLKWDATWKLKQANMGWGKGKCL LAPCK  
 >YFGP\_2104693\_Pallavicinia\_lyellii.2  
 GEWLNLTGFFCNWKNATPFQTTVGQMFKGAAQKKYGNMSVYTALQSGDELLREGVAAMMNAYTNAH  
 FYMSPKAIKKDFNSGLLGNRQEQANIAWKQFQQANSYGYGKGKCM LSPC  
 >HPXA\_2020358\_Ptilidium\_pulcherrimum.2  
 FDWQNTKYLRCRWTKATPFQTTVGQMFKGAAQKKYGNLSVYTALQSGDILLRQAVAATMNANSNEH  
 FYISAKSVKKQFNAALGGTQQLQWNTAYAFKQANSYGYGTGKCM LTTT  
 >WJLO\_2035800\_Riccia\_berychiana.2  
 DQWKMSDFFCHWKKVSPFQTTVGMMFGKSAKRYGNMTLLQALQGRDILLKQAVAATMNSYINPK  
 FMSPRGVKNEFLTAMKGPQKLKWDATWKLKQANGGWGKGKCYLTPCK  
 >IRBN\_2161692\_Scapania\_nemorosa.2

EDWLNKLVCHWTNANPYNTTVGHMFGAAQKKYGNMPVYKGLQIGDELLKQSVAAAMMNSYSNTH  
FYMSPEVRKRFNAALKGTQQLQWDTAWSFKEMNTGYGSGTC  
>HERT\_2003915\_Sphaerocarpos\_texasus.2  
DEWMKSEFLCHWKKATPFQTSVGMFMFGDAKKAYGEMNLYTALRHQQGDDLLKQAVAAMMNSYS  
SDKFGMTTAAVKDEFLKALNGSQQLKWDATAWKLKQANAGWGKGKCLLPCKW  
>Pp3c1\_27500V3.2  
LDWLRPDYRCYWPKDLSPWKTSVGRVFGRGAQKKYGNKPLAGGLLTGDDLLRQAITALLNSRTNKH  
FYMSPRGIKAKFSKALSGSWKAKSAQANAFRNANNGYGKGKCLLPCKW  
>Pp3c14\_8250V3.2  
LDWLRPDYKCYWPKDMQPWKTTVGTVFGRGAQKKYGSKTLAGGLLTDDELLRQAISAILNSRTNMH  
FYMSPRAIQRSFAKALYASEPTKAAQAKAFKDANNGYGKGKCLLVSCKW  
>YWNF\_2047246\_Hedwigia\_ciliata.2  
FDWLRPDYKCYWPKDMSPWKTTVGSVFGRGARKKYGYKTLAGGLLTGDELLRQAIAALLNSRTNQH  
FYMSPRGIKSKFSKALWGSWAAKSAQAKAFQAANNGY  
>TMAJ\_2023569\_Neckera\_douglasii.2  
CYWPKDMSPWKTTVGGVFGRGAQKKYGSKTLAGGLLTGDELLRQAIAALLNSRTNQHFYMSPRAIK  
SKFSKALYGSWAAKSAQAKAFKSANNGYGKGKCLLVSCKW  
>BGXB\_2078424\_Plagiomnium\_insigne.2  
ADWLRPDYKCYWPKDLSPWKTTVGSVFGRGAQKKYGYKTLAGGLLTGDELLRQAIAALLNSRTNQH  
FYMSPRAIKGFSAKALSASWAAKSAQAKAFQAANNGYGKGKCLLVSCKW  
>Sphfalx0052s0052.2  
SDWLNIEYYCWWPKALSPLHTTVGSVFGRGAQKKYGNQSLVGGLLTGDELLRQSAIAALLNSQTNLHF  
YMSSRGVTRDFNNALLGSAANAATIANQLAAANSYGGRGKCLLVCKL  
>SKQD-2012127-Takakia\_lepidozioides.2  
YDWLHIDYFCWWPKTMSPFRTTVGRVFGRLAQKKYGNMNLSSALECSDPLLREATAALLNSYTNRHF  
YMSSRRVVRDFNIALRGSPAVTANQAQAFHAANSYGFGKGKCLLVCKL  
>QVMR\_2006336\_Psilotum\_nudum.2  
NDWLDPQFKCYWRLLSPDTKVSVLVLLREAITSSLNAFNSIHFYSPVSVHVHFNQAIKGTDKDVTRW  
ALAFKRANSYGKGKAKCLMTKC  
>QVMR\_2012184\_Psilotum\_nudum.2  
YYWLKPEYRCYWRLLSPNTTISVFYGEAAKKYGANITLWEGLQGGGDVQKVLLRESITASLNAFNSL  
KFYYNAIAVDVHFNEAINGTDNDVAVKWGSEFRSANSYG  
>ALVQ\_2024672\_Tmesipteris\_parva.2  
NDWLDPQFKCYWRLLSPSTKVSVFYGETAGKKYGSNITLWEGLHGSGDVNVKVLVLLREAITSSLNAFNSI  
PFYYNAVSVHVHFNQAIKGTDKDVTRWALAFKRANSYGKGKAKCLMTCK  
>ALVQ\_2102199\_Tmesipteris\_parva.2  
YNWLKPEYRCYWRLLSPNTTISVFYGEAASNKYGENTTLWDGLQGGGDVQKVLLRESITASLNAFNS  
WKFYYNAITVDVHFNEAIRGTDKDAVKWGSFQSANSGYGKSKCLMTVCK  
>NHCM\_2064417\_Angiopteris\_evecta.2  
YYWNTNPQYRCYWRLLTSPDWKVSSYYGEAAGKRYGANKTLWQGLQGRGELYGALLREGITSSLNAL  
NSAKFYYNAVEVNIHLNEALKGTTKDALKWMLAFRRANNGYGKGKAKCLMSVCK  
>ZZEI\_2006244\_Phyloglossum\_drummondii.2  
DEWMKPEYRCYWKFPSPNETVVEAFGPAAAHRYGTNTTLM DALSGGGGGGKLRGRSKAYRTLLPE  
AVAALLNAYSSWKFKYAPWAVAAEFTEVVVRNSPRGAACKLAEDFRTANSEHKCLLQACK  
>PQTO\_2078178\_Lycopodium\_deuterodensum.2  
DQWAKPEHLICYWKFSSPNETAREAFGPAAVHHYGDTTLM DALNGKSTAVEMIYRSRYSRVLLRESV  
TALLNSYSSVKFKYSPLTVIAQFTDVIASHSSRAAKLAHDFQTANSGGKCLLQCK  
>S.moellendorffii\_430897.2  
DHWMPVYSCHWKFVTPDESIKLLGPRARDKYGNITALEALVKNSSLNGIADQHYATTYNGLLSETV  
AALLNSYNSRFSLSPTMISRIFDNVIARGTPKDASKIAAEFRANAGLGKGTCLLDVCKSK  
>ZFGK\_2039051\_Selaginella\_kraussiana.2  
DHWKNPRLCNWRLLAPGQLVGDVLGWSAEARYGNLTLLQALENGPTLVSESLAALLNSYFSSKFPY  
SPLWIASSFKHALSHGTANRLASQLRKANAGLGKGHCCLLQPC  
>SGTW\_2038568-Ginkgo\_biloba.2  
EYWNPNAYNCYWRLLRPDPTVSLAFGEEAAKKYGRNMTLWEGLYGRGDVYRTLLREATAALLNSYN  
SFQFQYNTLSVFLHMNSALQGSPQDALKQALYFKRANTGGGKIKCSLTPCK  
>GNQG\_2085018\_Encephalartos\_barteri.2  
EYWKPEFRICYWKLVPNTTVGAAGFEVAGSKYGNLSLWDALFGRADVYKTLLREATAALLNSYSS  
FLFQYNALTVDRLNSALQGSPPDALIQALKFKKANYGRGKAKCLFIPCK  
>IZGN\_2072084\_Dacrydium\_balansae.2

DFWVRPEYACSWRVVRPDTKVG VVFGAE AANKFGHNMTLWEGLHGKGDVYRTLLREGTASLLNSY  
 NSLSFCYNTLSVIMHMHSA LHS GSPQYALKQAFYFKKANIGGGSTKCLKPCK

>JRNA\_2066102\_Phyllocladus\_hypohyllus.2

DLWRKPEYACYWRVVRPDTKVG VVFGEEALNKFQGNMTLLEGLYGRGDVYRTLLREGTASLLNSYN  
 SFSFSYNTLSVVMHMHSA LHS GSPRYALKQAFHFKKANIGGRNTKCLKPCK

>AmTr\_v1.0\_041.161.2

EYWLMPEYRCYWKVVGPGTKVAVAFGPAAQKYGTDLPYALQGRGDLYRTLLREATTALLNSYN  
 SLQFGYPTLTVVGNMNMWALQASPQEALRQAMRFKRANAGTPETPCRFTPCN

>P.equestris\_XP\_020587277.2

SKWLMPAYKCYWKMVSPETPVAVVFGPVAAGKYGTDMSLWTALHGRGDVYRTLLREATAALLNSYN  
 SLSFPYPTLSVISHMNSALLGSQREALMTALRFRRANSGVAGHSTVACNFTPCS

>Oropetium\_25700A.2

EKWAAPEQRCRWKVVTPTNTTVAMAFGPLAAQRYGSELTLEALEGRGDMYRTLLREATAALLNAYY  
 NAPGGPFLYPTTASVIDHMNGALLSSAQRVLIEGARFRRANAGGGGPAGRTRLTCD FATPCAPAAEA  
 PQSGLES RHY

>Sobic.004G001700.2

DMWASPEHRCHWKVLTPTNTTVAMAFGPLAAQRYGSELTLEALEGRGDMYRTLLREATAALLNAYY  
 NAPGGPFLYPTTASVMDHMNGALLSSGQRVLLEGARFRRANAGGGGPAGRTRLPCDFTPCGSCAP  
 PTS

>Zm00008a018944.2

DMWSSPEHRCHWKVVTPTNTTVAMAFGPLAAQRYGSELTLEALEGRGDMYRTLLREATAALLNAYY  
 NAPGGPFLYPTTASVMDHMNGALLSSGQRVLLEGARFRRANAGGGGGRTRL MCDFTTCS

>Aco019419.2

DKWITPDYMCYWKVVS PGTSVALAFGPVAAARYGMDMTLWQGLQGRGDVYRTLLREATTSLNSYN  
 SLGFFYPTLSVIELTNLALLGSPQQALMTALRFRRANAGVAGRGTNATCNFTPCS

>Aqcoe5G117200.2

EIWTRPEYRCHWTFVQPDTKVAVAFGLIAARKYGNDMSLWQGIQGRGNIYRTLLREGTTALLNSYNSI  
 QFHYPTLSVLYHMNSALMGTPRQALMTALRFKRANS GYGNSGARC NLTPCK

>Lsat\_1\_v5\_gn\_8\_126000.2

RMWTMPEHECYWRVLAPDLKVSFVFGPLAARKYGNDITLRGSMTGRGDPYKTLLREATTALLNSYNS  
 IEFPHYPLDVVQHLNMALIGGSTRQVLITALQFLRANSGRPGNV TCKFTTCK

>GSVIVT01024071001.2

EIWTAPEYKCYWKVVNPDMKVASVFGLLAAQKYGTDMTLREGLQGRGDPYRTLLREAITSLNSYNS  
 LLFPYHTLGVIQHMSLALMG SQQNVLLTALRFKRANS GSGNLTCKFTACK

>Lus10026279.2

QTWTAAEYRCFWRIVTPETKVAVAFGLPAAQRYGTEMTLLEALQGRGDPYRTLLREATTSLNSYNS  
 LRFYDAVS VVARTNYALLGSQRDALYTALRFIRANS GSPCAAPGSPAVTCRLSPCK

>Potri.004G169200.2

QSWTMPEYKCYWRAVSPDMKVAVVFGLLAARRYGTDMTLWQGLQGRGDPYRTLLREGTAALLNSY  
 NSIEFPYNAISVVTRMNMWALMG SQRSVLLTALRFMRANS GYGRVTCKFNTCK

>Eucgr.G01761.2

EKWMMSEYKCYWRAVNPDTKVALVFGLTAARRYGTGLTLWQGLQGRGDPYRTLLREATTALLNSY  
 SIQFPYHTLGVLQHMNSALMGSTQNVLLTALRFRRANLGYGTTTCKFTPCK

>Gorai.002G193700.2

QYWTMPEYKCYWRVLNPETKVSLIFGPLAARRYGS DMTLWESLQGRGDPYKTLLREATTALLNSYNT  
 LQFPYNSIGVVTRTNWALMGSTRGV LITALRFIRANS GSGRV TCKLTPCKS

>AT2G16630.2

QLWMKPEYRCYWRAIGPDTKVAVAFGLVAGRIYGTDMTVREALDGRGEAYKTLLREATTALLNSYNS  
 LGFPYNSVAVITYTNLALLGNSEHDVLM TAI RFIKANS GTCRFTVCN
