# Supplementary material for: The Cell Wall PAC (Proline-Rich, Arabinogalactan Proteins, Conserved Cysteines) Domain-Proteins Are Conserved in the Green Lineage
Source: MDPI journal article supplement (doi:10.3390/ijms21072488), 2020-04-03
Supplement: s1 [file s1]

CQLCLTLQFIGTGTSGAKSFC AALNKAADTFQPLADAQGIRLLGSGSGGGSVWRASGCGLTDSPIAAVSV CAD  
LLAAQAPALPRVLSQGLLQLFDSLFPPLASGAGSGGGC

>g11926\_1\_Chlamydomonas\_rheinardtii

CEVCLTLTLPPPGAAAAATQGGGLPFALTDPLCTDLESPMLSGLADAARAAGATISIPFARTACSTSYVPTATPMVL  
PYLRLCGAFRTASDGLRLQSWLAGPTTGLSAWLLQLTGGEAC

>g11926\_2\_Chlamydomonas\_rheinardtii

CVVCITTTIQQPPVSASASTVYNLTDAQCLDLSSTIIDNMQMLAFDGTGAVIVTPFTQDACS PSYNATSVPAKYPFARV  
CGAFLSAEDGALVADPLKELMKEWVESLTGGAAC

>g11926\_3\_Chlamydomonas\_rheinardtii

CVVCITTTIQQPPVSASASTVYSLTDAQCLDLSSTIIDNMQMLAFDGTGAVIVTPFAQDACSLSYNATSVPAKYPFARV  
CGAFLSADDGALVADPLKELMKEWVESLTGGAAC

Full length sequence

>g11926.t1

MAWRWRAWFTLLVLFATWPTARGQGASTPSDEYDAALPARSTSSFPWCQCVAYDCGCSPYQLQVLPPTRDGI  
NVRSCFRVTVYVCGDTRKCCRGMLAAVDKLAETSAACSERGRVLGVTLNGRVHESWNPYVHGTGAELKIYNLQ  
RSNATFAGVLVCVTTAPPCGWLNDLCVHSGSGPGGAGADGTSGGGGGMQNSCRYSLSDTPEATYCPVCAVRL  
PPAPPPSPPPGNAPGRRRARPPPEPTPPSPPTSPAPTCEVCLTLTLPPPGAAAAATQGGGLPFALTDPLCT  
DLESPMLSGLADAARAAGATISIPFARTACSTSYVPTATPMVLPYLRLCGAFRTASDGLRLQSWLAGPTTGLSAWL  
LQLTGGEACPASPGLSGYVITSLASSPAGGDTCLSAAAVQTCVAAQAAPPPPPPKARMPPPRASAAARAPPLPPL  
PDVPQVGGPQCELYLHIQVLPAAASAASASSSLAAGAFGRRRMQQAWGPGVEGEEVVGKGSAAAGEAAAMA  
VTPQAVALLRPGSGSLSGSGSGSRAASNGWRRQKQDITTEQAFSFDVASCAELADRIISGFAVQAPLVGSEIT  
VPFTQFACAPQQLTLYGAFATAYDGHLLYDWLNGPDGMQAWVHAVTGGDACSQRLSGYTIRSLVTGPGGELAA  
SCMSGFAQQCPSTPPPFPLPPLPPESSPPSPPLPPPDSPPPSPWPPPDTPPPSPPPPPPPDAAPPPPPNSPP  
QSTPPPPPDSPPPSPPPPPPTPPVAPEPPSPQPPGLPSPSPPPQIPGPQVPSPPLPSPLPPSPPPSPAPPPSPQPP  
PPSPSPPPPCVVCTTTIQQPPVSASASTVYNLTDAQCLDLSSTIIDNMQMLAFDGTGAVIVTPFTQDACS PSYNATSV  
PAKYPFARVCGAFLSAEDGALVADPLKELMKEWVESLTGGAACSSASLSGHLISSKATDPSGAASCLDASFRQAC  
SIRRPPSPRPQPRPPSPAPPPSPAPPPSPGPPSPQPPSPEPPSPEPPSPEPPTPVPPSPAPPPSPAPPPSPAP  
PLPPPPSPVPPSPAPPPSPVPPSPMPPPSPAPPSPTPPSPTPPPSPVPPSPQPPSPAPPPSPAPPPSPTPPSPAPPTAP  
PSPIPPSPPPPPAPPPCITCVSVFVLPDSLISGVPFRPNASLCSMAAMVSAGFTAAAADAGAVVVQPFVAVTSCVR  
GGGPLAGVLTPLMKICGGLSADDGAKLQLRIPAATAQPPVSATTAFATAAFATAAFPTAAASATTQPATTEPAT  
PEPVATVSTATQPSTALAVAALAAAAGPSASFTAATLAAAAPSPAAPTAAATVAAATGSASTKPFADFDDSECGKLAK  
RIDDGFKQQAALLGANIQVPFRLDHCTPTYLKLMTGFGSARDGEMLQEWLNGLPLGMLDWVKSVTGECPDRLSGY  
AVRSVAVPPNNDTNSCLVGDFFKLECFYQPPPPQPLPPPSPPPPPCVVCTTTIQQPPVSASASTVYSLTDAQCLDLS  
STIIDNMQMLAFDGTGAVIVTPFAQDACSLSYNATSVPAKYPFARVCGAFLSADDGALVADPLKELMKEWVESLTG  
GAACSSASLSGHLISSKTPSPAPFAFTPASCADLAADVTDVVSQQAADMGSVMLAPFALTECDNSLRLCGTFQS  
AADGAALGPWLEDQSQFWLEALGGGDCSAELAGYSMVFEAVAGPGGGGVCLQVNAAPLPRIPEVLVHILLQPP  
DGLPAVAEAITDGVGSATSTSRHRERLLLQQLTVTATAADASGSAAFSFDAAASCAALSTRIATGFAVQAPLVGSDIT  
VPFTQFACAPQQLVLYGSFATAYDGFLLYDWLNGPDGMQAWVHVSVTGGDACSPQLQGYLIRSVVTGPGSELAP  
SCMAGGFKQCEGGPALPPPPPPPPSPPPPLPPSPSPSPGPPPPRQATPGLRQPSMPPPPPPSPSPPPPPPS  
RPDLVQTHECVASTNDVPYSVGPLYVRQSLDQFGAPAVAMCTRVSGRQACRQAACCDMDFAKIEVPINPACRN  
ELRRIAVNRRLKDWWSGYSYPSGLLTVKFESLITDLPDGPDAELCWLVRPGGVCADPSVFCLQRSCQVNIFSTNN  
KCCPSAFI

>g11927\_1\_Chlamydomonas\_rheinardtii

CEVCVTLTIIPVLSDGTSVFTFDNDS CADSATTFIASMEFIASDAGSLIVAPFVLTT CSPAYNVSESPIVYPYLRVCG  
AFLSASDGAMIESALQDFMQLWIQDLVGGDPEAC

>g11927\_2\_Chlamydomonas\_rheinardtii

CEVCITLTIRPPDILPGPLFTFDRDTCTSVSDMMIINLANIAADV GALLITPFTLDICSGDFSATESPPVYPYLRVCGAL  
LSAEQGARMQPGVLAAMQIWMISLAGGPAEDC

*Streptophyta; Streptophytina; Coleochaetophyceae; Coleochaetales; Coleochaetaceae*

>GBSL01052221\_Coleochaete\_orbicularis

GVVYCDCCRTGKPNTNETNMQGAEEYTC LTYTGGESSQTLRTDSNGQYLSAPLDSALVTHCTVMLKSSPDSVC  
AELGPGGGGPIFETPIANASVSVRIPDFC

Full length sequence

>GBSL01052221.1\_6 TSA: Coleochaete orbicularis comp36682\_c0\_seq1 transcribed RNA sequence

VPPSLAPPPATVLSSSGILRARNYRGGKGVTFRLLGVVYCDCCRTGKPNTNETNMQGAEEYTC LTYTGGESS  
QTLRTDSNGQYLSAPLDSALVTHCTVMLKSSPDSVCAELGPGGGGPIFETPIANASVSVRIPDFCFQPSPEGMQ  
DNYSKCTPPGPEPSTAPNSDETSTSVEASPTDDSPPADGDHEGSPSQYTLPPSELSPYLAPTAPSPAPEER
