# Supplementary material for: The Cell Wall PAC (Proline-Rich, Arabinogalactan Proteins, Conserved Cysteines) Domain-Proteins Are Conserved in the Green Lineage
Source: MDPI journal article supplement (doi:10.3390/ijms21072488), 2020-04-03
Supplement: s1 [file s1]

## Supplementary file 8

Top-scoring 3D-models of PAC domains and the corresponding scores (page 2)

3D-model of the *C. orbicularis* putative PAC domain (GBSL01052221) (page 3)

3D-models of proteins exhibiting  $\alpha$ -helices (page 4)

ILBQ\_2006312\_Conocephalum\_conicum

YFGP\_2007785\_Pallavicinia\_lyellii

# Supplementary file 8. Top-scoring 3D-models of PAC domains and the corresponding scores

Both I-Tasser and MODELLER tools usually provide similar models in simple modeling tasks - if a solid template structure is available. The models differ more if they are less reliable. Thus, the root-mean-square deviation (RMSD) between the models can provide an additional sound estimation of the reliability of the prediction, besides the scores. The more resulting structures differ, the less reliable they are.

The table below provides RMSD values based on the CA-atoms between the top-scoring MODELLER and I-Tasser models. Only the structures of domains with RMSD values higher than 10.0 are considered for further analyses.

I-Tasser was not able to find conformations which enables disulfide bridges between the predefined binding partners

PAC domain in bold characters are those shown in Figure 5.

\* lower score is better

| PAC domain                             | Modeling tool | Sequence identity | Model                                      | DOPE*        | MAESTRO*     | ProSA 2003* | RMSD between top scoring MODELLER and I-Tasser model* | Comments                        |
|----------------------------------------|---------------|-------------------|--------------------------------------------|--------------|--------------|-------------|-------------------------------------------------------|---------------------------------|
| <b>Oropetium_11363A.2</b>              | I-Tasser      | 12.5              | Oropetium_11363A.2_model1.pdb              | -0,032464677 | -1,8025527   | -7,6        | 3,884751081                                           |                                 |
| AT5G10130.1                            | I-Tasser      | 20,3              | AT5G10130.1_model1.pdb                     | -0,454205842 | -2,244394931 | -6,79       | 4,281828403                                           |                                 |
| AmTr_v1.0_00047.2                      | I-Tasser      | 17,6              | AmTr_v1.0_00047.2_model1.pdb               | -0,410957408 | -1,384055711 | -7,16       | 4,322821617                                           |                                 |
| <b>Gorai.002G165500.1</b>              | I-Tasser      | 9,9               | Gorai.002G165500.1_model1.pdb              | -1,076360751 | -2,000915032 | -6,1        | 4,361501694                                           | no Gly upstream Cys 1           |
| TFDQ_2013818_Monoclea_gottsche         | I-Tasser      | 18,4              | TFDQ_2013818_Monoclea_gottsche_model1.pdb  | -0,390457154 | -1,190396533 | -7,33       | 4,415602207                                           |                                 |
| AmTr_v1.0_061.7.1                      | I-Tasser      | 22,8              | AmTr_v1.0_061.7.1_model1.pdb               | -1,047867733 | -2,291373767 | -6,72       | 4,424602509                                           |                                 |
| AmTr_v1.0_062.88.1                     | I-Tasser      | 15,0              | AmTr_v1.0_062.88.1_model1.pdb              | 0,118184404  | -1,788505066 | -6,16       | 4,51101923                                            |                                 |
| <b>ILBQ_2006312_Conoccephalum_coni</b> | I-Tasser      | 11,2              | ILBQ_2006312_Conoccephalum_coni_model1.pdb | -0,267583162 | -0,656269559 | -5,97       | 4,732092381                                           | prediction of $\alpha$ -helices |
| <b>AmTr_v1.0_019.68.1</b>              | I-Tasser      | 11,9              | AmTr_v1.0_019.68.1_model1.pdb              | -0,048679557 | -1,340679231 | -7,27       | 4,749872208                                           | no Gly upstream Cys 1           |
| <b>AT1G28290.3</b>                     | I-Tasser      | 21,6              | AT1G28290.3_model1.pdb                     | -0,322687102 | -1,348849379 | -6,44       | 4,759518147                                           |                                 |
| AT2G34700.3                            | I-Tasser      | 17,6              | AT2G34700.3_model1.pdb                     | -0,204833192 | -1,547771425 | -7,48       | 4,820729256                                           |                                 |
| Bradi3g20970                           | I-Tasser      | 14,4              | Bradi3g20970_model1.pdb                    | -0,210726377 | -1,542712873 | -7,09       | 4,84980917                                            |                                 |
| Mapoly0014s0128.2                      | I-Tasser      | 18,3              | Mapoly0014s0128.2_model1.pdb               | 0,032723491  | -0,919309931 | -6,94       | 4,858971596                                           |                                 |
| AmTr_v1.0_066.9.4                      | I-Tasser      | 25,6              | AmTr_v1.0_066.9.4_model1.pdb               | -0,799350464 | -1,220401257 | -7,38       | 4,883558273                                           |                                 |
| Mapoly0139s0006.2.4                    | I-Tasser      | 15,2              | Mapoly0139s0006.2.4_model1.pdb             | 0,079750506  | -2,031587116 | -7,22       | 4,911189556                                           | prediction of $\alpha$ -helices |
| AmTr_v1.0_041.161.2                    | I-Tasser      | 14,3              | AmTr_v1.0_041.161.2_model1.pdb             | -0,143505494 | -1,82528676  | -5,83       | 5,180187702                                           |                                 |
| TFDQ_2117810_Monoclea_gottsche         | I-Tasser      | 22,9              | TFDQ_2117810_Monoclea_gottsche_model1.pdb  | -0,804771044 | -1,306090621 | -7,16       | 5,275324821                                           |                                 |
| Bradi3g21030.2                         | I-Tasser      | 12,3              | Bradi3g21030.2_model1.pdb                  | -0,364703605 | -0,591656625 | -6,46       | 5,327032566                                           |                                 |
| <b>HVBQ_2020253_Tetraphis_pelluci</b>  | I-Tasser      | 12,0              | HVBQ_2020253_Tetraphis_pelluci_model1.pdb  | 0,437950655  | -0,500743718 | -6,83       | 5,332158089                                           | prediction of $\alpha$ -helices |
| AT5G54855.1                            | I-Tasser      | 18,3              | AT5G54855.1_model1.pdb                     | -0,188869501 | -1,42199867  | -7,35       | 5,466360569                                           |                                 |
| CHJJ_2011674_Lejeuneaceae_sp_n         | I-Tasser      | 13,6              | CHJJ_2011674_Lejeuneaceae_sp_n_model1.pdb  | -0,800172013 | -2,273718658 | -6,75       | 5,495284557                                           | prediction of $\alpha$ -helices |
| RXRQ_2140319_Phaeoceros_caroli         | I-Tasser      | 20,8              | RXRQ_2140319_Phaeoceros_caroli_model1.pdb  | 0,000180931  | -1,18472794  | -5,6        | 5,543737888                                           |                                 |
| Bradi3g20980.2                         | I-Tasser      | 13,6              | Bradi3g20980.2_model1.pdb                  | -0,557693647 | -1,680107732 | -6,6        | 5,630766392                                           |                                 |
| AmTr_v1.0_153.4.1                      | I-Tasser      | 20,0              | AmTr_v1.0_153.4.1_model1.pdb               | 0,047110306  | -0,906467314 | -6,1        | 5,81362772                                            |                                 |
| <b>IQJU_2004004_Anthoceros_formos</b>  | I-Tasser      | 14,8              | IQJU_2004004_Anthoceros_formos_model1.pdb  | -0,036337289 | -0,363583909 | -6,19       | 5,971568108                                           |                                 |
| <b>AmTr_v1.0_068.122.1</b>             | I-Tasser      | 15,2              | AmTr_v1.0_068.122.1_model1.pdb             | -0,196016121 | -1,426214731 | -6,35       | 6,117260933                                           |                                 |
| Oropetium07184A.3                      | I-Tasser      | 24,0              | Oropetium07184A.3_model1.pdb               | -0,806702421 | -1,219163372 | -6,95       | 6,120306015                                           |                                 |
| AT3G09925.1                            | I-Tasser      | 16,8              | AT3G09925.1_model1.pdb                     | -0,032861326 | -1,224853771 | -4,81       | 6,134305477                                           |                                 |
| AmTr_v1.0_047.45.1                     | I-Tasser      | 16,8              | AmTr_v1.0_047.45.1_model1.pdb              | -0,660871901 | -1,629893761 | -7,42       | 6,3801651                                             |                                 |
| AT5G15780.2                            | I-Tasser      | 20,0              | AT5G15780.2_model1.pdb                     | -0,746161239 | -1,384316548 | -7,59       | 6,560771465                                           |                                 |
| Oropetium_17805A.1                     | I-Tasser      | 23,8              | Oropetium_17805A.1_model1.pdb              | -0,836394711 | -1,092954972 | -7,35       | 6,725212097                                           |                                 |
| GBSL01052221.1_6_Coleochaete           | I-Tasser      | 16,4              | GBSL01052221.1_6_Coleochaete_model1.pdb    | -0,204761625 | -1,851821353 | -5,89       | 6,756970882                                           | 7 Cys, prediction of a-helices  |
| IQJU_2076581_Anthoceros_formos         | I-Tasser      | 22,0              | IQJU_2076581_Anthoceros_formos_model1.pdb  | -0,554490867 | -1,243160888 | -6,67       | 6,958469868                                           |                                 |
| AT5G05500.3                            | I-Tasser      | 17,6              | AT5G05500.3_model1.pdb                     | 0,186798645  | -0,840101526 | -6,26       | 7,12987709                                            |                                 |
| WNGH_2084316_Aulacomnium_heter         | I-Tasser      | 30,4              | WNGH_2084316_Aulacomnium_heter_model1.pdb  | -0,945875405 | -2,172397247 | -7,44       | 7,296413422                                           |                                 |
| Bradi3g21000.2                         | I-Tasser      | 14,4              | Bradi3g21000.2_model1.pdb                  | -0,303142539 | -1,418778655 | -7,86       | 7,453835487                                           |                                 |
| Oropetium_03649A.4                     | I-Tasser      | 16,0              | Oropetium_03649A.4_model1.pdb              | -0,216938665 | -2,153989215 | -5,66       | 7,76369381                                            |                                 |
| <b>QVMR_2011678_Psilotum_nudum.nd</b>  | I-Tasser      | 15,2              | QVMR_2011678_Psilotum_nudum.nd_model1.pdb  | -0,495463495 | -0,747178083 | -5,23       | 8,444963455                                           | prediction of $\alpha$ -helices |
| Lus10026281.2                          | I-Tasser      | 15,7              | Lus10026281.2_model1.pdb                   | 0,517180007  | -1,450888971 | -6,48       | 8,625576019                                           | prediction of $\alpha$ -helices |
| TFDQ_2004419_Monoclea_gottsche         | I-Tasser      | 18,4              | TFDQ_2004419_Monoclea_gottsche_model1.pdb  | -1,001793526 | -1,515026176 | -7,52       | 8,810534477                                           |                                 |
| WNGH_2083088_Aulacomnium_heter         | I-Tasser      | 26,4              | WNGH_2083088_Aulacomnium_heter_model1.pdb  | -0,567925533 | -1,671295764 | -6,86       | 8,882749558                                           |                                 |
| AmTr_v1.0_041.169.2                    | I-Tasser      | 15,6              | AmTr_v1.0_041.169.2_model1.pdb             | -0,466132691 | -1,189647673 | -7,53       | 11,09608364                                           |                                 |
| Bradi3g21010.2                         | I-Tasser      | 14,8              | Bradi3g21010.2_model1.pdb                  | -0,349565123 | -0,847062522 | -7,2        | 11,56159878                                           |                                 |
| Oropetium_03650A.3                     | I-Tasser      | 12,8              | Oropetium_03650A.3_model1.pdb              | -0,836217324 | -1,043942678 | -5,28       | 12,05586529                                           |                                 |
| <b>UCRN_2050882_Megaceros_tosanus</b>  | I-Tasser      | 9,6               | UCRN_2050882_Megaceros_tosanus_model1.pdb  | -0,300128844 | -1,851226693 | -5,79       | 14,60367012                                           | prediction of $\alpha$ -helices |
| Oropetium_22028A.1                     | I-Tasser      | 16,0              | Oropetium_22028A.1_model1.pdb              | -0,700727846 | -1,150744996 | -6,95       | 15,68772411                                           |                                 |
| AmTr_v1.0_019.72.1                     | I-Tasser      | 15,2              | AmTr_v1.0_019.72.1_model1.pdb              | -0,517700354 | -1,35219022  | -6,55       | 16,10477257                                           |                                 |
| YFGP_2007785_Pallavicinia_lyel         | I-Tasser      | 11,9              | YFGP_2007785_Pallavicinia_lyel_model1.pdb  | -0,069022948 | -1,164291398 | -4,31       | 17,43003654                                           | prediction of $\alpha$ -helices |
| AT2G16630.2                            | modeller      | 13,0              | AT2G16630.2_model1.pdb                     | -0,372392901 | -0,976095088 | -6,94       | 17,95002937                                           |                                 |
| Oropetium_25700A.2                     | modeller      | 15,5              | Oropetium_25700A.2_model1.pdb              | -0,439591223 | -1,368648691 | -5,99       | 19,16456223                                           |                                 |

## Supplementary file 8

3D-model of the *C. orbicularis* putative PAC domain (GBSL01052221)

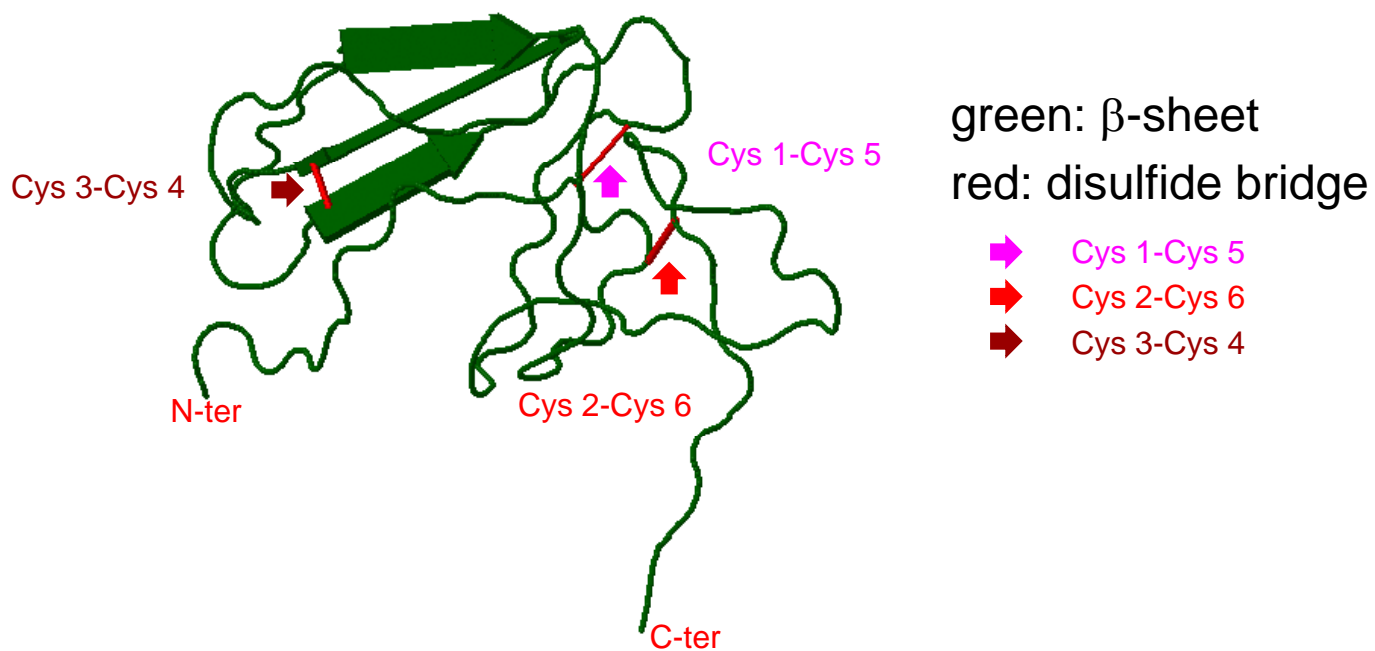

## 3D-models of proteins exhibiting $\alpha$ -helices

ILBQ\_2006312\_Conocephalum\_conicum

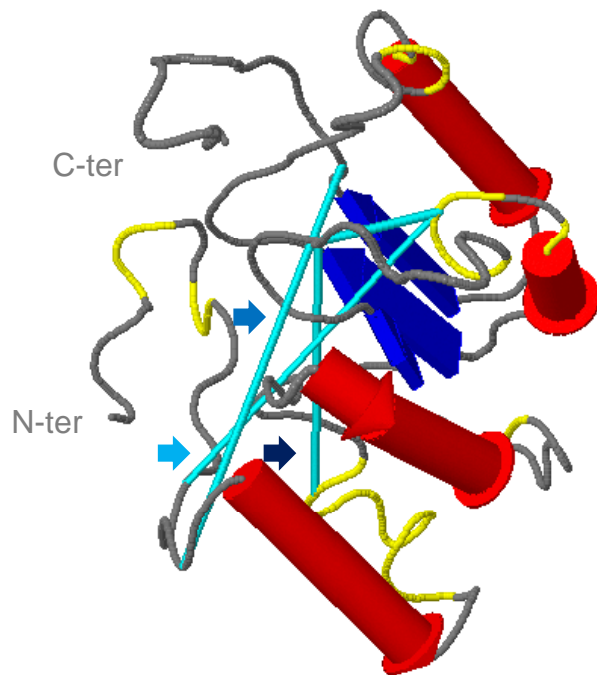

red:  $\alpha$ -helix

blue:  $\beta$ -sheet

cyan: disulfide bridge

YFGP\_2007785\_Pallavicinia\_lyellii

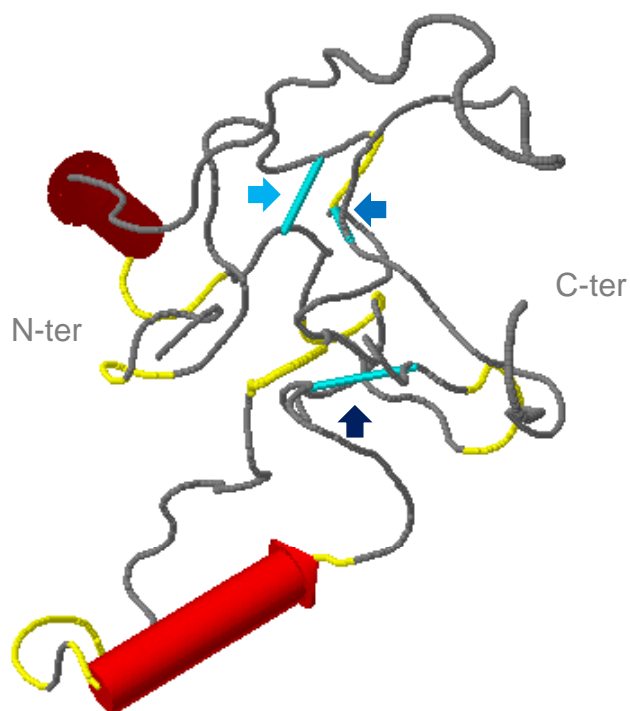

➡ Cys 1-Cys 5

➡ Cys 2-Cys 6

➡ Cys 3-Cys 4
