# Supplementary material for: The Cell Wall PAC (Proline-Rich, Arabinogalactan Proteins, Conserved Cysteines) Domain-Proteins Are Conserved in the Green Lineage
Source: MDPI journal article supplement (doi:10.3390/ijms21072488), 2020-04-03

**Supplementary file 10.** The conserved **W-W** domain from PAC domains belonging to clade D from Bryophytes to Brassicales (44 sequences, see Supplementary file 7).

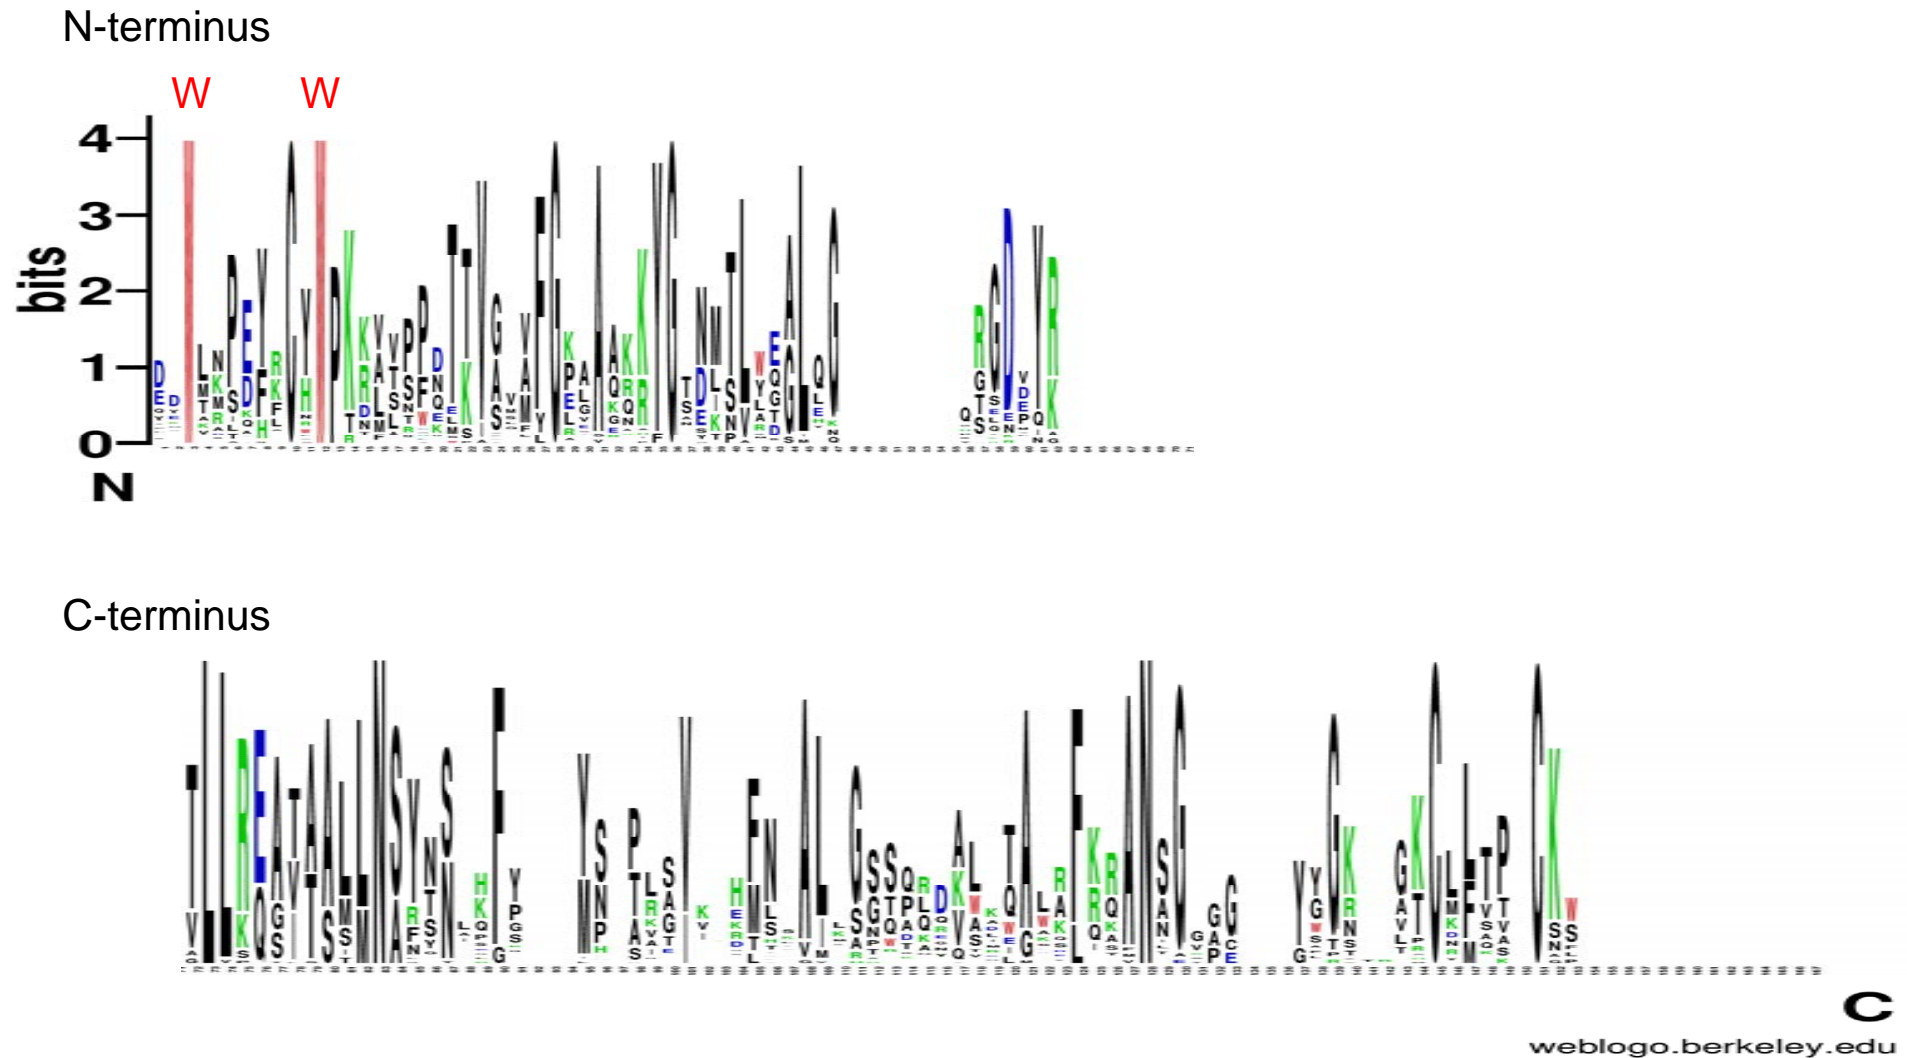

Supplement: s1 [file s1]
